# Supplementary material for: Copper-catalyzed direct oxidative synthesis of α-ketoamides from aryl methyl ketones, amines, and molecular oxygen
Source: Royal Society of Chemistry journal article supplement (doi:10.1039/c1sc00312g), 2011-10-25

## Supporting Information

### Copper-catalyzed direct oxidative synthesis of $\alpha$ -ketoamides from aryl methyl ketones, amines, and molecular oxygen

Feng-Tian Du,<sup>a,b</sup> and Jian-Xin Ji\*<sup>a</sup>

<sup>a</sup> *Chengdu Institute of Biology, Chinese Academy of Sciences, Chengdu 610041, China* and <sup>b</sup> *Graduate University of the Chinese Academy of Sciences, Beijing 100049, China*

#### Table of Contents

|                                                                                                                                                                      |     |
|----------------------------------------------------------------------------------------------------------------------------------------------------------------------|-----|
| 1. General remarks.....                                                                                                                                              | S2  |
| 2. Experimental section.....                                                                                                                                         | S2  |
| 2.1 Investigations on the catalytic activity of Cu(I) and Cu(II) salts under neat conditions.....                                                                    | S2  |
| 2.2 Investigations on the catalytic activity of CuI with different source and purity .....                                                                           | S3  |
| 2.3 Labeling experiments.....                                                                                                                                        | S4  |
| 2.4 Isolation of intermediate <b>7a</b> .....                                                                                                                        | S10 |
| 2.5 Conversion of <b>7a</b> into $\alpha$ -ketoamide <b>3aa</b> .....                                                                                                | S10 |
| 2.6 The variation of phenylglyoxal intermediate and $\alpha$ -ketoamide with reaction time in the reaction of acetophenone <b>1a</b> with piperidine <b>2a</b> ..... | S10 |
| 2.7 Conversion of enamine <b>4a</b> into <b>3aa</b> .....                                                                                                            | S11 |
| 2.8 EPR experiments.....                                                                                                                                             | S11 |
| 2.9 LC-MS analysis experiments.....                                                                                                                                  | S15 |
| 2.10 General procedure for the synthesis of $\alpha$ -ketoamides.....                                                                                                | S27 |
| 3. Characterization data of $\alpha$ -ketoamides.....                                                                                                                | S28 |
| 4. References.....                                                                                                                                                   | S33 |
| 5. Copies of <sup>1</sup> H NMR and <sup>13</sup> C NMR spectra for all compounds.....                                                                               | S34 |
| 6. Copies of high temperature (160 °C) <sup>1</sup> H NMR spectra of $\alpha$ -ketoamides <b>3ad</b> and <b>3ae</b> .....                                            | S56 |

## 1. General remarks

CuI (98%) was purchased from Alfa Aesar Chemical Company and used as received. 5,5-dimethyl-1-yrroline *N*-oxide (DMPO) was purchased from Acros chemical company. Superoxide dismutase (SOD) and H<sub>2</sub><sup>18</sup>O (97%) were purchased from Aldrich chemical company. <sup>18</sup>O<sub>2</sub> (97%) was purchased from Beijing Gaisi Chemical Gases Center. The catalyst [Cu(CH<sub>3</sub>CN)<sub>4</sub>]OTf was prepared from commercially available Cu(CF<sub>3</sub>SO<sub>3</sub>)<sub>2</sub> according to a previously reported procedure.<sup>1</sup> Enamine **4a** was prepared from acetophenone and piperidine by a previously reported procedure.<sup>2</sup> All other commercially available reagents were purchased from Acros, Aldrich and Alfa Aesar Chemical Company and used without further purification unless otherwise stated. All reactions were carried out under an oxygen atmosphere unless otherwise stated. All solvents were dried according to standard procedures. <sup>1</sup>H NMR and <sup>13</sup>C NMR spectra were recorded in CDCl<sub>3</sub> or CD<sub>3</sub>OD on a Bruker Avance 600 spectrometer with TMS as internal standard (600 MHz <sup>1</sup>H, 150 MHz <sup>13</sup>C) at room temperature, and the chemical shifts (δ) were expressed in ppm and *J* values were given in Hz. The following abbreviations are used to indicate the multiplicity: s (singlet), d (doublet), t (triplet), m (multiplet), br (broad). EPR spectra were recorded at room temperature on a JEOL JES-FA200 EPR spectrometer (300K, 9.07 GHz, X-band). Mass analyses and HRMS were obtained on a Finnigan-LCQDECA mass spectrometer and a Bruker Daltonics Bio-TOF-Q mass spectrometer by the ESI method, respectively. LC-MS were obtained on Waters Acquity HPLC (PDA Detector)/Quattro Premier XE triquadrupole mass spectrometer. HPLC analysis was performed on Agilent 1200 with a DAD detector. Column chromatography was performed on silica gel (100-200 mesh).

## 2. Experimental section

### 2.1 Investigations on the catalytic activity of Cu(I) and Cu(II) salts under neat conditions

**Table S1.** Cu(I)-catalyzed reaction of **1a** and **2a** under neat conditions<sup>a</sup>

Reaction scheme: **1a** (acetophenone) + **2a** (piperidine)  $\xrightarrow[\text{O}_2, 50\text{ }^\circ\text{C, neat}]{\text{Cu(I) (5 mol \%)}}$  **3aa** (1-(1-oxopiperidin-2-yl)benzene)

| Entry | Catalyst                                              | Yield <sup>b</sup> (%) |
|-------|-------------------------------------------------------|------------------------|
| 1     | CuBr                                                  | 15                     |
| 2     | CuCl                                                  | 9                      |
| 3     | (CuOTf) <sub>2</sub> ·PhCH <sub>3</sub>               | 9                      |
| 4     | [Cu(CH <sub>3</sub> CN) <sub>4</sub> ]PF <sub>6</sub> | 8                      |
| 5     | CuI                                                   | 71                     |
| 6     | [Cu(CH <sub>3</sub> CN) <sub>4</sub> ]OTf             | 11 <sup>c</sup>        |

<sup>a</sup> Reaction conditions: **1a** (2 mmol), **2a** (6 mmol), catalyst (5 mol%), O<sub>2</sub> (balloon), 50 °C, 48 h. <sup>b</sup> Isolated yields. <sup>c</sup> 20 mol% catalyst was used.

Cu(I) salts were investigated in the model reaction of acetophenone with piperidine under neat conditions. As shown in Table S1, CuI turned out to be the best choice, while others such as CuBr, CuCl, (CuOTf)<sub>2</sub>·PhCH<sub>3</sub>, [Cu(CH<sub>3</sub>CN)<sub>4</sub>]PF<sub>6</sub>, and [Cu(CH<sub>3</sub>CN)<sub>4</sub>]OTf were less effective. The influence of the anions on the catalytic activity of Cu was not clear at the present stage. However, based on the further investigation on the mechanism by EPR experiments and previous reports,<sup>3</sup> we speculated that, compared with other Cu(I) salts, the better catalytic activity of CuI might be explained by the difference in the electron density on Cu. I anion is less electronegative than Cl,

Br, OTf, and PF<sub>6</sub> anions. The higher electron density on Cu might promote the reaction of Cu(I) with dioxygen to form superoxide radical (O<sub>2</sub><sup>•-</sup>) more easily. These indicate that CuI is more reactive than other Cu(I) salts in our reaction system.

**Table S2.** Cu(II)-catalyzed reaction of **1a** and **2a** under neat conditions<sup>a</sup>

| Entry | Catalyst                                              | Yield <sup>b</sup> (%) |
|-------|-------------------------------------------------------|------------------------|
| 1     | CuCl <sub>2</sub>                                     | 12                     |
| 2     | CuBr <sub>2</sub>                                     | 16                     |
| 3     | Cu(OTf) <sub>2</sub>                                  | 7                      |
| 4     | Cu(ClO <sub>4</sub> ) <sub>2</sub> ·6H <sub>2</sub> O | 3                      |
| 5     | Cu(OAc) <sub>2</sub>                                  | 2                      |

<sup>a</sup> Reaction conditions: **1a** (2 mmol), **2a** (6 mmol), catalyst (5 mol%), O<sub>2</sub> (balloon), 50 °C, 48 h. <sup>b</sup> Isolated yields.

As shown in Table S2, Cu(II) salts could also promote the reaction, albeit in low yields. Based on our experiments (more details see EPR experiments on pages S14-15) and previous reports,<sup>4</sup> we speculated that Cu(II) might be reduced to Cu(I) by enamine generated in our reaction system. Subsequently, the produced Cu(I) reacted with O<sub>2</sub> to produce Cu(II) and superoxide radical (O<sub>2</sub><sup>•-</sup>), which would undergo the subsequent reactions to generate α-ketoamides.

## 2.2 Investigations on the catalytic activity of CuI with different source and purity

The catalytic activity of CuI with different source and purity has been investigated in the model reaction of acetophenone with piperidine under standard conditions. As shown in Table S3, the products of α-ketoamides were almost equally obtained when three different kinds of CuI were used, which indicated that the source and purity of CuI have not obvious effect on the reaction efficiency.

**Table S3.** Studies on the catalytic activity of CuI with different source and purity<sup>a</sup>

| Entry | CuI        |         | Yield <sup>b</sup> (%) |
|-------|------------|---------|------------------------|
|       | Source     | Purity  |                        |
| 1     | Alfa Aesar | 99.999% | 87                     |
| 2     | Alfa Aesar | 98%     | 87                     |
| 3     | Acros      | 98%     | 86                     |

<sup>a</sup> Reaction conditions: **1a** (2mmol), **2a** (6 mmol), CuI (20 mol%), O<sub>2</sub>, 50 °C, 20 h. <sup>b</sup> Isolated yields.

## 2.3 Labeling experiments

### The experimental procedures and copies of HRMS spectra for isotope labeling experiments

(1) Oxygen exchange experiment of phenylglyoxal monohydrate with  $\text{H}_2^{18}\text{O}$  (10 equiv)

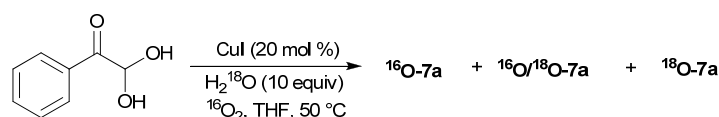

$\text{H}_2^{18}\text{O}$  (50 mg, 2.5 mmol) was added to a mixture of CuI (9.5 mg, 0.05 mmol) and phenylglyoxal monohydrate (38 mg, 0.25 mmol) in THF (2 mL) at room temperature under  $^{16}\text{O}_2$  (balloon). The resulting mixture was stirred at 50 °C for 20 h. Then, the reaction mixture was cooled to room temperature and purified by flash column chromatography on a short silica gel (petroleum ether/ethyl acetate = 2:1) to give the products, which were measured by HRMS.

## Elemental Composition Report

Page 1

### Single Mass Analysis

Tolerance = 100.0 PPM / DBE: min = -1.5, max = 50.0

Selected filters: None

Monoisotopic Mass, Even Electron Ions

74 formula(e) evaluated with 6 results within limits (up to 1 closest results for each mass)

Elements Used:

C: 0-200 H: 0-200 N: 0-1 16O: 0-2 18O: 0-2 Na: 0-1

23-Aug-2011

TOF MS ES+

110823\_D1194\_B\_2.2 (0.034) Cm (2:59)

3.84e4

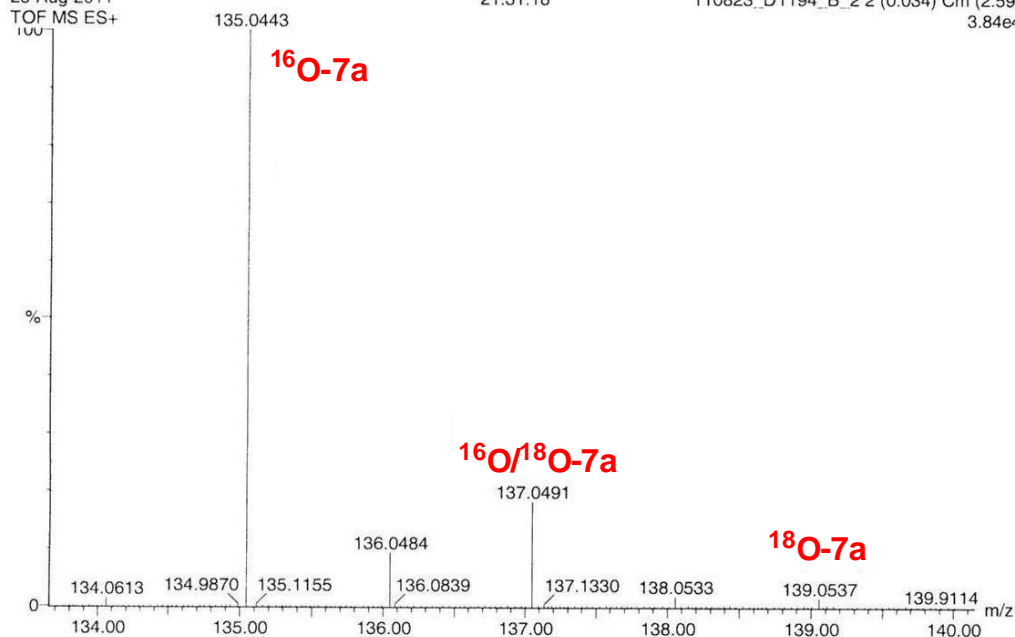

Minimum: -1.5  
Maximum: 5.0 100.0 50.0

| Mass     | Calc. Mass | mDa  | PPM  | DBE | i-FIT   | Formula          |
|----------|------------|------|------|-----|---------|------------------|
| 135.0443 | 135.0446   | -0.3 | -2.2 | 5.5 | 3201.4  | C8 H7 16O2       |
| 137.0491 | 137.0488   | 0.3  | 2.2  | 5.5 | 40.5    | C8 H7 16O<br>18O |
| 139.0537 | 139.0531   | 0.6  | 4.3  | 5.5 | 79665.6 | C8 H7 18O2       |

(2) Oxygen exchange experiment of  $^{16}\text{O}$ -3aa with  $\text{H}_2^{18}\text{O}$  (10 equiv)

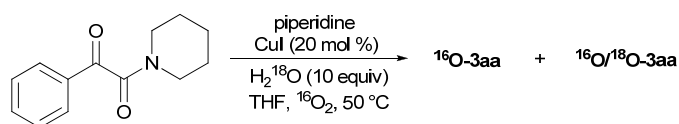

$\text{H}_2^{18}\text{O}$  (50 mg, 2.5 mmol) was added to a mixture of CuI (9.5 mg, 0.05 mmol),  $\alpha$ -ketoamide (54 mg, 0.25 mmol) and piperidine (75  $\mu\text{L}$ , 0.75 mmol) in THF (2 mL) at room temperature under  $^{16}\text{O}_2$  (balloon). The resulting mixture was stirred at 50 °C for 20 h. Then, the reaction mixture was directly determined by HRMS without purification by flash column chromatography.

## Elemental Composition Report

Page 1

### Single Mass Analysis

Tolerance = 100.0 PPM / DBE: min = -1.5, max = 50.0

Selected filters: None

Monoisotopic Mass, Even Electron Ions

1046 formula(e) evaluated with 45 results within limits (up to 1 closest results for each mass)

Elements Used:

C: 0-200 H: 0-200 N: 0-2  $^{16}\text{O}$ : 0-10  $^{18}\text{O}$ : 0-10 Na: 0-1

17-Aug-2011

TOF MS ES+

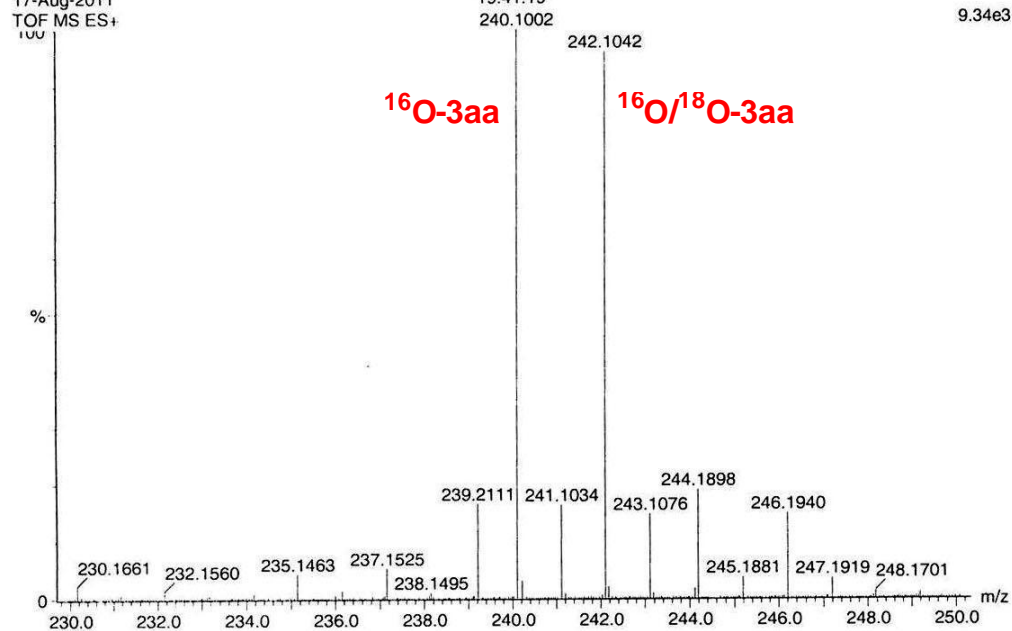

Minimum: -1.5  
Maximum: 5.0 100.0 50.0

| Mass     | Calc. Mass | mDa  | PPM  | DBE | i-FIT  | Formula                 |
|----------|------------|------|------|-----|--------|-------------------------|
| 240.1002 | 240.1000   | 0.2  | 0.8  | 6.5 | 4352.0 | C13 H15 N<br>16O2 Na    |
| 242.1042 | 242.1043   | -0.1 | -0.4 | 6.5 | 184.0  | C13 H15 N<br>16O 18O Na |

(3) Labeling experiment in the presence of 4 Å MS

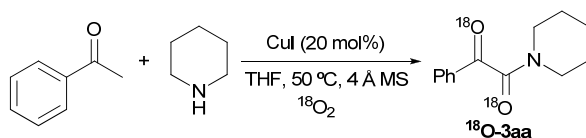

Acetophenone (117  $\mu$ L, 1 mmol) was added to a mixture of CuI (38 mg, 0.2 mmol), 4 Å MS (0.3 g) and piperidine (297  $\mu$ L, 3 mmol) in THF (1 mL) at room temperature under  $^{18}\text{O}_2$  (balloon). The resulting mixture was stirred at 50 °C for 20 h. The reaction mixture was directly determined by HRMS without purification by flash column chromatography.

## Elemental Composition Report

### Single Mass Analysis

Tolerance = 100.0 PPM / DBE: min = -1.5, max = 50.0

Selected filters: None

Monoisotopic Mass, Even Electron Ions

718 formula(e) evaluated with 31 results within limits (up to 1 closest results for each mass)

Elements Used:

C: 0-100 H: 0-100 N: 0-4  $^{16}\text{O}$ : 0-10  $^{18}\text{O}$ : 0-10 Na: 1-1

10:32:40

07-Feb-2010

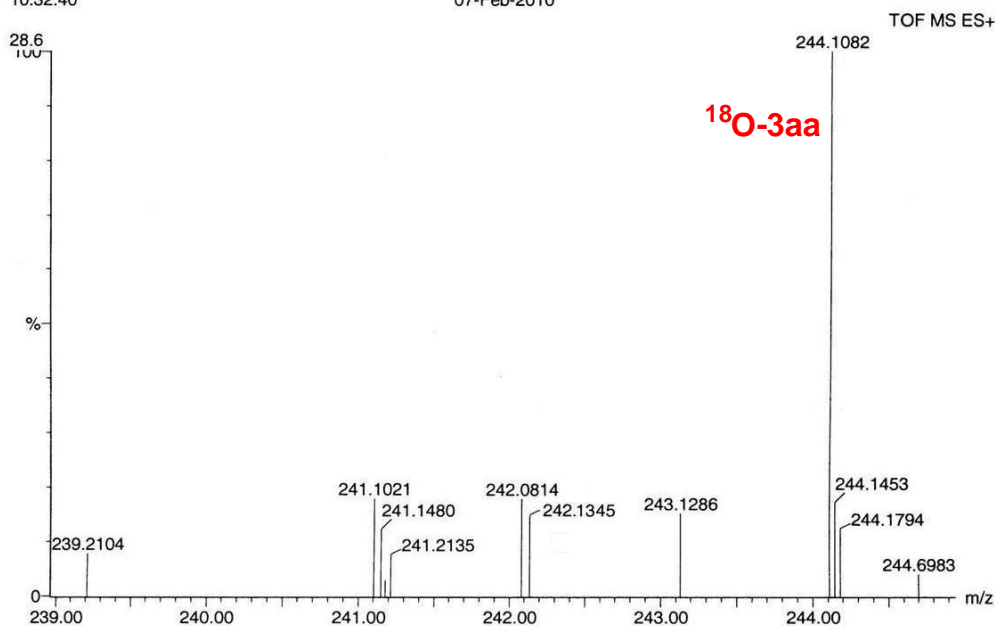

Minimum: -1.5  
Maximum: 5.0 100.0 50.0

| Mass     | Calc. Mass | mDa  | PPM  | DBE | i-FIT  | Formula              |
|----------|------------|------|------|-----|--------|----------------------|
| 244.1082 | 244.1085   | -0.3 | -1.2 | 6.5 | 1328.7 | C13 H15 N<br>18O2 Na |

(4) Oxygen exchange experiment in the presence of  $\text{H}_2^{16}\text{O}$  (5 mol%) under  $^{18}\text{O}_2$

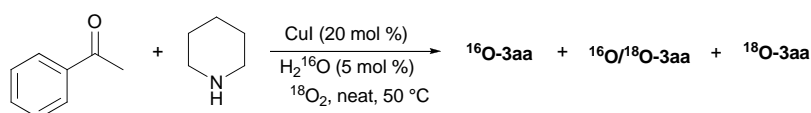

Acetophenone (234  $\mu\text{L}$ , 2 mmol) was added to a mixture of CuI (76 mg, 0.4 mmol), piperidine (594  $\mu\text{L}$ , 6 mmol) and  $\text{H}_2^{16}\text{O}$  (1.8 mg, 5 mol%) at room temperature under  $^{18}\text{O}_2$  (balloon). The resulting mixture was stirred at 50  $^\circ\text{C}$  for 20 h. Then, the reaction mixture was directly determined by HRMS without purification by flash column chromatography.

## Elemental Composition Report

Page 1

### Single Mass Analysis

Tolerance = 100.0 PPM / DBE: min = -1.5, max = 50.0

Selected filters: None

Monoisotopic Mass, Even Electron Ions

718 formula(e) evaluated with 44 results within limits (up to 3 closest results for each mass)

Elements Used:

C: 0-200 H: 0-200 N: 0-1  $^{16}\text{O}$ : 0-10  $^{18}\text{O}$ : 0-10 Na: 0-1

18-Aug-2011

20:28:01

TOF MS ES+

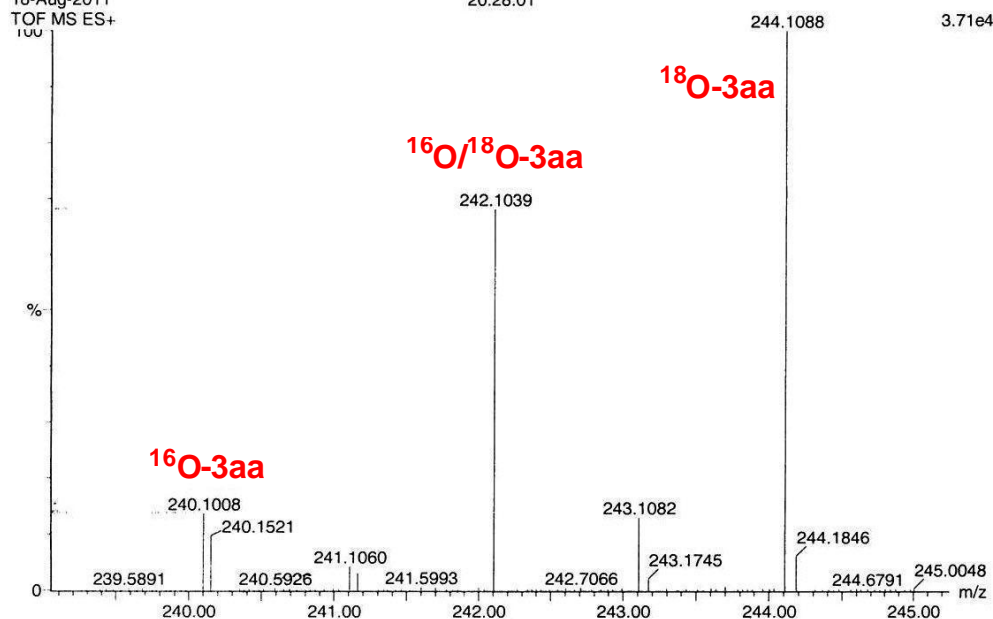

Minimum: -1.5  
Maximum: 50.0

| Mass     | Calc. Mass | mDa  | PPM  | DBE | i-FIT     | Formula                 |
|----------|------------|------|------|-----|-----------|-------------------------|
| 240.1008 | 240.1000   | 0.8  | 3.3  | 6.5 | 12753.2   | C13 H15 N<br>16O2 Na    |
| 242.1039 | 242.1043   | -0.4 | -1.7 | 6.5 | 901.1     | C13 H15 N<br>16O 18O Na |
| 244.1088 | 244.1085   | 0.3  | 1.2  | 6.5 | 1727470.6 | C13 H15 N<br>18O2 Na    |

(5) Oxygen exchange experiment in the presence of  $\text{H}_2^{18}\text{O}$  (5 mol%) under  $^{16}\text{O}_2$

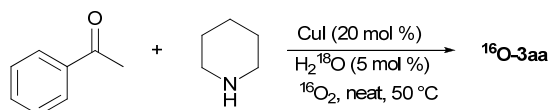

Acetophenone (234  $\mu\text{L}$ , 2 mmol) was added to a mixture of CuI (76 mg, 0.4 mmol), piperidine (594  $\mu\text{L}$ , 6 mmol) and  $\text{H}_2^{18}\text{O}$  (2 mg, 5 mol%) at room temperature under  $^{16}\text{O}_2$  (balloon). The resulting mixture was stirred at 50  $^\circ\text{C}$  for 20 h. Then, the reaction mixture was directly determined by HRMS without purification by flash column chromatography.

## Elemental Composition Report

Page 1

### Single Mass Analysis

Tolerance = 100.0 PPM / DBE: min = -1.5, max = 50.0

Selected filters: None

Monoisotopic Mass, Even Electron Ions

117 formula(e) evaluated with 10 results within limits (up to 1 closest results for each mass)

Elements Used:

C: 0-200 H: 0-200 N: 0-1  $^{16}\text{O}$ : 0-2  $^{18}\text{O}$ : 0-2 Na: 0-1

23-Aug-2011

21:18:50

110823\_D1194\_A 52 (0.889) Cm (1:59)

TOF MS ES+

8.40e4

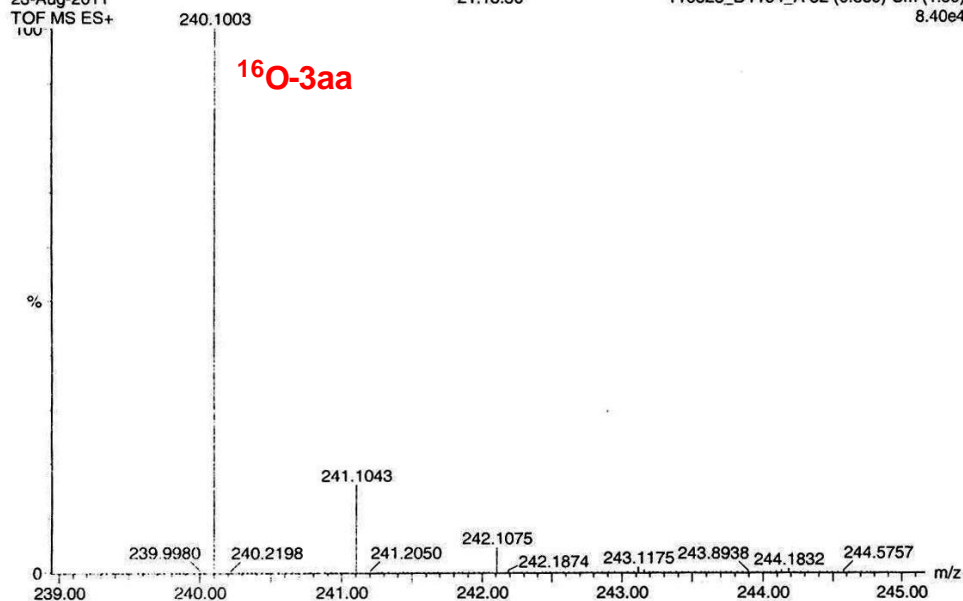

Minimum: -1.5  
Maximum: 50.0

| Mass     | Calc. Mass | mDa | PPM | DBE | i-FIT | Formula                                                            |
|----------|------------|-----|-----|-----|-------|--------------------------------------------------------------------|
| 240.1003 | 240.1000   | 0.3 | 1.2 | 6.5 | 856.7 | $\text{C}_{13}\text{H}_{15}\text{N}$<br>$^{16}\text{O}_2\text{Na}$ |



(6) Oxygen exchange experiment in the presence of  $\text{H}_2^{18}\text{O}$  (2 equiv) under  $^{16}\text{O}_2$

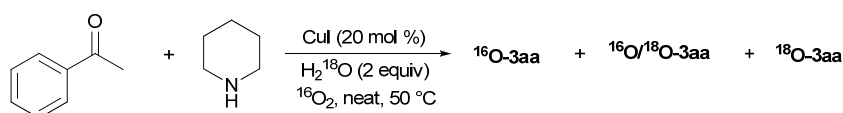

Acetophenone (234  $\mu\text{L}$ , 2 mmol) was added to a mixture of  $\text{CuI}$  (76 mg, 0.4 mmol), piperidine (594  $\mu\text{L}$ , 6 mmol) and  $\text{H}_2^{18}\text{O}$  (80 mg, 4 mmol) at room temperature under  $^{16}\text{O}_2$  (balloon). The resulting mixture was stirred at 50 °C for 20 h. Then, the reaction mixture was directly determined by HRMS without purification by flash column chromatography.

## Elemental Composition Report

Page 1

### Single Mass Analysis

Tolerance = 100.0 PPM / DBE: min = -1.5, max = 50.0

Selected filters: None

Monoisotopic Mass, Even Electron Ions

57 formula(e) evaluated with 5 results within limits (up to 1 closest results for each mass)

Elements Used:

C: 0-200 H: 0-200 N: 0-1  $^{16}\text{O}$ : 0-2  $^{18}\text{O}$ : 0-2 Na: 1-1

24-Aug-2011

TOF MS ES+

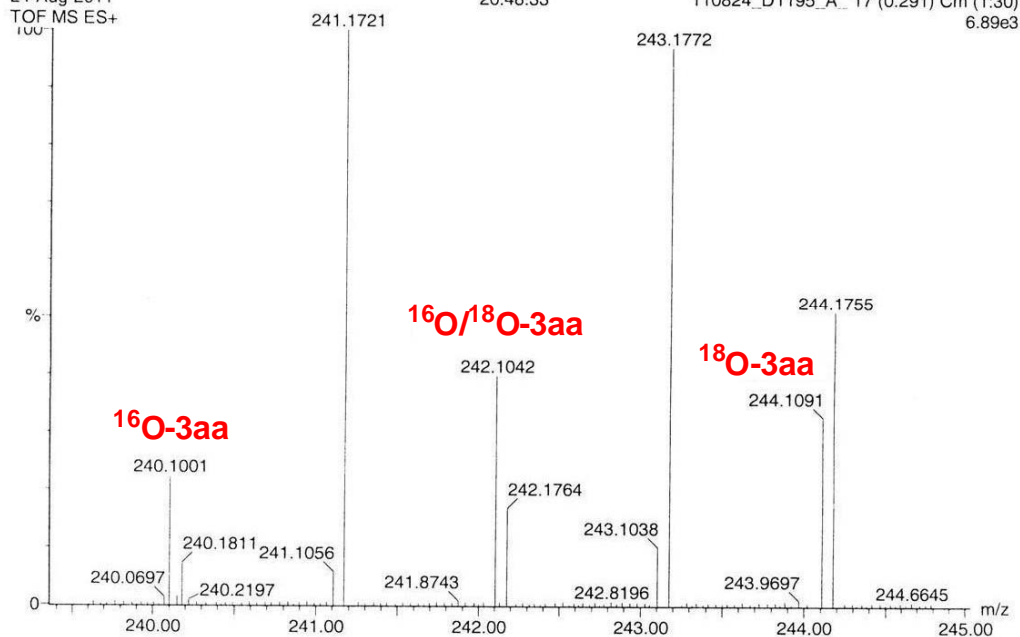

| Minimum: |            |      |       | -1.5 |          |                         |
|----------|------------|------|-------|------|----------|-------------------------|
| Maximum: |            | 5.0  | 100.0 | 50.0 |          |                         |
| Mass     | Calc. Mass | mDa  | PPM   | DBE  | i-FIT    | Formula                 |
| 240.1001 | 240.1000   | 0.1  | 0.4   | 6.5  | 1372.7   | C13 H15 N<br>16O2 Na    |
| 242.1042 | 242.1043   | -0.1 | -0.4  | 6.5  | 169.2    | C13 H15 N<br>16O 18O Na |
| 244.1091 | 244.1085   | 0.6  | 2.5   | 6.5  | 103990.8 | C13 H15 N<br>18O2 Na    |

## 2.4 Isolation of intermediate 7a

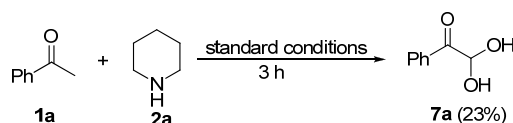

Acetophenone (234  $\mu\text{L}$ , 2 mmol) was added to a mixture of CuI (76mg, 0.4 mmol) and piperidine (594  $\mu\text{L}$ , 6 mmol) at room temperature under  $\text{O}_2$  (balloon). The resulting mixture was stirred at 50  $^\circ\text{C}$  for 3 h. Then, the reaction mixture was cooled to room temperature, filtered through silica gel, and washed with  $\text{CH}_2\text{Cl}_2$ . The resulting solution was concentrated in vacuo and the residue was purified by flash column chromatography (hexanes/ethyl acetate = 5:1) to afford the intermediate **7a** (70 mg, 23%).  $^1\text{H}$  NMR ( $\text{CD}_3\text{OD}$ , 600 MHz, ppm):  $\delta$  = 8.10-8.08 (dd,  $J$  = 8.4, 1.1 Hz, 2H), 7.67-7.63 (t,  $J$  = 7.5 Hz, 1H), 7.55-7.51 (t,  $J$  = 7.9 Hz, 2H), 5.57 (s, 1H);  $^{13}\text{C}$  NMR ( $\text{CD}_3\text{OD}$ , 150 MHz, ppm):  $\delta$  = 193.6, 132.9, 132.6, 128.3, 127.4, 94.3. The NMR characterization data of **7a** is coincidence with that of commercially available reagent.

## 2.5 Conversion of 7a into $\alpha$ -ketoamide 3aa

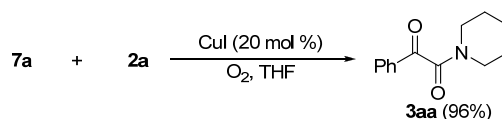

Phenylglyoxal monohydrate (38 mg, 0.25 mmol) was added to a mixture of CuI (9 mg, 0.05 mmol) and piperidine (74  $\mu\text{L}$ , 0.75 mmol) in THF (1 mL) at room temperature under  $\text{O}_2$  (balloon). The resulting mixture was stirred at 50  $^\circ\text{C}$  for 1 h. Then the reaction mixture was cooled to room temperature, filtered through silica gel, and washed with  $\text{CH}_2\text{Cl}_2$ . The resulting solution was concentrated in vacuo and the residue was purified by flash column chromatography (hexanes/ethyl acetate = 5:1) to yield the product **3aa** (52 mg, 96%).

## 2.6 The variation of phenylglyoxal intermediate and $\alpha$ -ketoamide with reaction time in the reaction of acetophenone 1a with piperidine 2a.

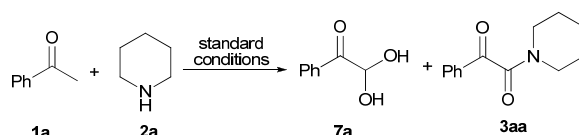

The experimental conditions of HPLC analysis: Agilent 1200, DAD detector: 220 nm; Luna  $\text{C}_{18}$  (4.6 $\times$ 150mm, 5 $\mu\text{m}$ ); 25 $^\circ\text{C}$ . flow rate: 1 mL/min; The mobile phase consisted of A (Water) and B (acetonitrile), gradient elution: 0-20 min, 10-40% B (acetonitrile); 20-30 min, 40% B (acetonitrile).

Eight parallel reactions of acetophenone (2 mmol) and piperidine (6 mmol) was performed under standard conditions. The reactions were stopped at 0.5 h, 1 h, 2 h, 3 h, 6 h, 12 h, 20 h, 24 h, cooled to room temperature, and diluted with methanol to 100 mL, respectively. The diluted mixtures were detected by HPLC via external standard method.

The amount of phenylglyoxal monohydrate **7a** and  $\alpha$ -ketoamide **3aa** varied with reaction time are demonstrated in Fig. S1. At the beginning of the reaction (0.5 h), phenyl glyoxal **7a** intermediate was produced in 40% yield along with a trace amount of product  $\alpha$ -ketoamide. The amount of phenyl glyoxal intermediate gradually decreased and the product increased with the prolonging of reaction time. After 6 h, only a small amount

of phenyl glyoxal intermediate was detected and the rate of product formation has also become slow. After 20 h, the amount of product almost did not increase.

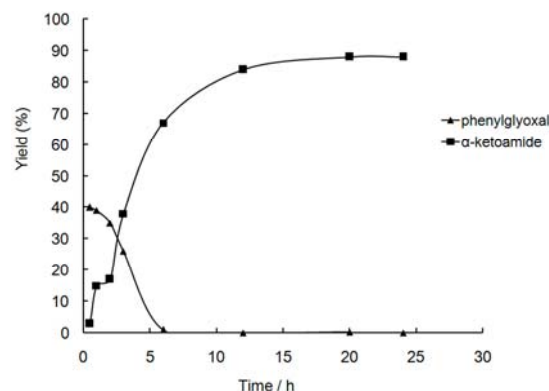

**Fig. S1** The variation of phenylglyoxal intermediate and  $\alpha$ -ketoamide with reaction time in the reaction of acetophenone (**1a**) with piperidine (**2a**). Yields of phenylglyoxal and  $\alpha$ -ketoamide were determined by HPLC.

## 2.7 Conversion of enamine **4a** into **3aa**

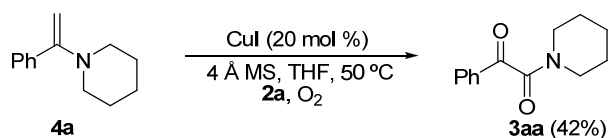

Enamine **4a** (47 mg, 0.25 mmol) was added to a mixture of CuI (9.5 mg, 0.05 mmol), 4 Å MS (50 mg), piperidine (50  $\mu$ L, 0.5 mmol) in THF (1 mL) at room temperature under O<sub>2</sub> (balloon). The resulting mixture was stirred at 50 °C for 20 h. Then the reaction mixture was cooled to room temperature, filtered through silica gel, and washed with CH<sub>2</sub>Cl<sub>2</sub>. The resulting solution was concentrated in vacuo and the residue was purified by flash column chromatography (hexanes/ethyl acetate = 5:1) to yield the product **3aa** (23 mg, 42%).

## 2.8 EPR experiments

EPR spectra were recorded at room temperature on a JEOL JES-FA200 EPR spectrometer (300K, 9.07 GHz, X-band). Typical instrument settings were as follows: microwave power, 1 mW (O<sub>2</sub><sup>•−</sup>) and 2 mW (Cu<sup>2+</sup>); field set, 3240 (O<sub>2</sub><sup>•−</sup>) and 3230 (Cu<sup>2+</sup>); sweep width, 3100-3300 G (O<sub>2</sub><sup>•−</sup>) and 2200-4400 G (Cu<sup>2+</sup>); modulation frequency, 100 kHz; modulation amplitude, 1G (O<sub>2</sub><sup>•−</sup>) and 3.5 G (Cu<sup>2+</sup>); sweep time, 60 s.

**Table S4.** EPR investigation

| entry | EPR sample                                                                                                     | signals of<br>DMPO-OO(H) | superoxide<br>radical | concentration of<br>DMPO-OO(H) (mM) |
|-------|----------------------------------------------------------------------------------------------------------------|--------------------------|-----------------------|-------------------------------------|
| 1     | standard sample (acetophenone (0.25 mmol),<br>piperidine (0.75 mmol), CuI (20 mol%), O <sub>2</sub> ,<br>DMPO) | yes                      | Yes                   | 1.09                                |
| 2     | standard sample without CuI                                                                                    | no                       | no                    | -                                   |
| 3     | standard sample without piperidine                                                                             | no                       | no                    | -                                   |
| 4     | standard sample without CuI and piperidine                                                                     | no                       | no                    | -                                   |
| 5     | standard sample without acetophenone                                                                           | yes                      | yes                   | 1.05                                |

Reaction conditions: The mixture of acetophenone (29  $\mu$ L, 0.25 mmol), piperidine (75  $\mu$ L, 0.75 mmol) and CuI (9.5 mg, 0.05 mmol) in THF (2 mL) was stirred at 50 °C under O<sub>2</sub> for 30 min. 30  $\mu$ L of the reaction mixture was taken out into a small

tube, followed by the addition of 10  $\mu\text{L}$  DMPO (0.1 M). Then, the resulting mixture was tested by EPR.

Measured concentration of DMPO-OO(H) was determined by the following formula:

$$C = \{[(S_{\text{DMPO-OO(H)}}/S_{\text{TEMPOL}}) \times (2.408 \times 10^{15})] / (6.02 \times 10^{23})\} / V$$

Notes:

The double integration area of standard sample:  $S_{\text{DMPO-OO(H)}} = 38.21$

The double integration area of standard sample without acetophenone:  $S'_{\text{DMPO-OO(H)}} = 36.86$

The double integration area of TEMPOL (400  $\mu\text{L}$ , 10  $\mu\text{M}$ ):  $S_{\text{TEMPOL}} = 3.5$

The number of spins of TEMPOL (400  $\mu\text{L}$ , 10  $\mu\text{M}$ ) was  $2.408 \times 10^{15}$

$V = 40 \mu\text{L}$

The double integration area of sample was obtained by an EPR software (version: 3.3.34 XB) of JEOL JES-FA200 EPR spectrometer

The standard sample TEMPOL was provided by JEOL company.

(1) When the reaction of acetophenone (**1a**) with piperidine (**2a**) was recorded for the EPR spectra using 5,5-dimethyl-1-pyrroline *N*-oxide (DMPO) as a spin trap, the signals corresponding to DMPO-OO(H) were observed (EPR spectrum see Fig. S2). The calculated hyperfine splittings are  $g_0$  (2.006),  $a_N$  (15.8 G),  $\alpha_H^\beta$  (13.4 G), and  $\alpha_H^\gamma$  (1.9 G), which indicated the presence of the superoxide radical during the transformation.

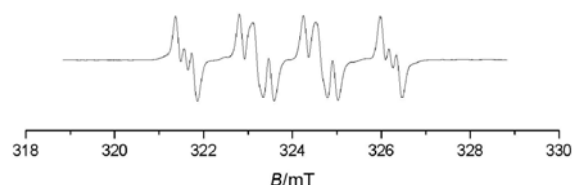

**Fig. S2** EPR spectrum obtained from the reaction system: acetophenone (29  $\mu\text{L}$ , 0.25 mmol), piperidine (75  $\mu\text{L}$ , 0.75 mmol) and CuI (9.5 mg, 0.05 mmol) in THF (2 mL) under  $\text{O}_2$ . The reaction mixture was stirred at 50  $^\circ\text{C}$  for 30 min. 30  $\mu\text{L}$  of the reaction mixture was taken out into a small tube, followed by the addition of 10  $\mu\text{L}$  DMPO (0.1 M). Then, this mixture was tested by EPR.

(2) Definitely, the signals completely disappeared with the addition of superoxide dismutase (SOD), which further confirmed the existence of superoxide radical in the present reaction system (EPR spectrum see Fig. S3).

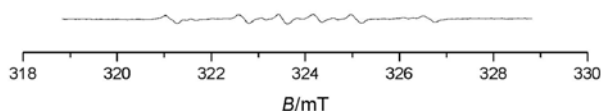

**Fig. S3** EPR spectrum obtained from the reaction system: acetophenone (29  $\mu\text{L}$ , 0.25 mmol), piperidine (75  $\mu\text{L}$ , 0.75 mmol) and CuI (9.5 mg, 0.05 mmol) in THF (2 mL) under  $\text{O}_2$ . The reaction mixture was stirred at 50  $^\circ\text{C}$  for 30 min. 30  $\mu\text{L}$  of the reaction mixture was taken out into a small tube, mixed well with 10  $\mu\text{L}$  SOD (0.1 mg/mL), followed by the addition of 10  $\mu\text{L}$  DMPO (0.1 M). Then, this mixture was tested by EPR.

(3) When the EPR was tested in the absence of CuI catalyst (EPR spectrum see Fig. S4) or piperidine (EPR

spectrum see Fig. S5), the signals corresponding to DMPO–OO(H) did not appear, which indicated that the superoxide radical was produced in the presence of Cu(I) catalyst and amine.

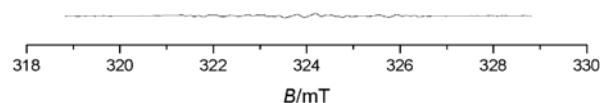

**Fig. S4** EPR spectrum obtained from the reaction system: acetophenone (29  $\mu$ L, 0.25 mmol) and piperidine (75  $\mu$ L, 0.75 mmol) in THF (2 mL) under  $O_2$ . The reaction mixture was stirred at 50  $^{\circ}$ C for 30 min. 30  $\mu$ L of the reaction mixture was taken out into a small tube, followed by the addition of 10  $\mu$ L DMPO (0.1 M). Then, this mixture was tested by EPR.

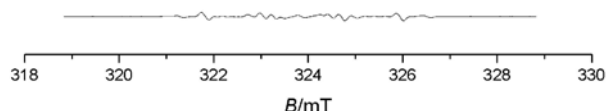

**Fig. S5** EPR spectrum obtained from the reaction system: acetophenone (29  $\mu$ L, 0.25 mmol) and CuI (9.5 mg, 0.05 mmol) in THF (2 mL) under  $O_2$ . The reaction mixture was stirred at 50  $^{\circ}$ C for 30 min. 30  $\mu$ L of the reaction mixture was taken out into a small tube, followed by the addition of 10  $\mu$ L DMPO (0.1 M). Then, this mixture was tested by EPR.

(4) Indeed, when the CuI was stirred with piperidine under dioxygen, the signals corresponding to DMPO–OO(H) were observed through EPR experiment. The calculated hyperfine splittings are  $g_0$  (2.006),  $a_N$  (15.8 G),  $a_H^{\beta}$  (13.5 G), and  $a_H^{\gamma}$  (1.8 G).

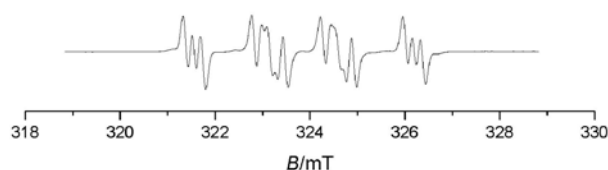

**Fig. S6** EPR spectrum obtained from the reaction system: piperidine (75  $\mu$ L, 0.75 mmol) and CuI (9.5 mg, 0.05 mmol) in THF (2 mL) under  $O_2$ . The reaction mixture was stirred at 50  $^{\circ}$ C for 30 min. 30  $\mu$ L of the reaction mixture was taken out into a small tube, followed by the addition of 10  $\mu$ L DMPO (0.1 M). Then, this mixture was tested by EPR.

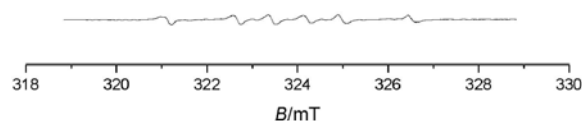

**Fig. S7** EPR spectrum obtained from the reaction system: piperidine (75  $\mu$ L, 0.75 mmol) and CuI (9.5 mg, 0.05 mmol) in THF (2 mL) under  $O_2$ . The reaction mixture was stirred at 50  $^{\circ}$ C for 30 min. 30  $\mu$ L of the reaction mixture was taken out into a small tube, mixed well with 10  $\mu$ L SOD (0.1 mg/mL), followed by the addition of 10  $\mu$ L DMPO (0.1 M). Then, this mixture was tested by EPR.

(5) Importantly, the signals of Cu(II) were also detected by EPR from the standard reaction system (EPR spectrum see Fig. S8) and the mixtures of CuI with piperidine under dioxygen (EPR spectrum see Fig. S9), which indicated that Cu(I) was oxidized into Cu(II) in our reaction system.

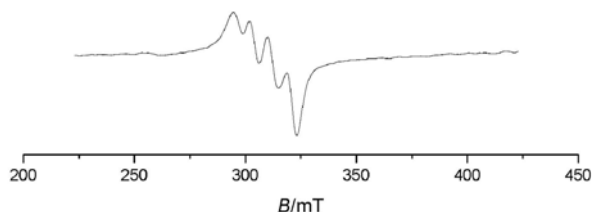

**Fig. S8** EPR spectrum obtained from the reaction system: acetophenone (29  $\mu\text{L}$ , 0.25 mmol), piperidine (75  $\mu\text{L}$ , 0.75 mmol) and CuI (9.5 mg, 0.05 mmol) in THF (2 mL) under  $\text{O}_2$ . The reaction mixture was stirred at 50  $^\circ\text{C}$  for 30 min, and tested by EPR.

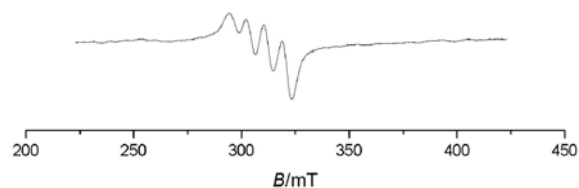

**Fig. S9** EPR spectrum obtained from the reaction system: piperidine (75  $\mu\text{L}$ , 0.75 mmol) and CuI (9.5 mg, 0.05 mmol) in THF (2 mL) under  $\text{O}_2$ . The reaction mixture was stirred at 50  $^\circ\text{C}$  for 30 min, and tested by EPR.

(6) When the reactions of **1a** with **2a** catalyzed by  $\text{CuBr}_2$  or  $\text{CuCl}_2$  were performed under standard conditions, superoxide radical ( $\text{O}_2^{\cdot-}$ ) were detected by EPR experiments (EPR spectra see Fig. S10 and S11). Superoxide radical ( $\text{O}_2^{\cdot-}$ ) was also detected by EPR analysis when the reaction of enamine **4a** with  $\text{CuBr}_2$  was performed in the presence of piperidine in dry THF under oxygen atmosphere (EPR spectrum see Fig. 12). While, superoxide radical was not detected when  $\text{CuBr}_2$  was directly stirred with piperidine in dry THF under oxygen atmosphere. Based on our experiments and previous reports about the reduction of Cu(II) by enamine or enol ether to Cu(I),<sup>21f,25</sup> we speculated that Cu(II) might be reduced to Cu(I) by enamine generated in our reaction system. Subsequently, the produced Cu(I) reacted with  $\text{O}_2$  to produce Cu(II) and superoxide radical ( $\text{O}_2^{\cdot-}$ ).

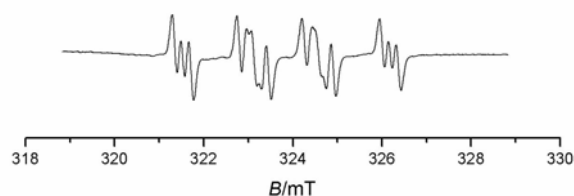

**Fig. S10** EPR spectrum obtained from the reaction system: acetophenone (29  $\mu\text{L}$ , 0.25 mmol), piperidine (75  $\mu\text{L}$ , 0.75 mmol) and  $\text{CuBr}_2$  (11 mg, 0.05 mmol) in THF (2 mL) under  $\text{O}_2$ . The reaction mixture was stirred at 50  $^\circ\text{C}$  for 30 min. 30  $\mu\text{L}$  of the reaction mixture was taken out into a small tube, followed by the addition of 10  $\mu\text{L}$  DMPO (0.1 M). Then, this mixture was tested by EPR.

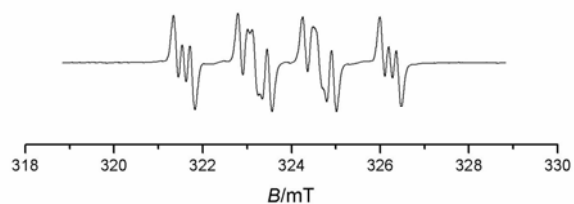

**Fig. S11** EPR spectrum obtained from the reaction system: acetophenone (29  $\mu\text{L}$ , 0.25 mmol), piperidine (75  $\mu\text{L}$ , 0.75 mmol)

and  $\text{CuCl}_2$  (7 mg, 0.05 mmol) in THF (2 mL) under  $\text{O}_2$ . The reaction mixture was stirred at 50 °C for 30 min. 30  $\mu\text{L}$  of the reaction mixture was taken out into a small tube, followed by the addition of 10  $\mu\text{L}$  DMPO (0.1 M). Then, this mixture was tested by EPR.

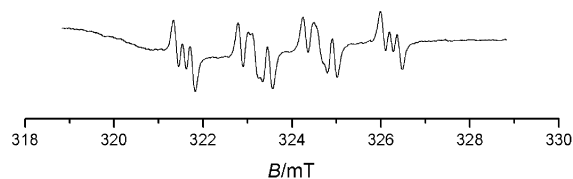

**Fig. S12** EPR spectrum obtained from the reaction system: enamine (47mg, 0.25 mmol), piperidine (50  $\mu\text{L}$ , 0.5 mmol), 4Å MS (55mg) and  $\text{CuBr}_2$  (11 mg, 0.05 mmol) in THF (2 mL) under  $\text{O}_2$ . The reaction mixture was stirred at 50 °C for 30 min. 30  $\mu\text{L}$  of the reaction mixture was taken out into a small tube, followed by the addition of 10  $\mu\text{L}$  DMPO (0.1 M). Then, this mixture was tested by EPR.

## 2.9 LC-MS analysis experiments

### The experimental conditions of LC-MS analysis:

HPLC: Waters BEH C18 column, 2.1×100 mm, 1.7  $\mu\text{m}$ ; PDA detector: 220 nm; 30 °C; flow rate: 0.25 mL/min; The mobile phase consisted of A (Water with 0.1% acetic acid) and B (methanol), gradient elution: 50% B(methanol) or 75% B(methanol).

MS: Capillary 3.0 kv; Cone 40.v; Extraction cone 3 v; Source temperature 100 °C; Desolvation temperature 250 °C; Cone gas flow 40 L/h; Desolvation gas flow 600 L/h. Scan 100~800 m/z.

Amide (**9ab**) could be isolated (8% yield) from the reaction system of acetophenone (**1a**) with morpholine (**2b**) in the standard conditions.

Copies of  $^1\text{H}$  NMR and  $^{13}\text{C}$  NMR of isolated amide (**9ab**).

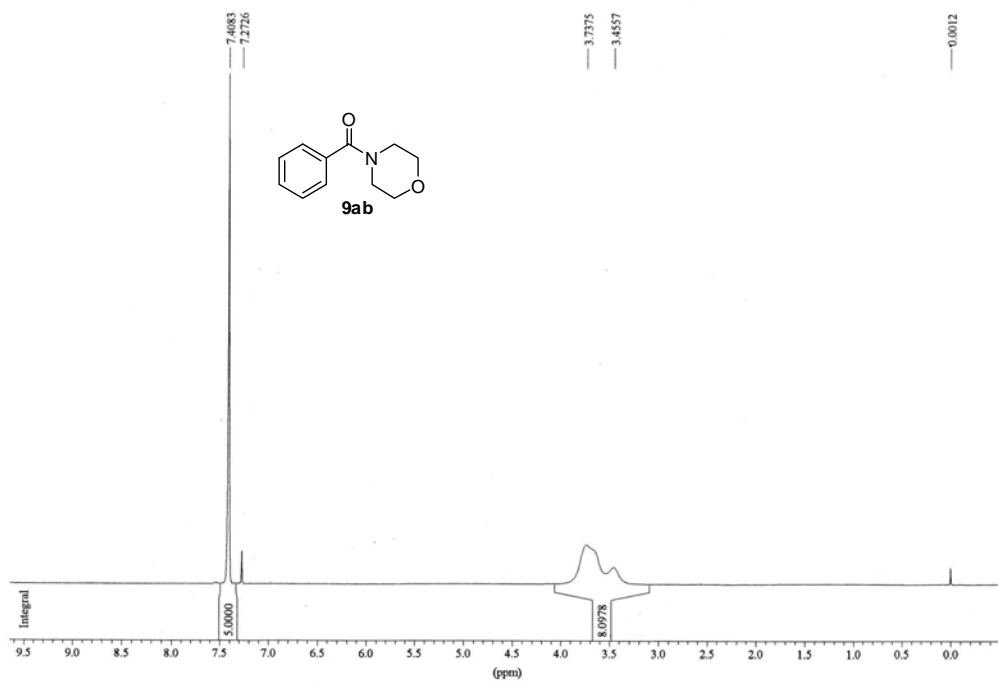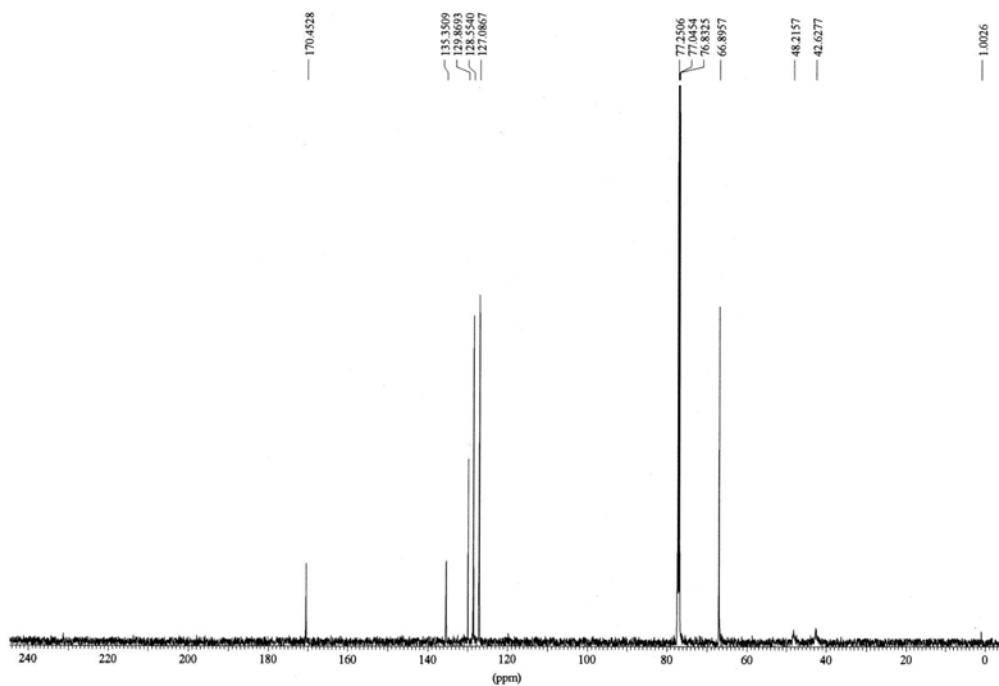



Copies of LC-MS spectra

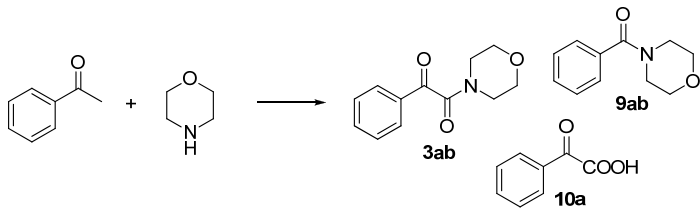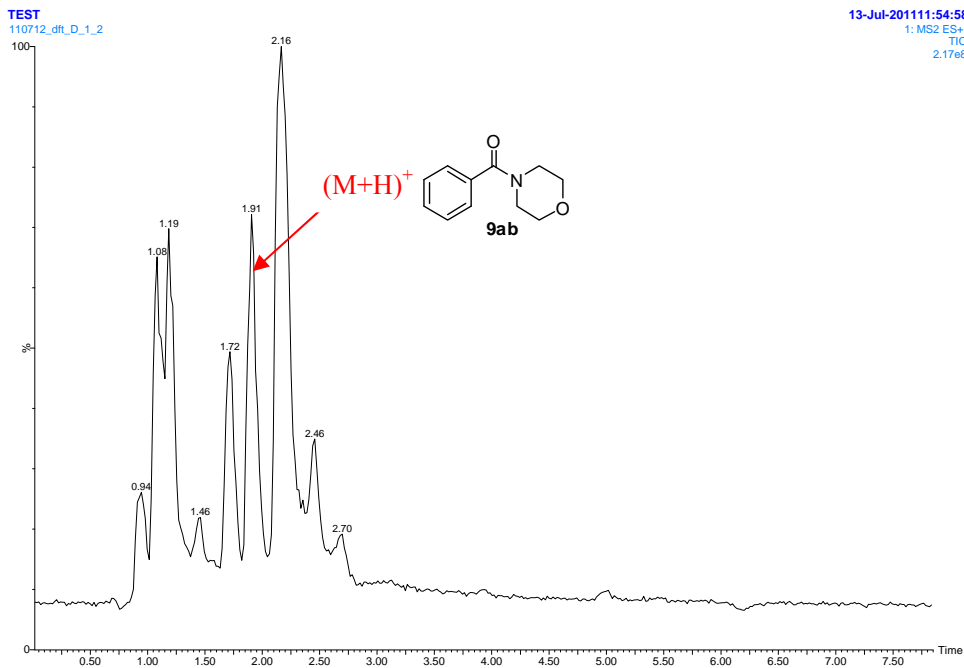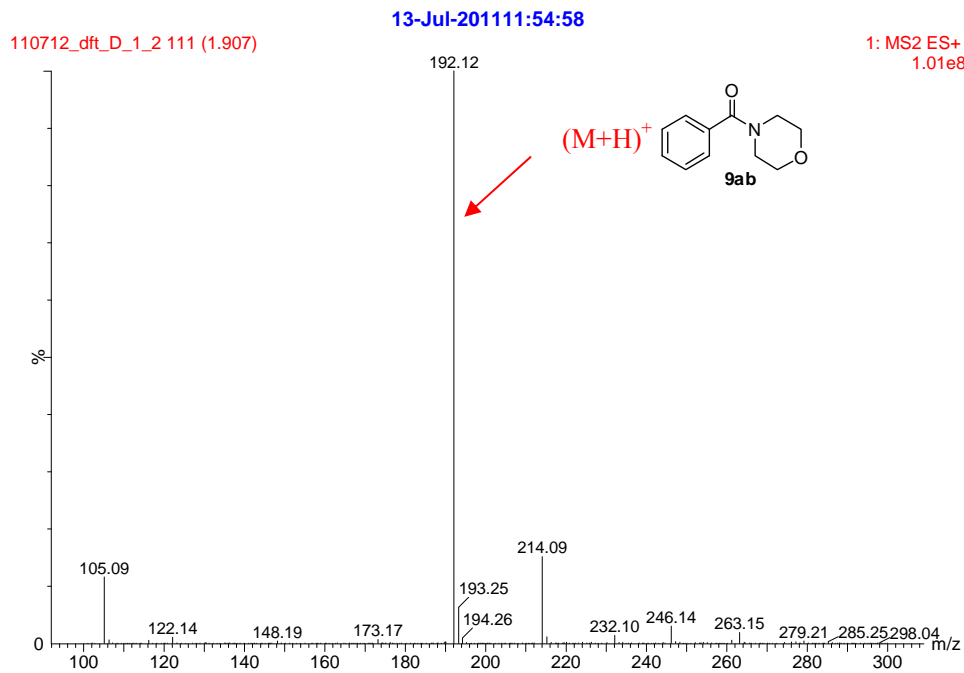

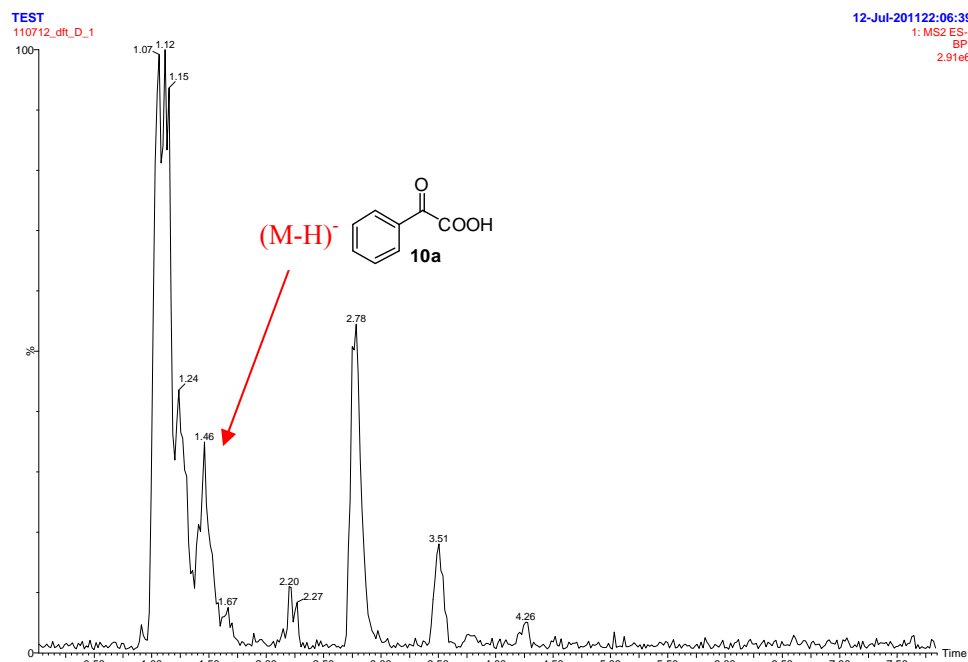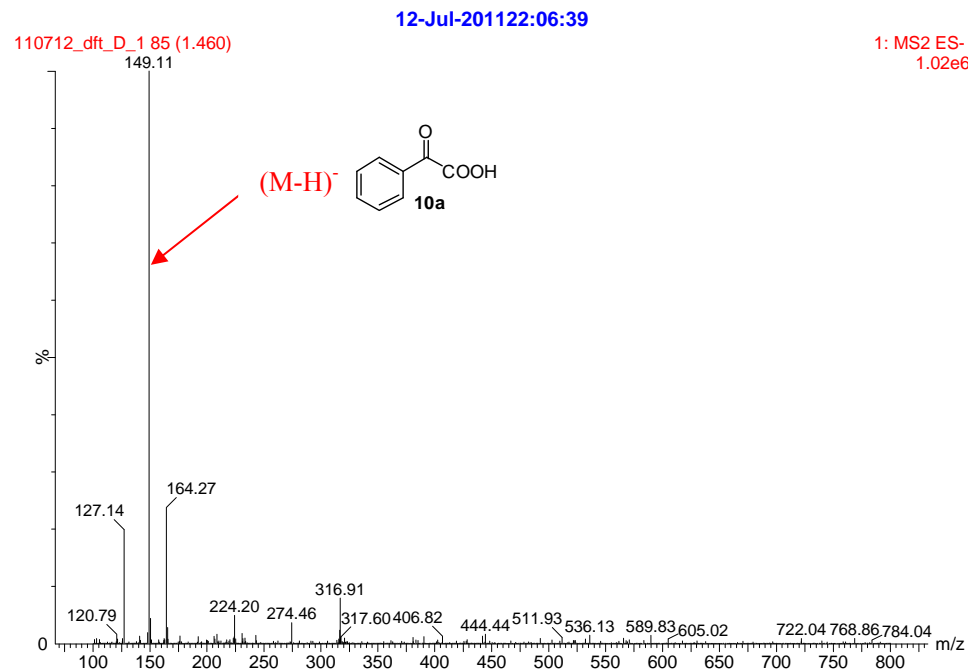

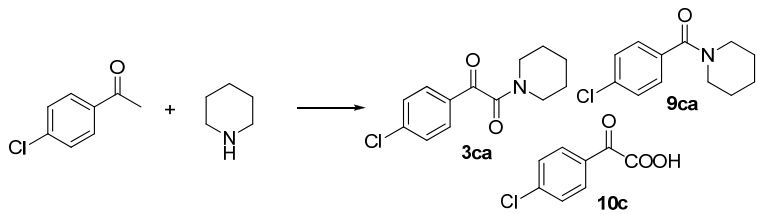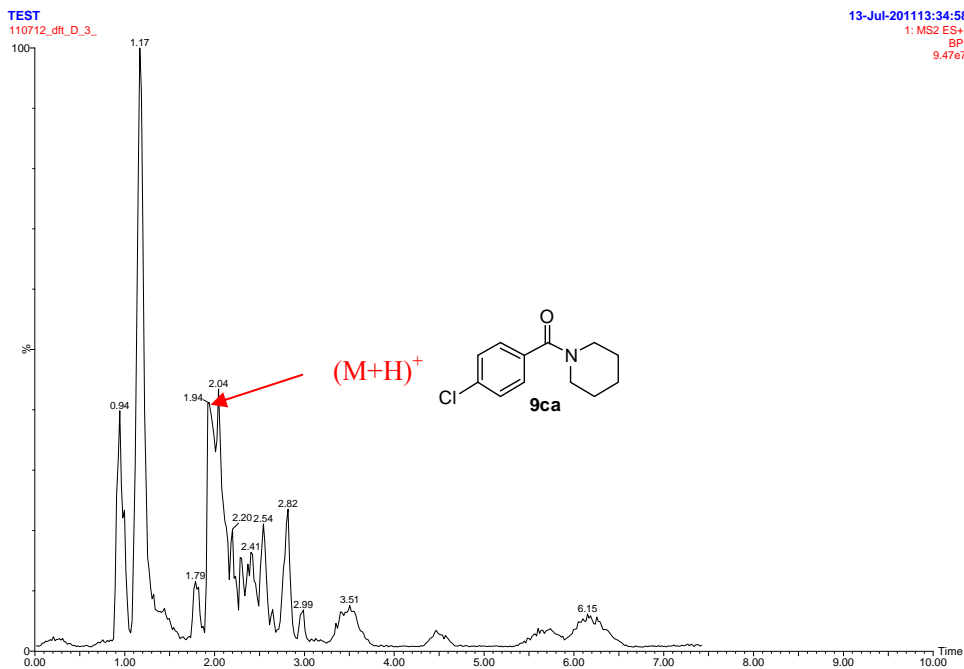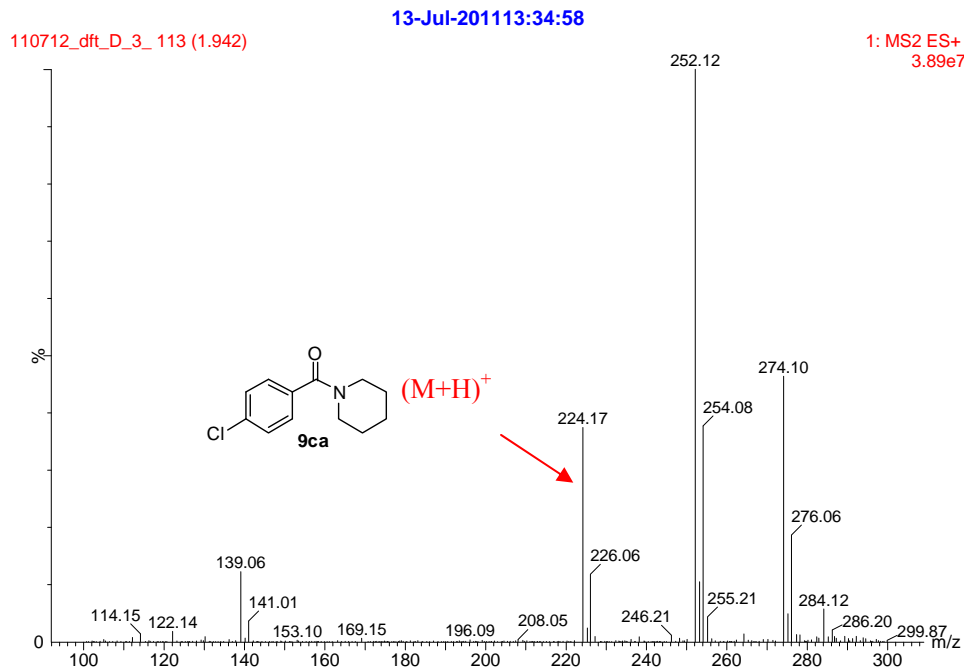

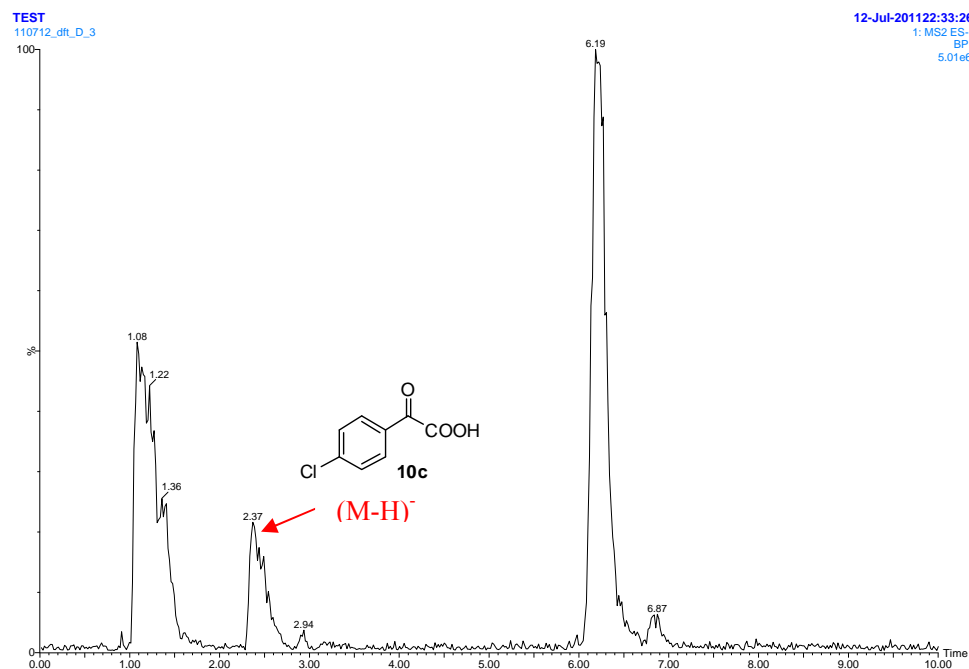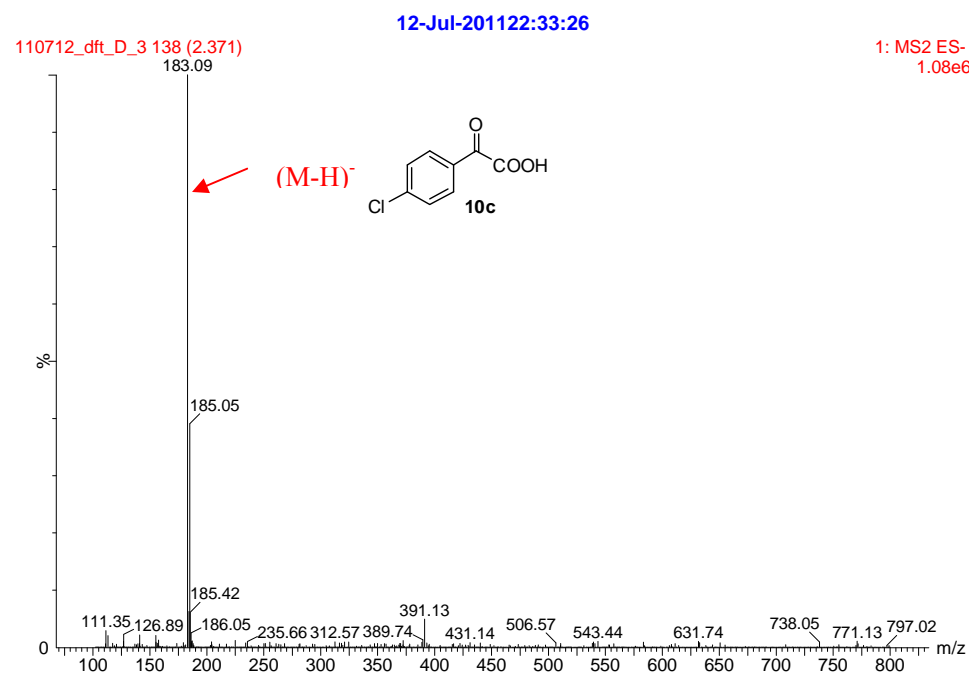

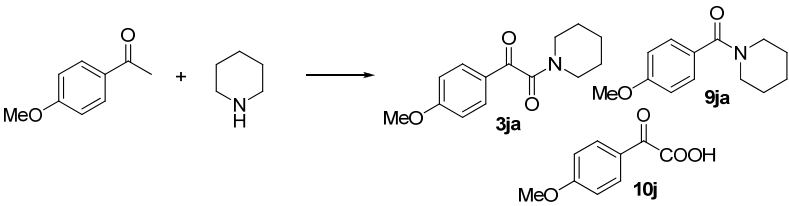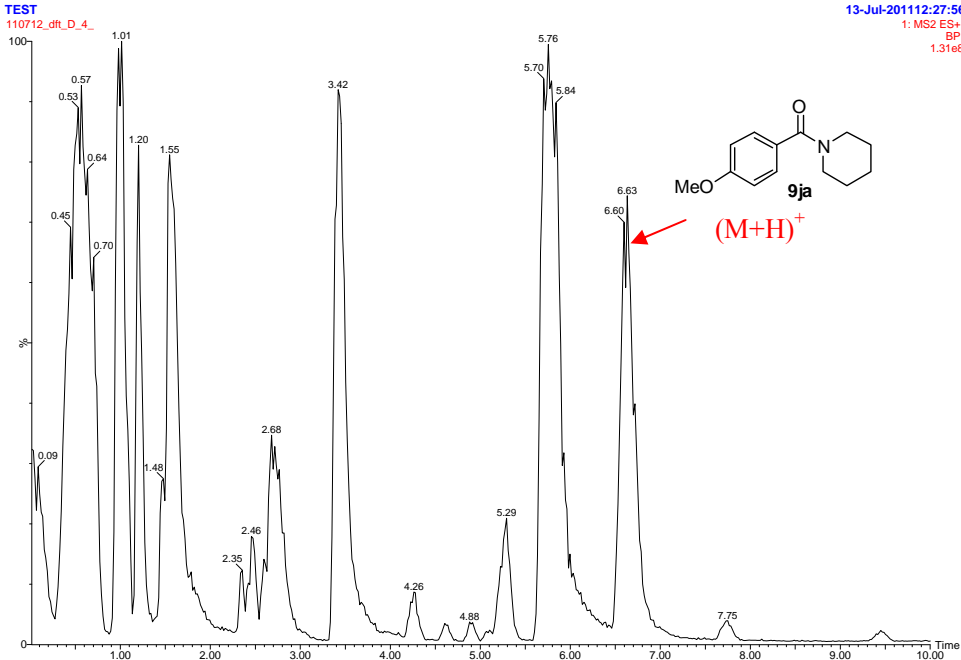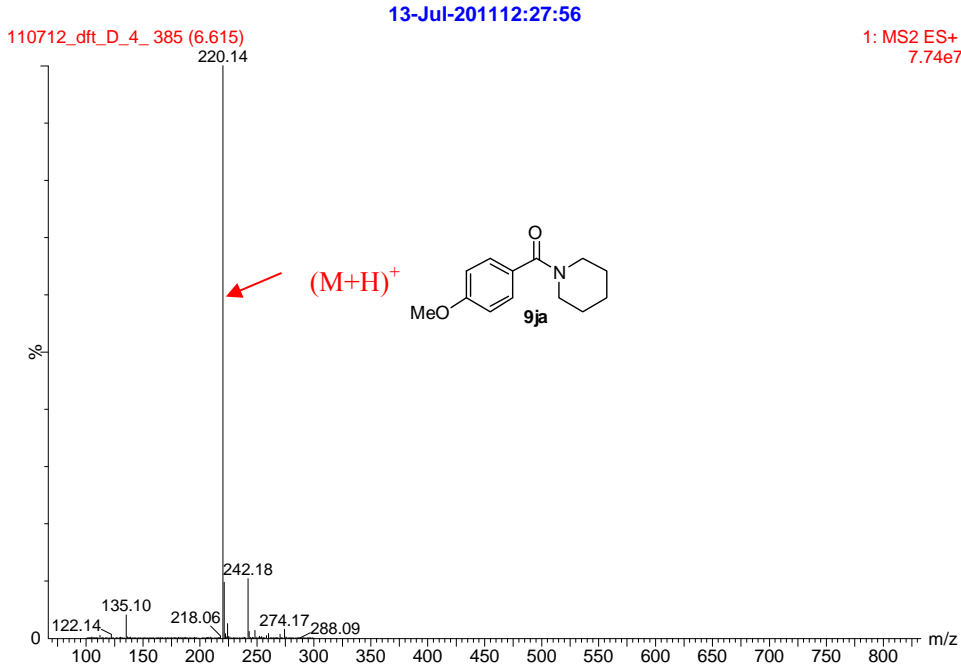

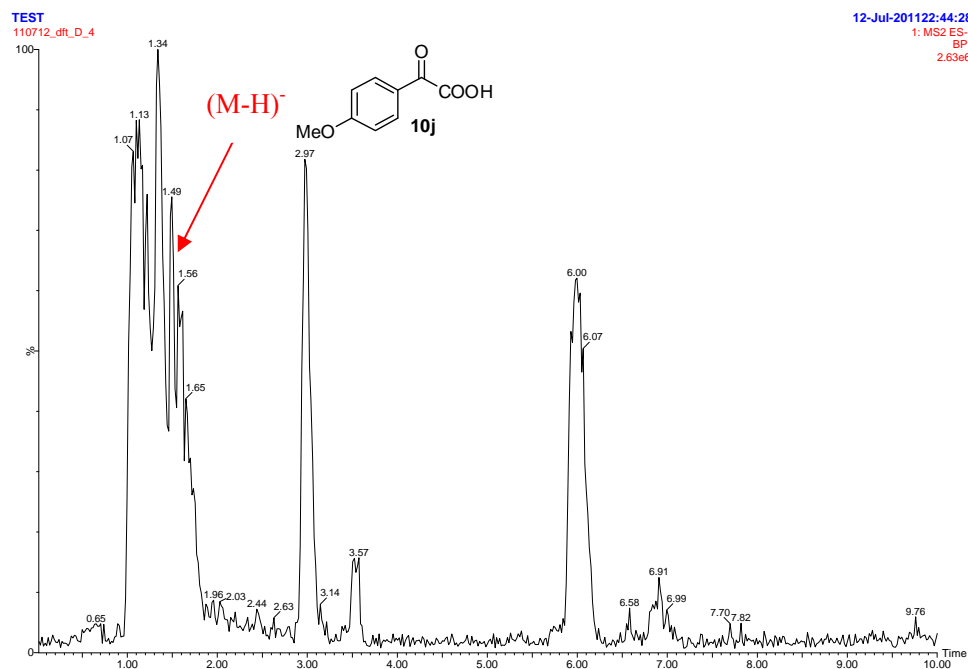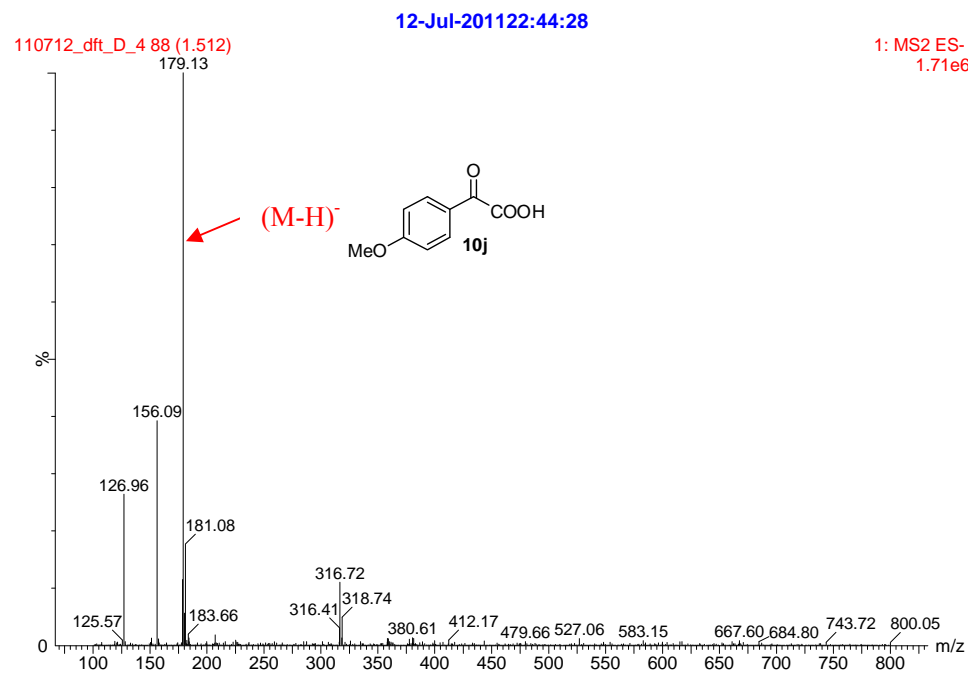

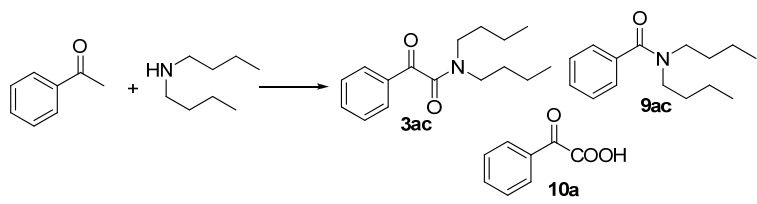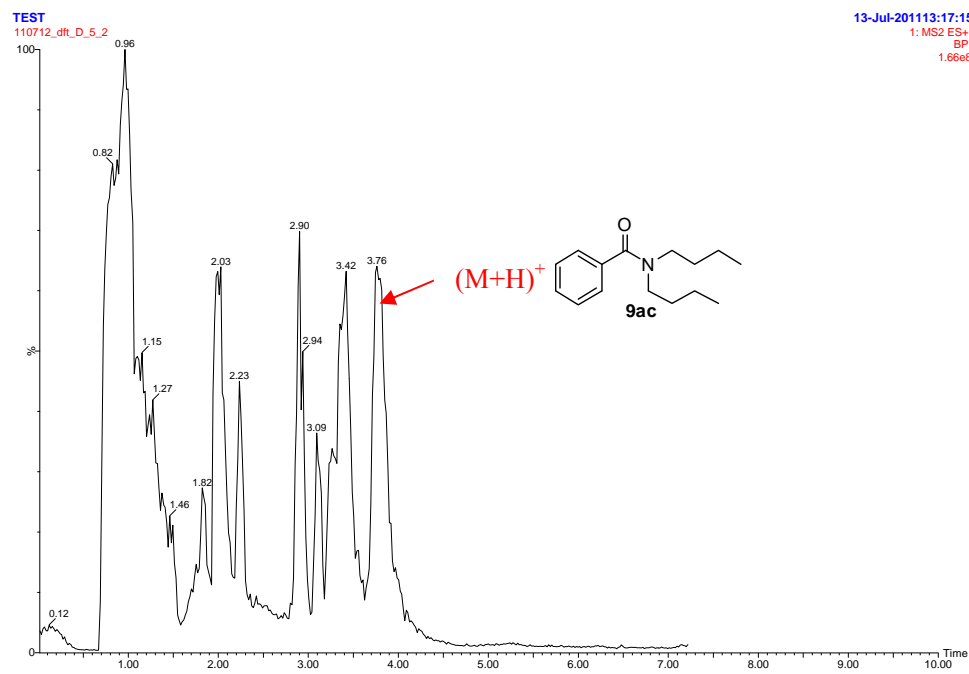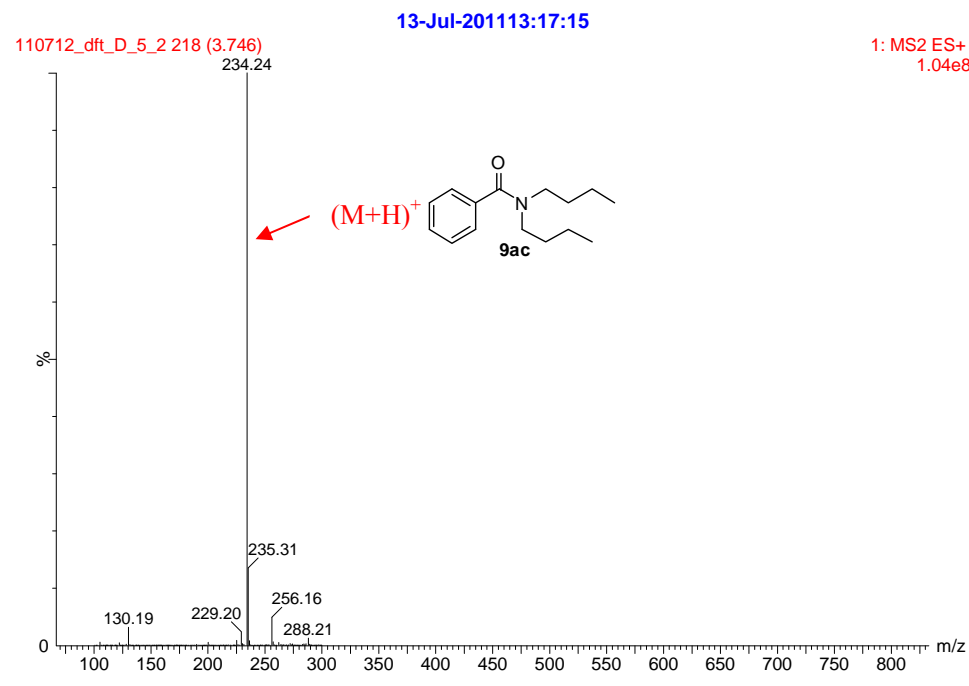

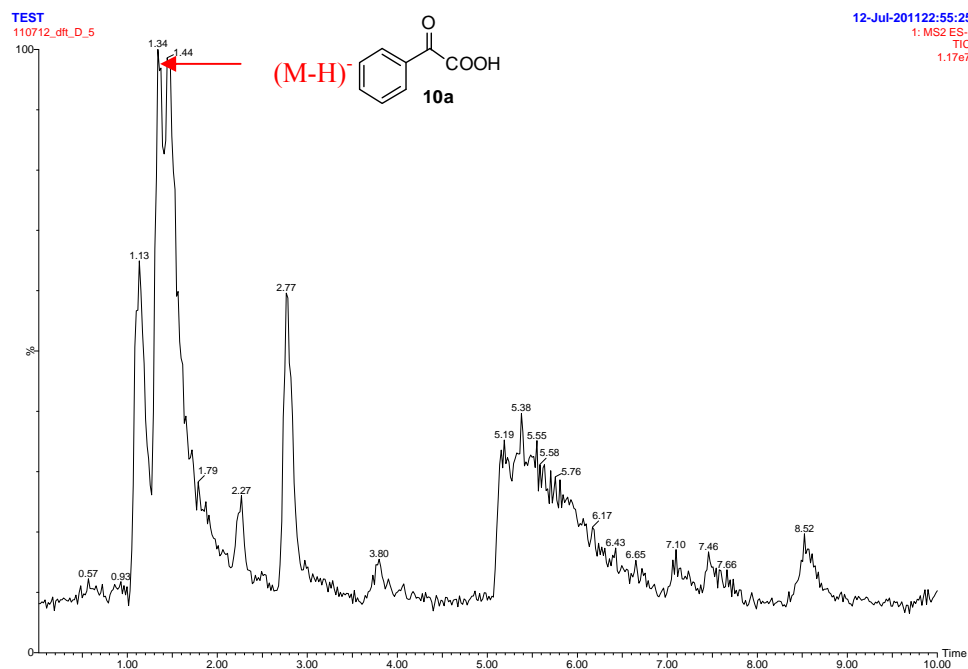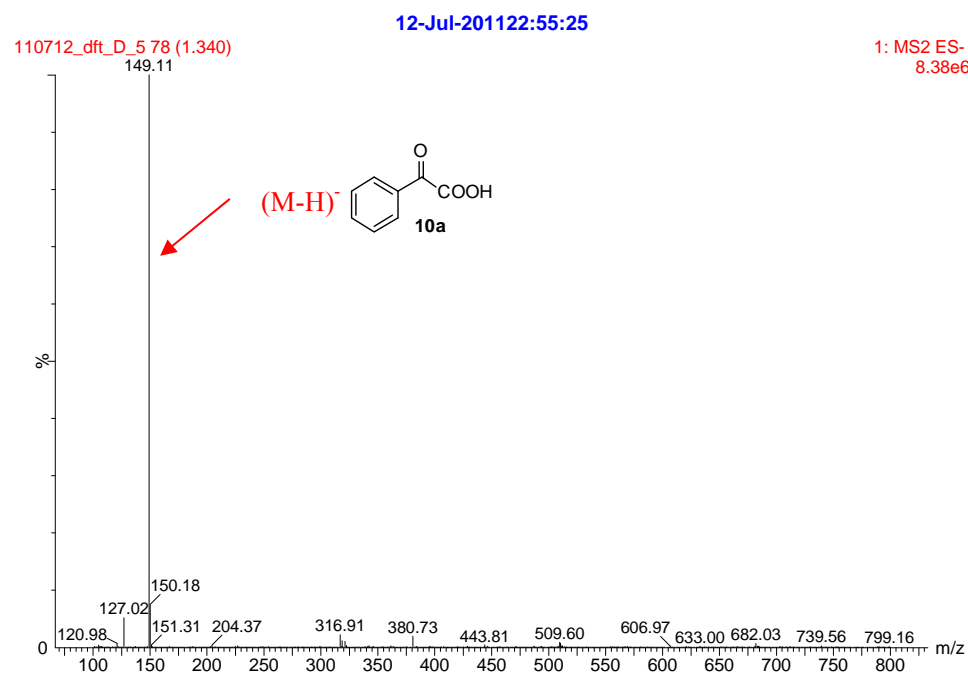



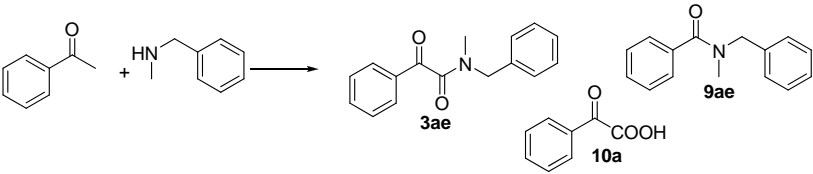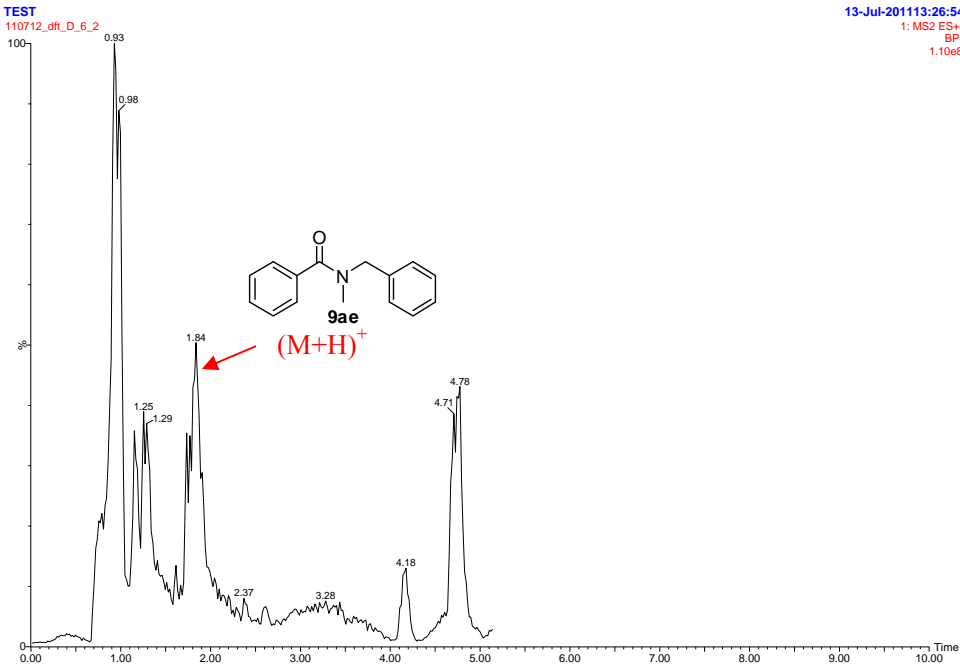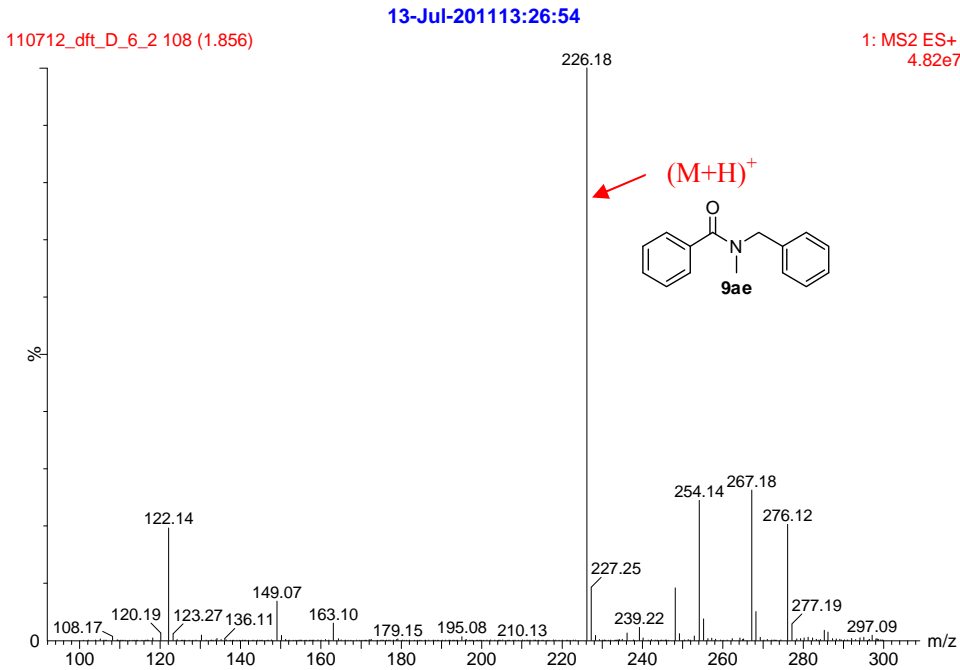

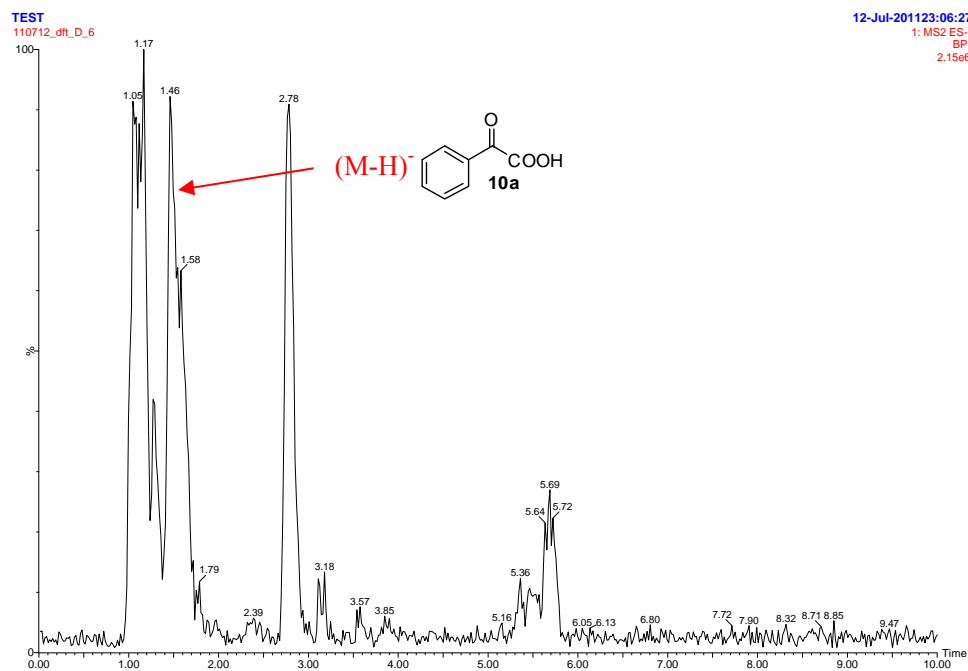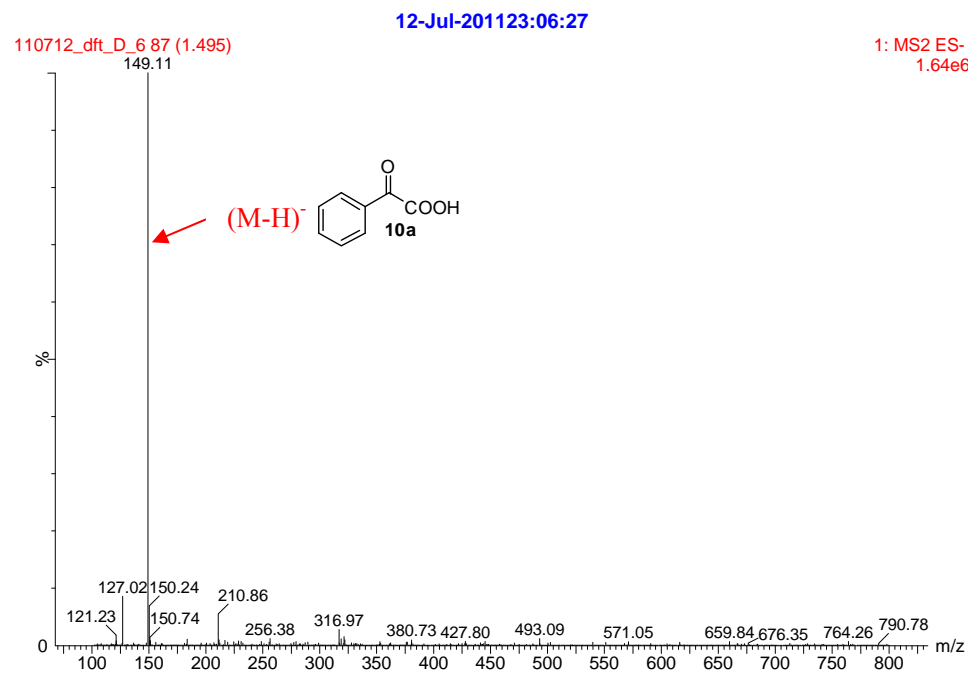

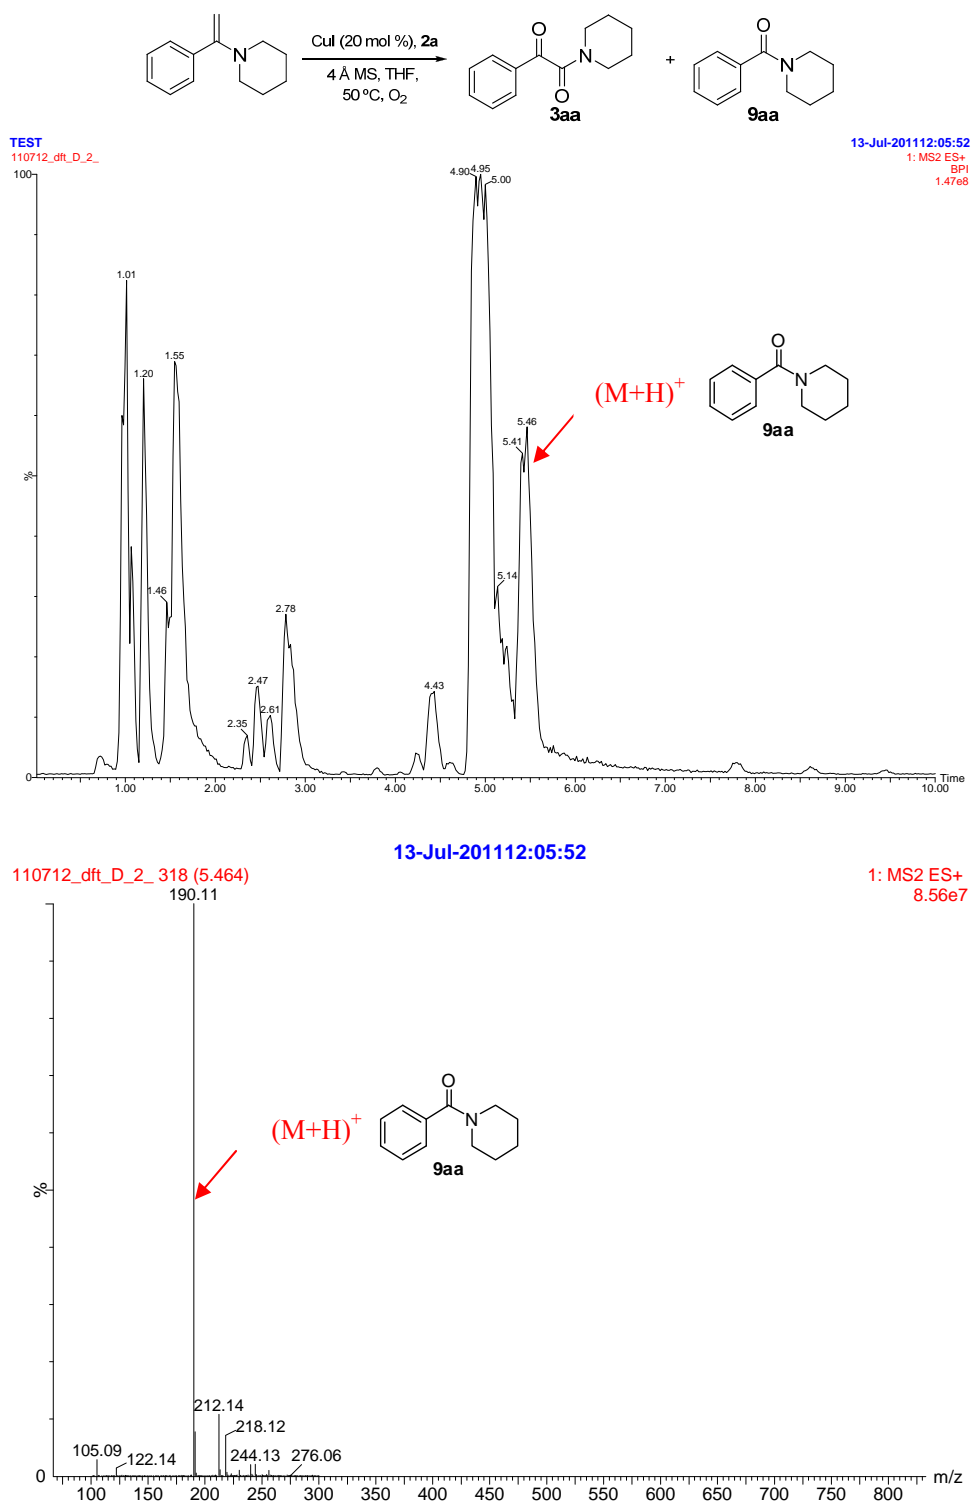

## 2.10 General procedure for the synthesis of $\alpha$ -ketoamides

Aryl methyl ketone (2 mmol) was added to a mixture of CuI (76 mg, 0.4 mmol) and amine (6 mmol) at room temperature under O<sub>2</sub> (balloon). The resulting mixture was stirred at 50 °C for 5-48 h. Then the reaction mixture was cooled to room temperature, filtered through silica gel, and washed with CH<sub>2</sub>Cl<sub>2</sub>. The resulting solution was concentrated in vacuo and the residue was purified by flash column chromatography.

### 3. Characterization data of $\alpha$ -ketoamides

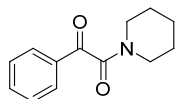

**1-phenyl-2-(piperidin-1-yl)ethane-1,2-dione (3aa).** According to the general procedure, afforded the desired product as a yellowish solid after 20 h (381 mg, 88%); eluent: hexanes/EtOAc = 5:1.  $^1\text{H}$  NMR ( $\text{CDCl}_3$ , 600 MHz, ppm):  $\delta$  = 7.97-7.95 (d,  $J$  = 7.4 Hz, 2H), 7.67-7.63 (t,  $J$  = 7.4 Hz, 1H), 7.54-7.51 (t,  $J$  = 7.7 Hz, 2H), 3.72 (brs, 2H), 3.32-3.29 (t,  $J$  = 5.6 Hz, 2H), 1.72-1.70 (m, 4H), 1.56 (brs, 2H);  $^{13}\text{C}$  NMR ( $\text{CDCl}_3$ , 150 MHz, ppm):  $\delta$  = 191.9, 165.5, 134.6, 133.3, 129.6, 129.0, 47.0, 42.2, 26.2, 25.5, 24.4; HRMS calcd for  $\text{C}_{13}\text{H}_{15}\text{NNaO}_2$  ( $\text{M} + \text{Na}$ ) $^+$  240.0995, found 240.1001.

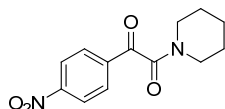

**1-(4-nitrophenyl)-2-(piperidin-1-yl)ethane-1,2-dione (3ba).** The reaction of 4-nitroacetophenone (1 mmol), piperidine (2 mmol) and CuI (5 mol %) in toluene (1 mL), afforded the product as a yellowish solid after 10 h (238 mg, 91%); eluent: hexanes/EtOAc = 5:1.  $^1\text{H}$  NMR ( $\text{CDCl}_3$ , 600 MHz, ppm):  $\delta$  = 8.36-8.34 (d,  $J$  = 8.8 Hz, 2H), 8.15-8.13 (d,  $J$  = 8.8 Hz, 2H), 3.74-3.72 (brd, 2H), 3.33-3.30 (t,  $J$  = 5.5 Hz, 2H), 1.73 (brs, 4H), 1.59 (brs, 2H);  $^{13}\text{C}$  NMR ( $\text{CDCl}_3$ , 150 MHz, ppm):  $\delta$  = 189.5, 164.1, 151.1, 137.8, 130.6, 124.1, 47.1, 42.5, 26.3, 25.4, 24.3; HRMS calcd for  $\text{C}_{13}\text{H}_{14}\text{N}_2\text{NaO}_4$  ( $\text{M} + \text{Na}$ ) $^+$  285.0846, found 285.0851.

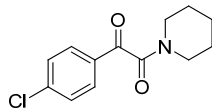

**1-(4-chlorophenyl)-2-(piperidin-1-yl)ethane-1,2-dione (3ca).** According to the general procedure, afforded the desired product as a yellow oil after 20 h (413 mg, 82%); eluent: hexanes/EtOAc = 5:1.  $^1\text{H}$  NMR ( $\text{CDCl}_3$ , 600 MHz, ppm):  $\delta$  = 7.91-7.88 (d,  $J$  = 8.5 Hz, 2H), 7.50-7.47 (d,  $J$  = 8.5 Hz, 2H), 3.71-3.69 (t,  $J$  = 5.2 Hz, 2H), 3.30-3.27 (t,  $J$  = 5.6 Hz, 2H), 1.73-1.67 (m, 4H), 1.58-1.53 (m, 2H);  $^{13}\text{C}$  NMR ( $\text{CDCl}_3$ , 150 MHz, ppm):  $\delta$  = 190.5, 164.9, 141.2, 131.7, 130.9, 129.4, 47.1, 42.3, 26.3, 25.4, 24.4; HRMS calcd for  $\text{C}_{13}\text{H}_{14}\text{ClNNaO}_2$  ( $\text{M} + \text{Na}$ ) $^+$  274.0605, found 274.0604.

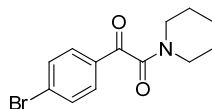

**1-(4-bromophenyl)-2-(piperidin-1-yl)ethane-1,2-dione (3da).** According to the general procedure, afforded the desired product as a yellow oil after 20 h (450 mg, 76%); eluent: hexanes/EtOAc = 5:1.  $^1\text{H}$  NMR ( $\text{CDCl}_3$ , 600 MHz, ppm):  $\delta$  = 7.83-7.80 (d,  $J$  = 8.5 Hz, 2H), 7.67-7.64 (d,  $J$  = 8.7 Hz, 2H), 3.71-3.68 (t,  $J$  = 5.2 Hz, 2H), 3.29-3.27 (t,  $J$  = 5.6 Hz, 2H), 1.72-1.66 (m, 4H), 1.57-1.53 (m, 2H);  $^{13}\text{C}$  NMR ( $\text{CDCl}_3$ , 150 MHz, ppm):  $\delta$  = 190.7, 164.9, 132.4, 132.1, 130.9, 130.1, 47.0, 42.2, 26.2, 25.4, 24.3; HRMS calcd for  $\text{C}_{13}\text{H}_{14}\text{BrNNaO}_2$  ( $\text{M} + \text{Na}$ ) $^+$  318.0100, found 318.0106.

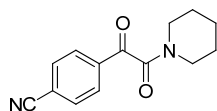

**4-(2-oxo-2-(piperidin-1-yl)acetyl)benzonitrile (3ea).** According to the general procedure, afforded the desired product as a yellowish solid after 7 h (360 mg, 74%); eluent: hexanes/EtOAc = 5:1.  $^1\text{H}$  NMR ( $\text{CDCl}_3$ , 600 MHz, ppm):  $\delta$  = 8.07-8.05 (d,  $J$  = 8.6 Hz, 2H), 7.83-7.80 (d,  $J$  = 8.6 Hz, 2H), 3.73-3.70 (t,  $J$  = 5.2 Hz, 2H), 3.32-3.29 (t,  $J$  = 5.6 Hz, 2H), 1.75-1.68 (m, 4H), 1.60-1.55 (m, 2H);  $^{13}\text{C}$  NMR ( $\text{CDCl}_3$ , 150 MHz, ppm):  $\delta$  = 189.8, 164.2, 136.3, 132.7, 129.9, 117.6, 47.1, 42.4, 26.3, 25.4, 24.3; HRMS calcd for  $\text{C}_{14}\text{H}_{14}\text{N}_2\text{NaO}_2$  ( $\text{M} + \text{Na}$ ) $^+$  265.0947, found 265.0942.

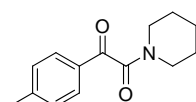

**1-(piperidin-1-yl)-2-p-tolylethane-1,2-dione (3fa).** According to the general procedure, afforded the desired product as a yellowish oil after 20 h (363 mg, 79%); eluent: hexanes/EtOAc = 5:1.  $^1\text{H}$  NMR ( $\text{CDCl}_3$ , 600 MHz, ppm):  $\delta$  = 7.85-7.83 (d,  $J$  = 8.0 Hz, 2H), 7.32-7.29 (d,  $J$  = 8.0 Hz, 2H), 3.71-3.69 (brd, 2H), 3.29-3.26 (t,  $J$  = 5.5 Hz, 2H), 2.43 (s, 3H), 1.70-1.68 (m, 4H), 1.54 (brs, 2H);  $^{13}\text{C}$  NMR ( $\text{CDCl}_3$ , 150 MHz, ppm):  $\delta$  = 191.7, 165.7, 145.8, 130.9, 129.70, 129.67, 47.0, 42.1, 26.2, 25.5, 24.4, 21.9; HRMS calcd for  $\text{C}_{14}\text{H}_{17}\text{NNaO}_2$  ( $\text{M} + \text{Na}$ ) $^+$  254.1151, found 254.1147.

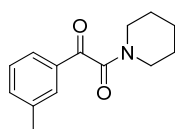

**1-(piperidin-1-yl)-2-m-tolylethane-1,2-dione (3ga).** According to the general procedure, afforded the desired product as a yellow oil after 20 h (346 mg, 75%); eluent: hexanes/EtOAc = 5:1.  $^1\text{H}$  NMR ( $\text{CDCl}_3$ , 600 MHz, ppm):  $\delta$  = 7.76-7.73 (m, 2H), 7.46-7.43 (d,  $J$  = 7.6 Hz, 1H), 7.41-7.37 (t,  $J$  = 7.6 Hz, 1H), 3.72-3.70 (brd, 2H), 3.30-3.27 (t,  $J$  = 5.6 Hz, 2H), 2.42 (s, 3H), 1.72-1.67 (m, 4H), 1.56-1.52 (m, 2H);  $^{13}\text{C}$  NMR ( $\text{CDCl}_3$ , 150 MHz, ppm):  $\delta$  = 192.2, 165.6, 138.9, 135.5, 133.3, 129.8, 128.9, 126.9, 47.0, 42.1, 26.2, 25.5, 24.4, 21.2; HRMS calcd for  $\text{C}_{14}\text{H}_{17}\text{NNaO}_2$  ( $\text{M} + \text{Na}$ ) $^+$  254.1151, found 254.1161.

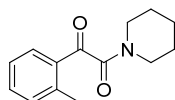

**1-(piperidin-1-yl)-2-o-tolylethane-1,2-dione (3ha).** According to the general procedure, afforded the desired product as a yellow solid after 20 h (345 mg, 75%); eluent: hexanes/EtOAc = 5:1.  $^1\text{H}$  NMR ( $\text{CDCl}_3$ , 600 MHz, ppm):  $\delta$  = 7.73-7.71 (d,  $J$  = 7.6 Hz, 1H), 7.49-7.45 (t,  $J$  = 7.5 Hz, 1H), 7.33-7.29 (m, 2H), 3.70-3.68 (t,  $J$  = 4.9 Hz, 2H), 3.32-3.29 (t,  $J$  = 5.6 Hz, 2H), 2.67 (s, 3H), 1.70-1.67 (m, 4H), 1.57-1.55 (m, 2H);  $^{13}\text{C}$  NMR ( $\text{CDCl}_3$ , 150 MHz, ppm):  $\delta$  = 193.9, 166.1, 141.4, 133.6, 132.7, 132.6, 131.7, 126.1, 47.0, 42.1, 26.1, 25.4, 24.4, 21.8; HRMS calcd for  $\text{C}_{14}\text{H}_{17}\text{NNaO}_2$  ( $\text{M} + \text{Na}$ ) $^+$  254.1151, found 254.1160.

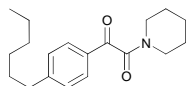

**1-(4-hexylphenyl)-2-(piperidin-1-yl)ethane-1,2-dione (3ia).** According to the general procedure, afforded the desired product as a light yellow oil after 20 h (368 mg, 64%); eluent: hexanes/EtOAc = 7:1.  $^1\text{H}$  NMR (600 MHz,  $\text{CDCl}_3$ )  $\delta$  = 7.85-7.84 (d,  $J$  = 8.1 Hz, 2H), 7.30-7.29 (d,  $J$  = 8.1 Hz, 2H), 3.70 (brs, 2H), 3.29-3.27 (t,  $J$  = 5.6 Hz, 2H), 2.68-2.65 (t,  $J$  = 7.7 Hz, 2H), 1.69-1.68 (m, 4H), 1.63-1.61 (m, 2H), 1.54 (brs, 2H), 1.32-1.29 (m, 6H), 0.88-0.86 (t,  $J$  = 6.7 Hz, 3H);  $^{13}\text{C}$  NMR (150 MHz,  $\text{CDCl}_3$ )  $\delta$  = 191.7, 165.7, 150.8, 131.1, 129.7, 129.1, 47.1, 42.1, 36.2, 31.6, 31.0, 28.9, 26.2, 25.5, 24.4, 22.5, 14.0; HRMS calcd for  $\text{C}_{19}\text{H}_{27}\text{NNaO}_2$  ( $\text{M} + \text{Na}$ ) $^+$  324.1939, found 324.1936.

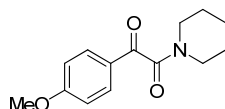

**1-(4-methoxyphenyl)-2-(piperidin-1-yl)ethane-1,2-dione (3ja).** According to the general procedure, afforded the desired product as a yellow oil after 48 h (302 mg, 61%); eluent: hexanes/EtOAc = 5:1.  $^1\text{H}$  NMR ( $\text{CDCl}_3$ , 600 MHz, ppm):  $\delta$  = 7.93-7.91 (d,  $J$  = 8.8 Hz, 2H), 6.99-6.96 (d,  $J$  = 8.8 Hz, 2H), 3.89 (s, 3H), 3.71-3.69 (brd, 2H), 3.30-3.27 (t,  $J$  = 5.6 Hz, 2H), 1.70-1.68 (m, 4H), 1.54 (brs, 2H);  $^{13}\text{C}$  NMR ( $\text{CDCl}_3$ , 150 MHz, ppm):  $\delta$  = 190.7, 165.8, 164.8, 131.9, 126.4, 114.3, 55.6, 47.0, 42.0, 26.2, 25.4, 24.4; HRMS calcd for  $\text{C}_{14}\text{H}_{17}\text{NNaO}_3$  ( $\text{M} + \text{Na}$ ) $^+$  270.1101, found 270.1098.

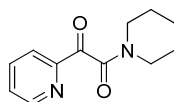

**1-(piperidin-1-yl)-2-(pyridin-2-yl)ethane-1,2-dione (3ka).** According to the general procedure, afforded the desired product as a yellow oil after 7 h (262 mg, 60%); eluent: hexanes/EtOAc = 2:1.  $^1\text{H}$  NMR ( $\text{CDCl}_3$ , 600 MHz, ppm):  $\delta$  = 8.76-8.74 (d,  $J$  = 4.6 Hz, 1H), 8.12-8.10 (d,  $J$  = 7.7 Hz, 1H), 7.91-7.88 (t,  $J$  = 7.6 Hz, 1H), 7.53-7.50 (m, 1H), 3.72 (brs, 2H), 3.29-3.26 (t,  $J$  = 5.5 Hz, 2H), 1.72-1.70 (m, 4H), 1.59 (brs, 2H);  $^{13}\text{C}$  NMR ( $\text{CDCl}_3$ , 150 MHz, ppm):  $\delta$  = 192.1, 166.2, 151.5, 149.9, 137.1, 127.9, 123.1, 47.0, 42.1, 25.9, 25.2, 24.5; HRMS calcd for  $\text{C}_{12}\text{H}_{14}\text{N}_2\text{NaO}_2$  ( $\text{M} + \text{Na}$ ) $^+$  241.0947, found 241.0962.

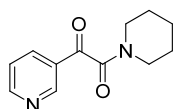

**1-(piperidin-1-yl)-2-(pyridin-3-yl)ethane-1,2-dione (3la).** According to the general procedure, afforded the desired product as a light yellow oil after 5 h (306 mg, 70%); eluent: hexanes/EtOAc = 5:1.  $^1\text{H}$  NMR (600 MHz,  $\text{CDCl}_3$ )  $\delta$  = 9.11-9.10 (d,  $J$  = 1.4 Hz, 1H), 8.82-8.81 (dd,  $J$  = 4.8, 1.4 Hz, 1H), 8.23-8.22 (d,  $J$  = 7.9 Hz, 1H), 7.45-7.43 (dd,  $J$  = 7.8, 4.9 Hz, 1H), 3.70-3.68 (t,  $J$  = 5.0 Hz, 2H), 3.31-3.29 (t,  $J$  = 5.6 Hz, 2H), 1.69 (m, 4H), 1.56 (m, 2H);  $^{13}\text{C}$  NMR (150 MHz,  $\text{CDCl}_3$ )  $\delta$  = 190.3, 164.3, 154.7, 151.2, 136.6, 129.0, 123.9, 47.1, 42.4, 26.3, 25.4, 24.3. HRMS calcd for  $\text{C}_{12}\text{H}_{14}\text{N}_2\text{NaO}_2$  ( $\text{M} + \text{Na}$ ) $^+$  241.0953, found 241.0956.

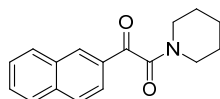

**1-(naphthalen-2-yl)-2-(piperidin-1-yl)ethane-1,2-dione (3ma).** According to the general procedure, afforded the desired product as a yellow oil after 30 h (428 mg, 80%); eluent: hexanes/EtOAc = 5:1.  $^1\text{H}$  NMR ( $\text{CDCl}_3$ , 600 MHz, ppm):  $\delta$  = 8.45 (s, 1H), 8.04-8.01 (dd,  $J$  = 8.6, 1.5 Hz, 1H), 7.99-7.96 (d,  $J$  = 8.3 Hz, 1H), 7.95-7.93 (d,  $J$  = 8.5 Hz, 1H), 7.91-7.88 (d,  $J$  = 8.0 Hz, 1H), 7.66-7.62 (t,  $J$  = 7.6 Hz, 1H), 7.59-7.56 (t,  $J$  = 7.5 Hz, 1H), 3.78-3.75 (t,  $J$  = 5.1 Hz, 2H), 3.34-3.32 (t,  $J$  = 5.5 Hz, 2H), 1.73 (brs, 4H), 1.58-1.53 (m, 2H);  $^{13}\text{C}$  NMR ( $\text{CDCl}_3$ , 150 MHz, ppm):  $\delta$  = 192.1, 165.6, 136.3, 132.8, 132.5, 130.7, 129.9, 129.3, 129.1, 127.9, 127.1, 123.7, 47.1, 42.3, 26.2, 25.5, 24.4; HRMS calcd for  $\text{C}_{17}\text{H}_{17}\text{NNaO}_2$  ( $\text{M} + \text{Na}$ ) $^+$  290.1151, found 290.1138.

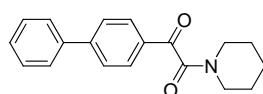

**1-(biphenyl-4-yl)-2-(piperidin-1-yl)ethane-1,2-dione (3na).** According to the general procedure, afforded the desired product as a yellow oil after 20 h (276 mg, 47%); eluent: hexanes/EtOAc = 7:1.  $^1\text{H}$  NMR (600 MHz,  $\text{CDCl}_3$ )  $\delta$  = 7.99-7.98 (d,  $J$  = 8.3 Hz, 2H), 7.69-7.68 (d,  $J$  = 8.3 Hz, 2H), 7.58-7.57 (d,  $J$  = 7.4 Hz, 2H), 7.43-7.41 (t,  $J$  = 7.6 Hz, 2H), 7.37-7.34 (t,  $J$  = 7.2 Hz, 1H), 3.68 (brs, 2H), 3.28-3.26 (t,  $J$  = 5.5 Hz, 2H), 1.66 (brs, 4H), 1.52 (brs, 2H);  $^{13}\text{C}$  NMR (150 MHz,  $\text{CDCl}_3$ )  $\delta$  = 191.6, 165.5, 147.3, 139.5, 132.0, 130.1, 129.0, 128.6, 127.6, 127.3, 47.0, 42.1, 26.2, 25.5, 24.4. HRMS calcd for  $\text{C}_{19}\text{H}_{19}\text{NNaO}_2$  ( $\text{M} + \text{Na}$ ) $^+$  316.1313, found 316.1313.

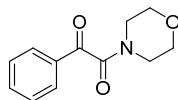

**1-morpholino-2-phenylethane-1,2-dione (3ab).** According to the general procedure, afforded the desired product as a yellow oil after 20 h (305 mg, 70%); eluent: hexanes/EtOAc = 5:1.  $^1\text{H}$  NMR ( $\text{CDCl}_3$ , 600 MHz, ppm):  $\delta$  = 7.98-7.95 (d,  $J$  = 7.8 Hz, 2H), 7.68-7.64 (t,  $J$  = 7.5 Hz, 1H), 7.54-7.51 (t,  $J$  = 7.8 Hz, 2H), 3.82-3.78 (m, 4H), 3.67-3.65 (t,  $J$  = 4.8 Hz, 2H), 3.40-3.37 (t,  $J$  = 4.8 Hz, 2H);  $^{13}\text{C}$  NMR ( $\text{CDCl}_3$ , 150 MHz, ppm):  $\delta$  = 191.1, 165.5, 134.9, 133.1, 129.7, 129.1, 66.8, 66.7, 46.3, 41.6; HRMS calcd for  $\text{C}_{12}\text{H}_{13}\text{NNaO}_3$  ( $\text{M} + \text{Na}$ ) $^+$  242.0788, found 242.0785.

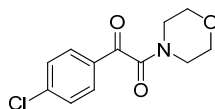

**1-(4-chlorophenyl)-2-morpholinoethane-1,2-dione (3cb).** According to the general procedure, afforded the desired product as a yellow solid after 20 h (314 mg, 62%); eluent: hexanes/EtOAc = 5:1.  $^1\text{H}$  NMR ( $\text{CDCl}_3$ , 600 MHz, ppm):  $\delta$  = 7.89-7.87 (d,  $J$  = 8.5 Hz, 2H), 7.48-7.46 (d,  $J$  = 8.5 Hz, 2H), 3.78-3.74 (m, 4H), 3.64-3.62 (t,  $J$  = 4.8 Hz, 2H), 3.37-3.34 (t,  $J$  = 4.7 Hz, 2H);  $^{13}\text{C}$  NMR ( $\text{CDCl}_3$ , 150 MHz, ppm):  $\delta$  = 189.7, 164.9, 141.6, 131.5, 131.0, 129.5, 66.7, 66.6, 46.3, 41.7; HRMS calcd for  $\text{C}_{12}\text{H}_{12}\text{ClNNaO}_3$  ( $\text{M} + \text{Na}$ ) $^+$  276.0403, found 276.0397.

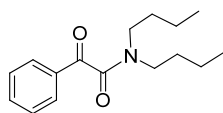

***N,N*-dibutyl-2-oxo-2-phenylacetamide (3ac).** According to the general procedure, afforded the desired product as a yellow oil after 20 h (279 mg, 53%); eluent: hexanes/EtOAc = 15:1.  $^1\text{H}$  NMR ( $\text{CDCl}_3$ , 600 MHz, ppm):  $\delta$  = 7.95-7.92 (d,  $J$  = 7.3 Hz, 2H), 7.64-7.61 (t,  $J$  = 7.5 Hz, 1H), 7.52-7.48 (t,  $J$  = 7.7 Hz, 2H), 3.52-3.48 (t,  $J$  = 7.7 Hz, 2H), 3.17-3.13 (t,  $J$  = 7.7 Hz, 2H), 1.70-1.64 (m, 2H), 1.57-1.51 (m, 2H), 1.46-1.38 (m, 2H), 1.22-1.15 (m, 2H), 1.01-0.98 (t,  $J$  = 7.4 Hz, 3H), 0.83-0.80 (t,  $J$  = 7.4 Hz, 3H);  $^{13}\text{C}$  NMR ( $\text{CDCl}_3$ , 150 MHz, ppm):  $\delta$  = 191.6, 167.1, 134.4, 133.4, 129.6, 128.9, 47.4, 44.0, 30.6, 29.5, 20.2, 19.8, 13.8, 13.5; HRMS calcd for  $\text{C}_{16}\text{H}_{23}\text{NNaO}_2$  ( $\text{M} + \text{Na}$ ) $^+$  284.1621, found 284.1618.

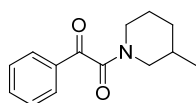

**1-(3-methylpiperidin-1-yl)-2-phenylethane-1,2-dione (3ad).** According to the general procedure, afforded the desired product (a mixture of s-cis and s-trans isomers) as a yellow oil after 20 h (400 mg, 87%); eluent: hexanes/EtOAc = 15:1.  $^1\text{H}$  NMR ( $\text{CDCl}_3$ , 600 MHz, ppm):  $\delta$  = 7.96-7.94 (d,  $J$  = 8.3 Hz, 4H), 7.65-7.62 (td,  $J$  = 7.4, 1.2 Hz, 2H), 7.52-7.49 (t,  $J$  = 7.5 Hz, 4H), 4.53-4.46 (m, 2H), 3.49-3.40 (m, 2H), 3.04-2.99 (m, 1H), 2.85-2.79 (td,  $J$  = 12.5, 3.1 Hz, 1H), 2.72-2.67 (m, 1H), 2.53-2.48 (m, 1H), 1.89-1.47 (m, 8H), 1.24-1.18 (m, 2H), 1.00-0.98 (d,  $J$  = 6.6 Hz, 3H), 0.82-0.80 (d,  $J$  = 6.8 Hz, 3H);  $^{13}\text{C}$  NMR ( $\text{CDCl}_3$ , 150 MHz, ppm):  $\delta$  = 191.9, 191.8, 165.4, 134.6, 133.34, 133.31, 129.57, 129.55, 129.0, 53.3, 48.4, 46.5, 41.6, 32.91, 32.85, 31.6, 31.1, 25.6, 24.7, 18.9, 18.7; HRMS calcd. for  $\text{C}_{14}\text{H}_{17}\text{NNaO}_2$  ( $\text{M} + \text{Na}$ ) $^+$ , 254.1151; found, 254.1161.

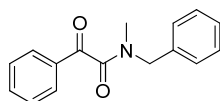

***N*-benzyl-*N*-methyl-2-oxo-2-phenylacetamide (3ae).** According to the general procedure, afforded the desired product (a mixture of s-cis and s-trans isomers) as a yellow oil after 30 h (373 mg, 74%); eluent: hexanes/EtOAc = 8:1.  $^1\text{H}$  NMR ( $\text{CDCl}_3$ , 600 MHz, ppm):  $\delta$  = 8.01-7.96 (m, 4H), 7.66-7.63 (t,  $J$  = 7.5 Hz, 2H), 7.53-7.50 (t,  $J$  = 7.8 Hz, 4H), 7.41-7.24 (m, 10H), 4.74 (s, 2H), 4.40 (s, 2H), 3.00 (s, 3H), 2.85 (s, 3H);  $^{13}\text{C}$  NMR ( $\text{CDCl}_3$ , 150 MHz, ppm):  $\delta$  = 191.5, 167.3, 167.2, 135.8, 135.0, 134.7, 133.3, 133.1, 129.8, 129.7, 129.1, 129.0, 128.9, 128.8, 128.3, 128.2, 127.9, 127.8, 53.6, 49.9, 34.5, 31.4; HRMS calcd for  $\text{C}_{16}\text{H}_{15}\text{NNaO}_2$  ( $\text{M} + \text{Na}$ ) $^+$  276.0995, found 276.0999.

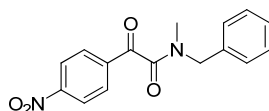

***N*-benzyl-*N*-methyl-2-(4-nitrophenyl)-2-oxoacetamide (3be).** The reaction of 4-nitroacetophenone (1 mmol), *N*-benzylmethylamine (2 mmol) and CuI (5 mol %) in toluene (1 mL), afforded the product as a yellowish oil after 20 h (245 mg, 82%); eluent: hexanes/EtOAc = 10:1.  $^1\text{H}$  NMR ( $\text{CDCl}_3$ , 600 MHz, ppm):  $\delta$  = 8.36-8.31 (m, 4H), 8.17-8.13 (m, 4H), 7.42-7.22 (m, 10H), 4.75 (s, 2H), 4.45 (s, 2H), 3.06 (s, 3H), 2.89 (s, 3H);  $^{13}\text{C}$  NMR ( $\text{CDCl}_3$ , 150 MHz, ppm):  $\delta$  = 189.1, 166.1, 165.8, 151.13, 151.05, 137.7, 137.6, 135.4, 134.7, 130.9, 130.8, 129.01, 128.96,



128.4, 128.3, 128.2, 127.7, 124.2, 124.0, 53.6, 50.2, 34.5, 32.1; HRMS calcd for  $C_{16}H_{14}N_2NaO_4$  ( $M + Na$ )<sup>+</sup> 321.0851, found 321.0843.

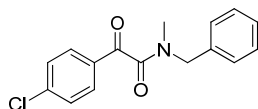

**N-benzyl-2-(4-chlorophenyl)-N-methyl-2-oxoacetamide (3ce).** According to the general procedure, afforded the desired product (a mixture of s-cis and s-trans isomers) as a yellowish oil after 20 h (436 mg, 76%); eluent: hexanes/EtOAc = 10:1. <sup>1</sup>H NMR (CDCl<sub>3</sub>, 600 MHz, ppm): δ = 7.94-7.89 (m, 4H), 7.49-7.46 (m, 4H), 7.40-7.18 (m, 10H), 4.72 (s, 2H), 4.39 (s, 2H), 2.99 (s, 3H), 2.84 (s, 3H); <sup>13</sup>C NMR (CDCl<sub>3</sub>, 150 MHz, ppm): δ = 190.1, 166.8, 166.6, 141.4, 135.7, 134.9, 131.7, 131.6, 131.1, 131.0, 129.5, 129.4, 128.93, 128.89, 128.3, 128.2, 128.0, 127.8, 127.0, 53.5, 50.0, 34.5, 31.6; HRMS calcd for  $C_{16}H_{14}ClNNaO_2$  ( $M + Na$ )<sup>+</sup> 310.0611, found 310.0599.

#### 4. References

1. W. Caseri, T. Sauer and G. Wegner, *Makromol. Chem., Rapid Commun.*, 1988, **9**, 651-657.
2. J. Paleček and O. Paleta, *Synthesis*, 2004, 521-524.
3. W. L. Mo, H. Xiong, J. L. Hua, Y. M. Ni and G. X. Li, *Appl. Organometal. Chem.* 2010, **24**, 576-580.
4. (a) K. Kaneda, T. Itoh, N. Kii, K. Jitsukawa and S. Teranishi, *J. Mol. Catal.*, 1982, **15**, 349-365; (b) M. Tokunaga, Y. Shirogane, H. Aoyama, Y. Obora and Y. Tsuji, *J. Organomet. Chem.*, 2005, **690**, 5378-5382.

## 5. Copies of $^1\text{H}$ NMR and $^{13}\text{C}$ NMR spectra for all compounds

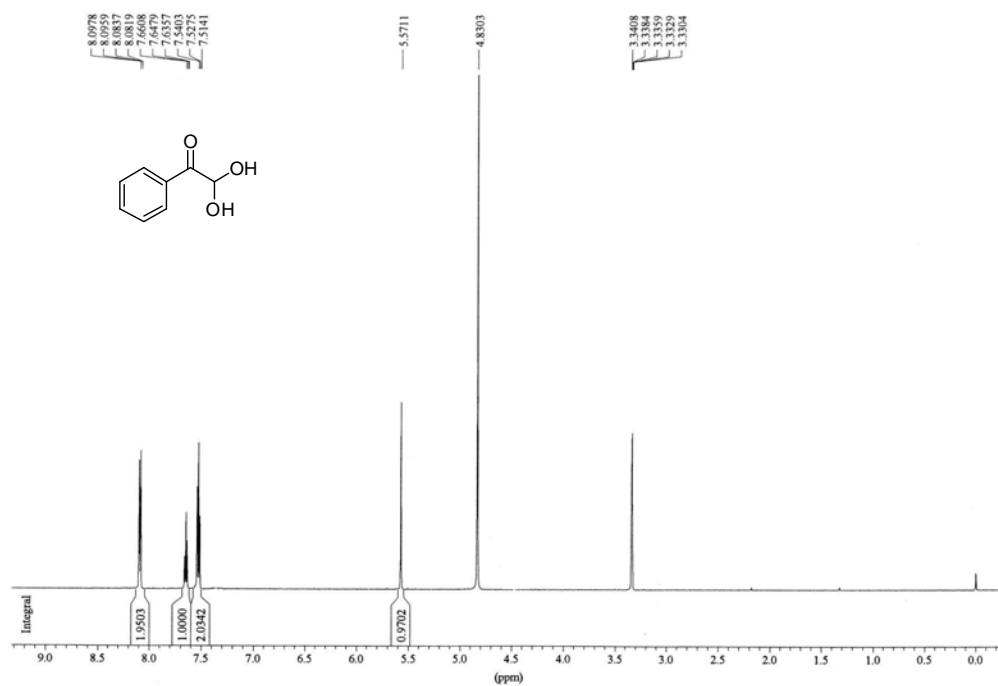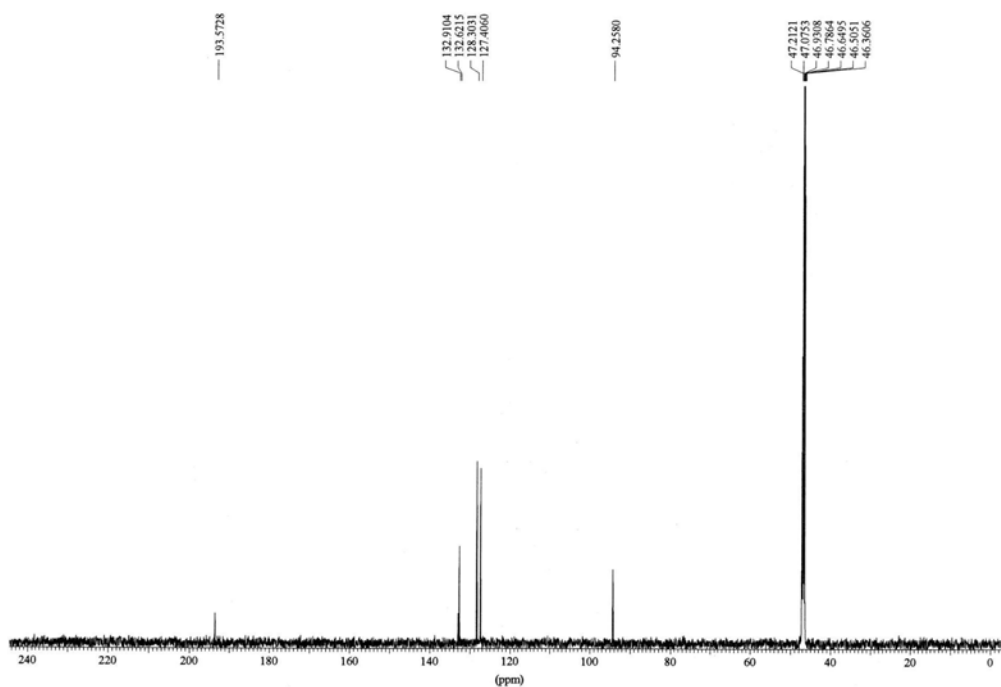

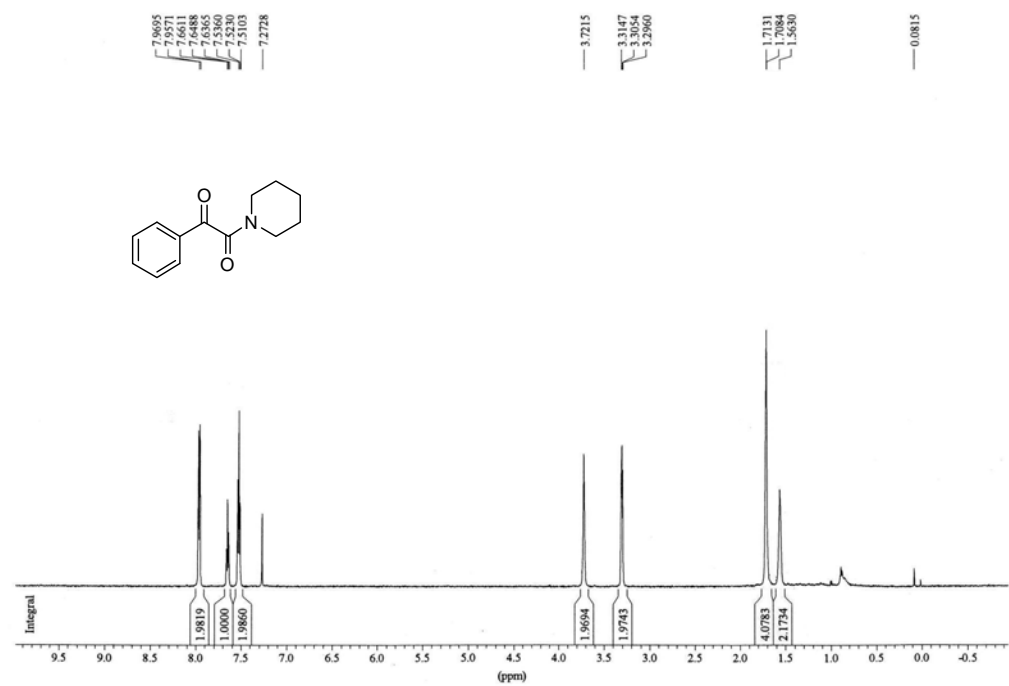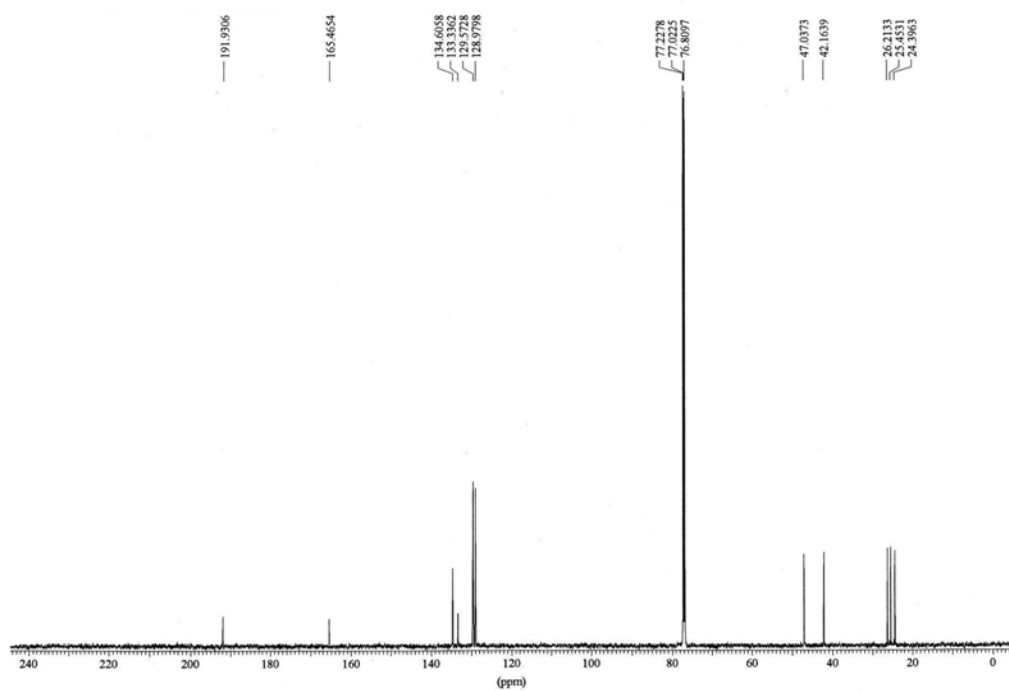

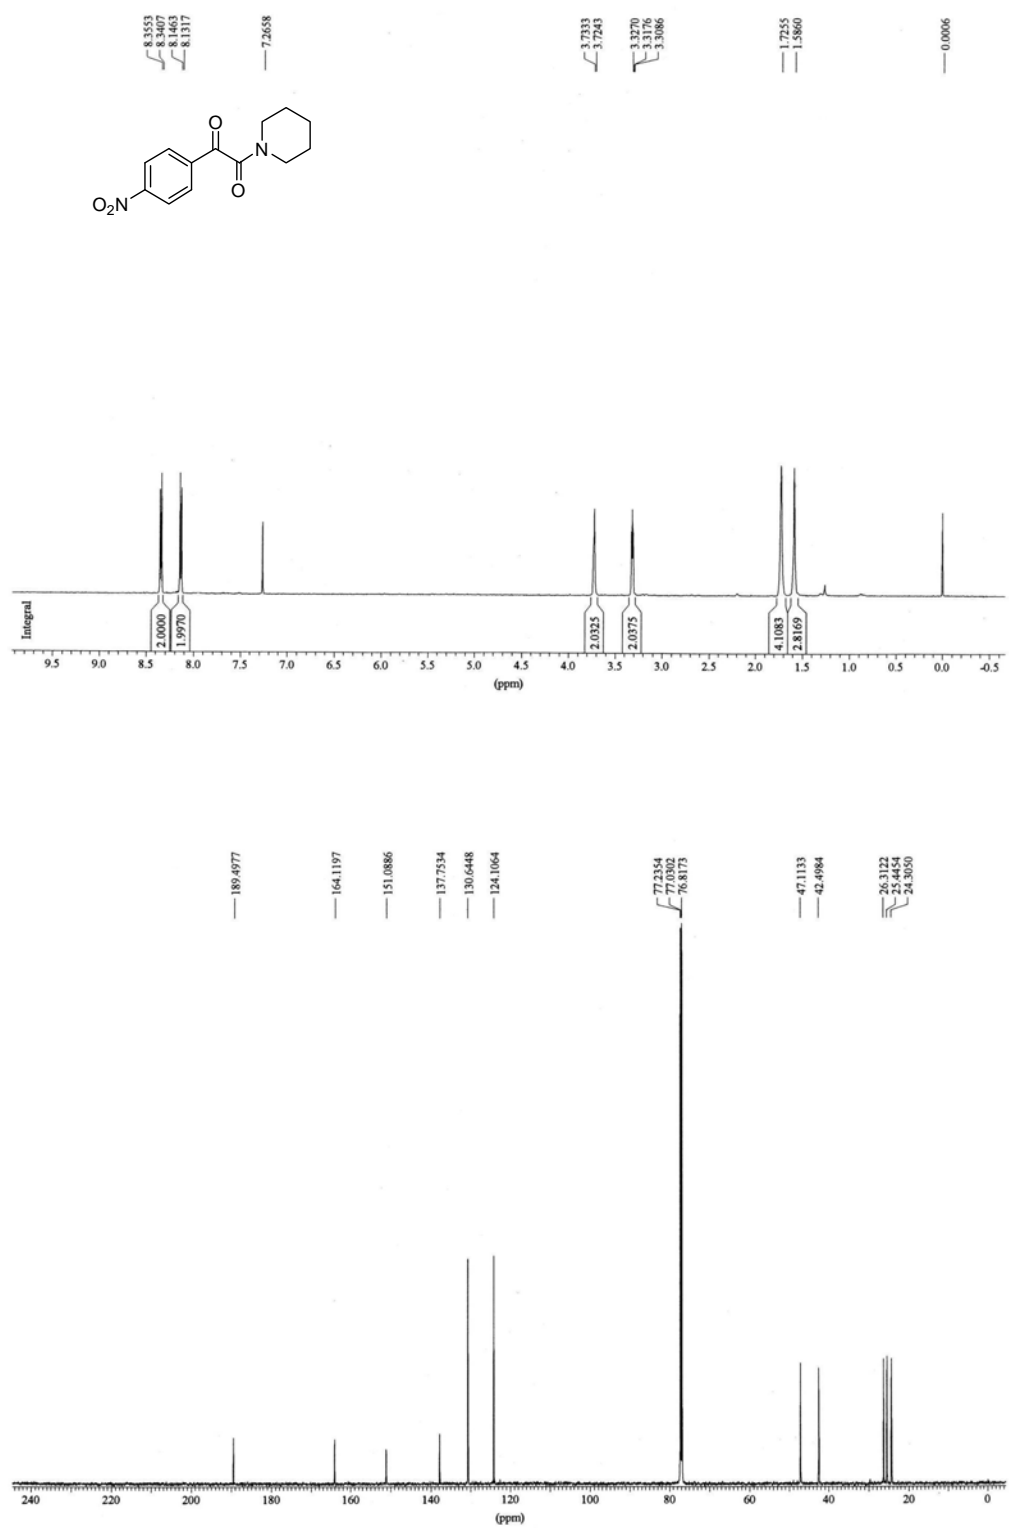

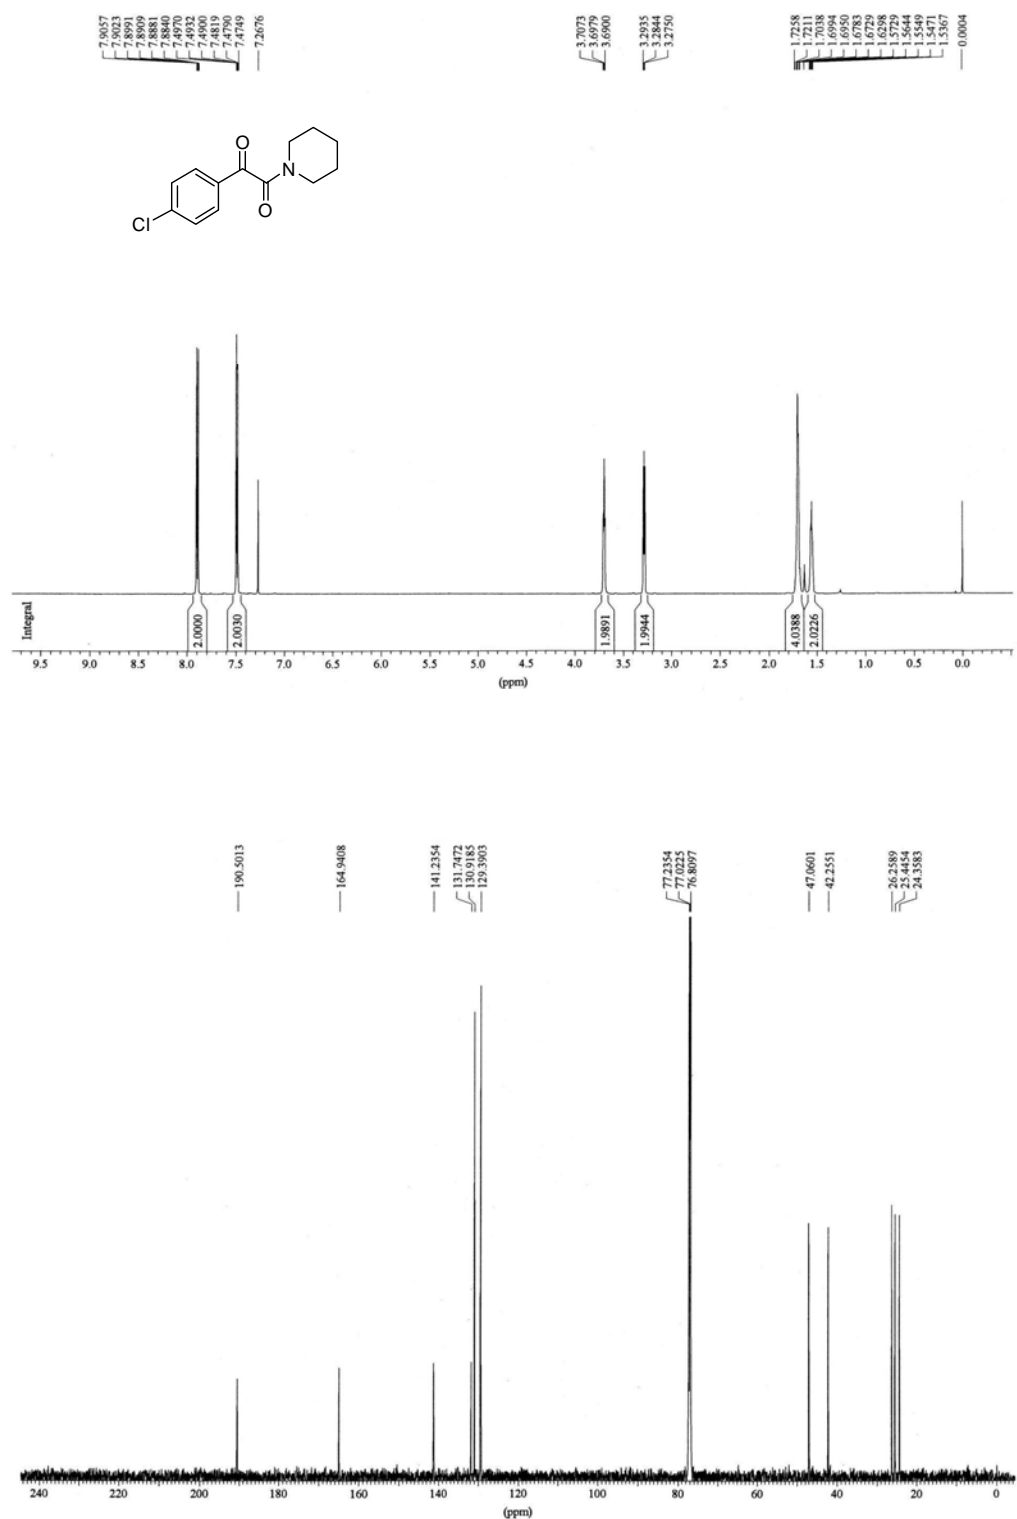

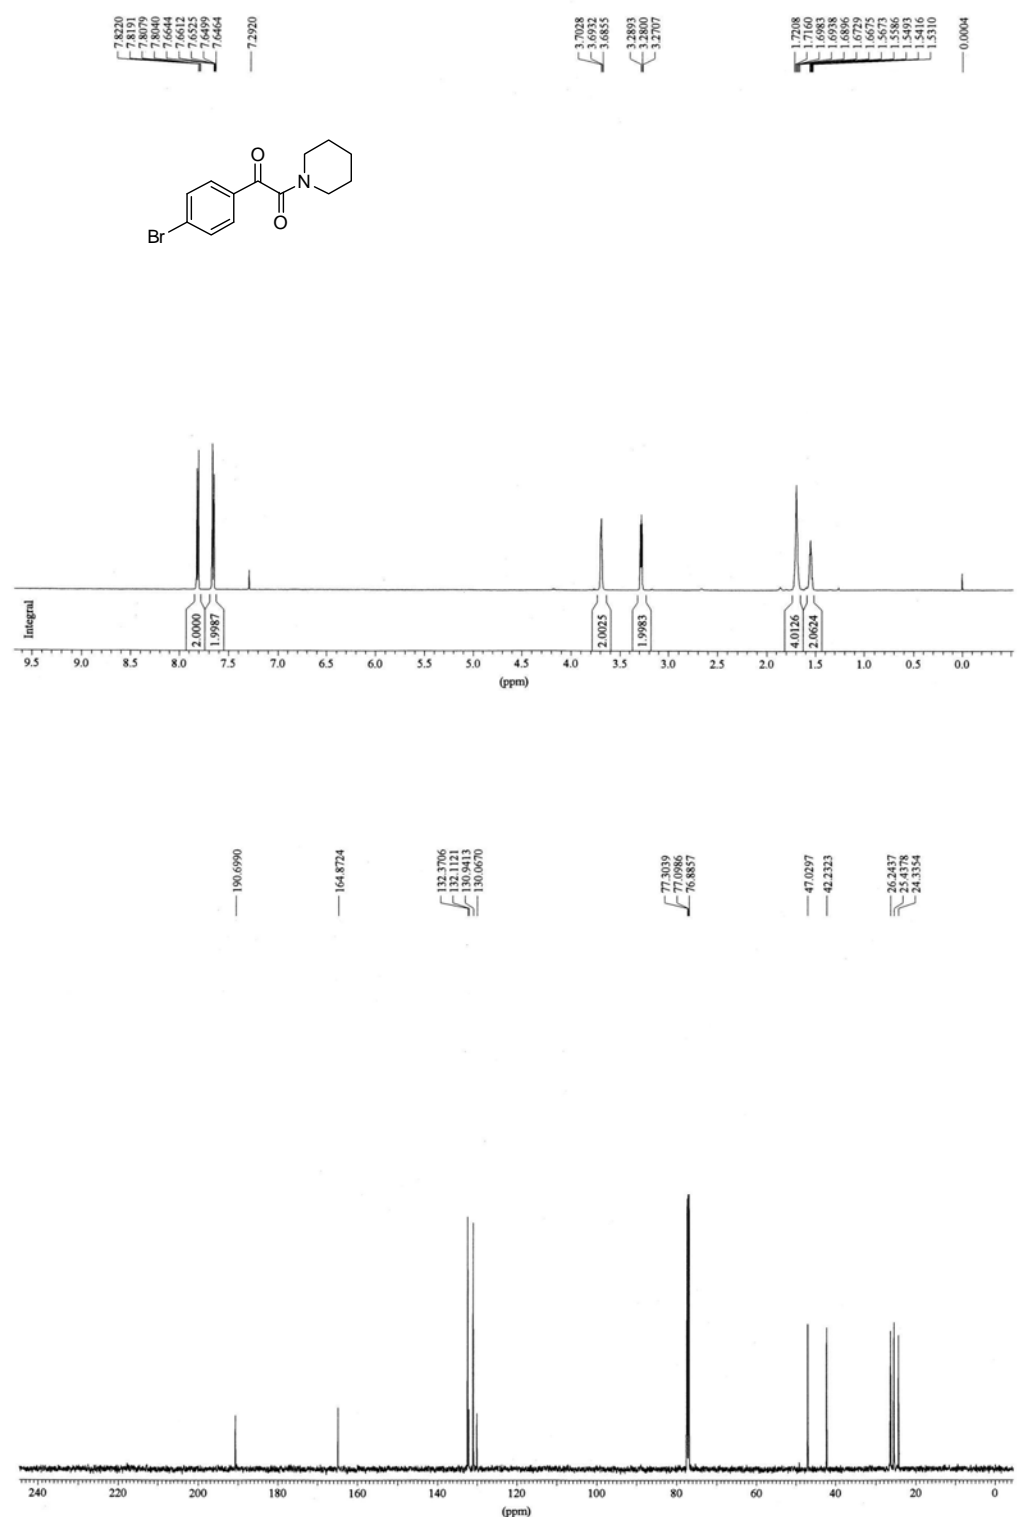

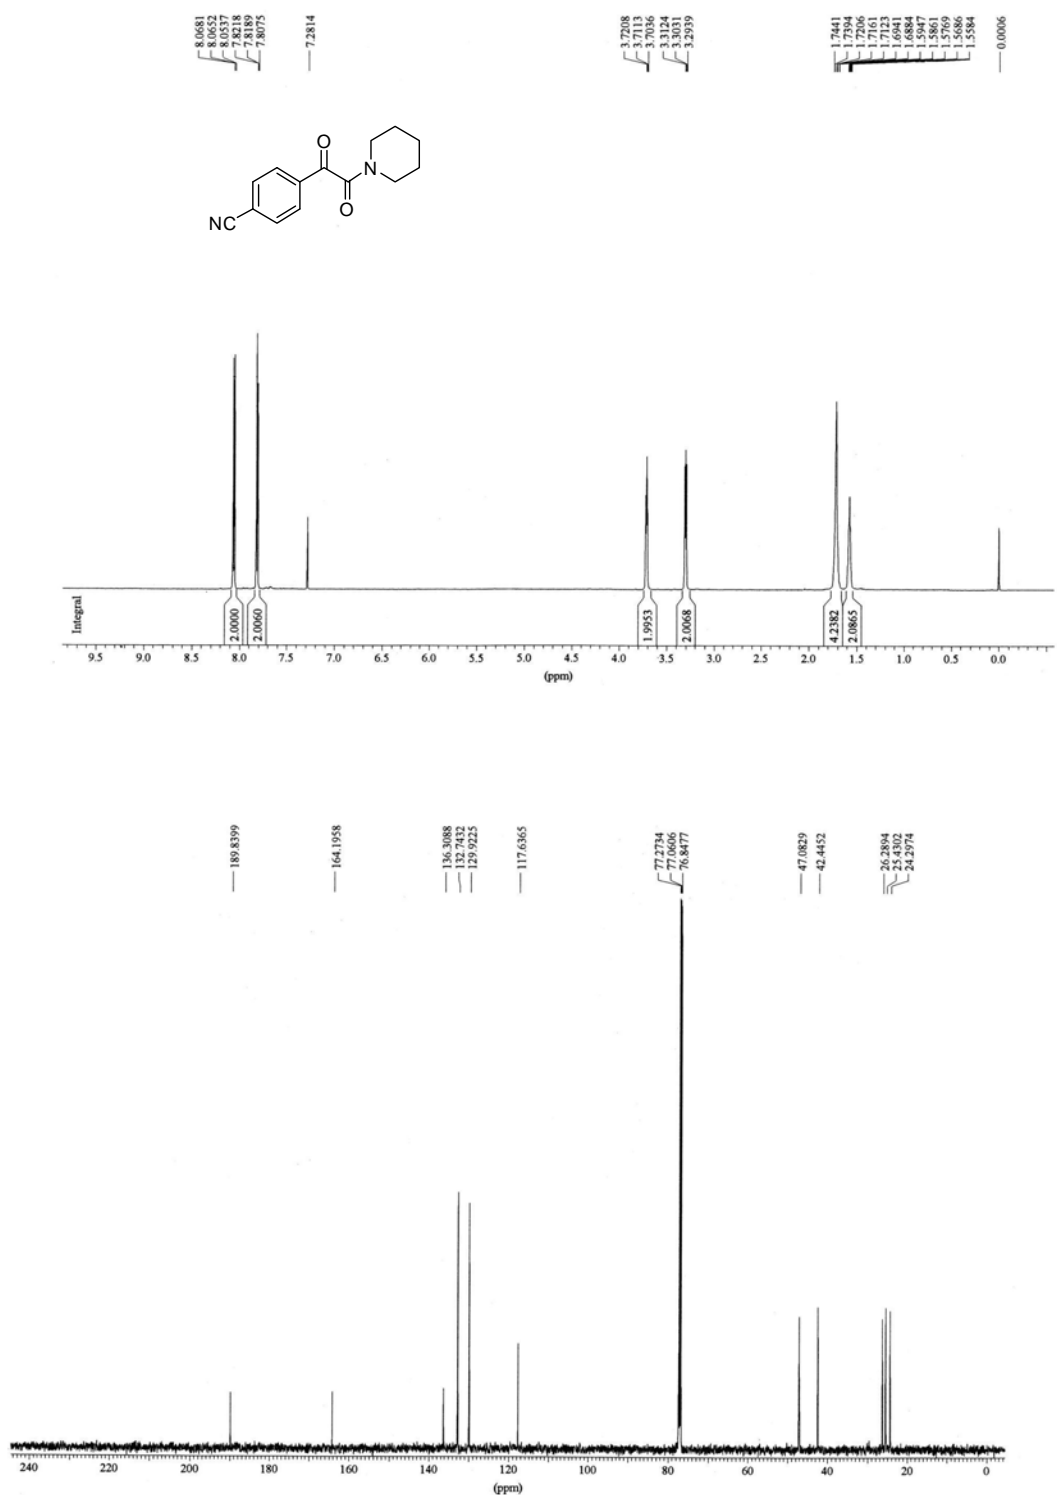

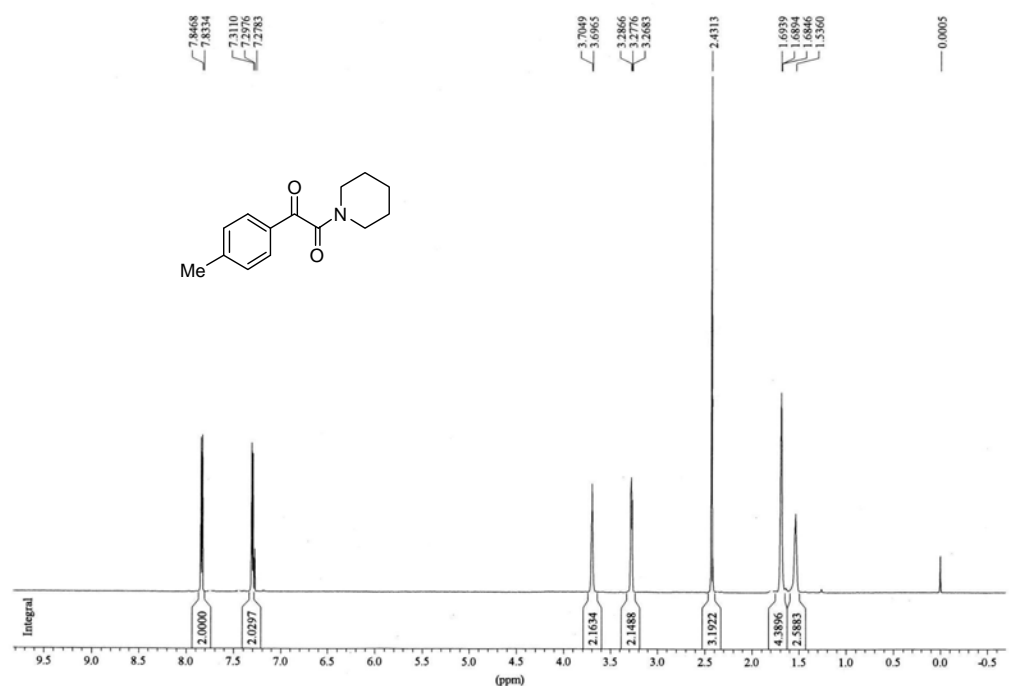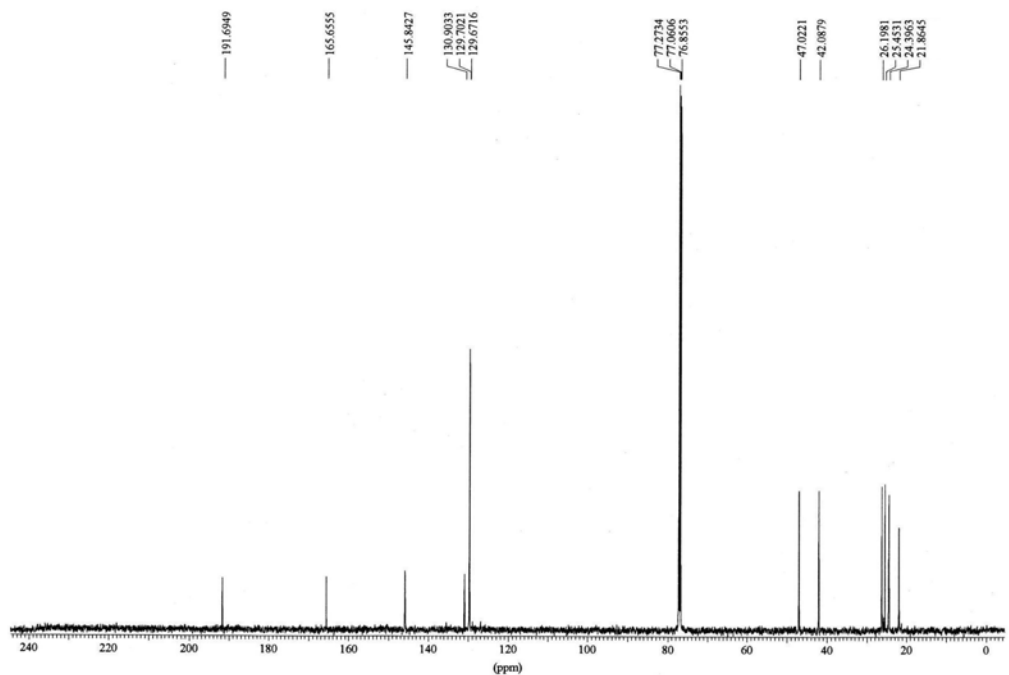



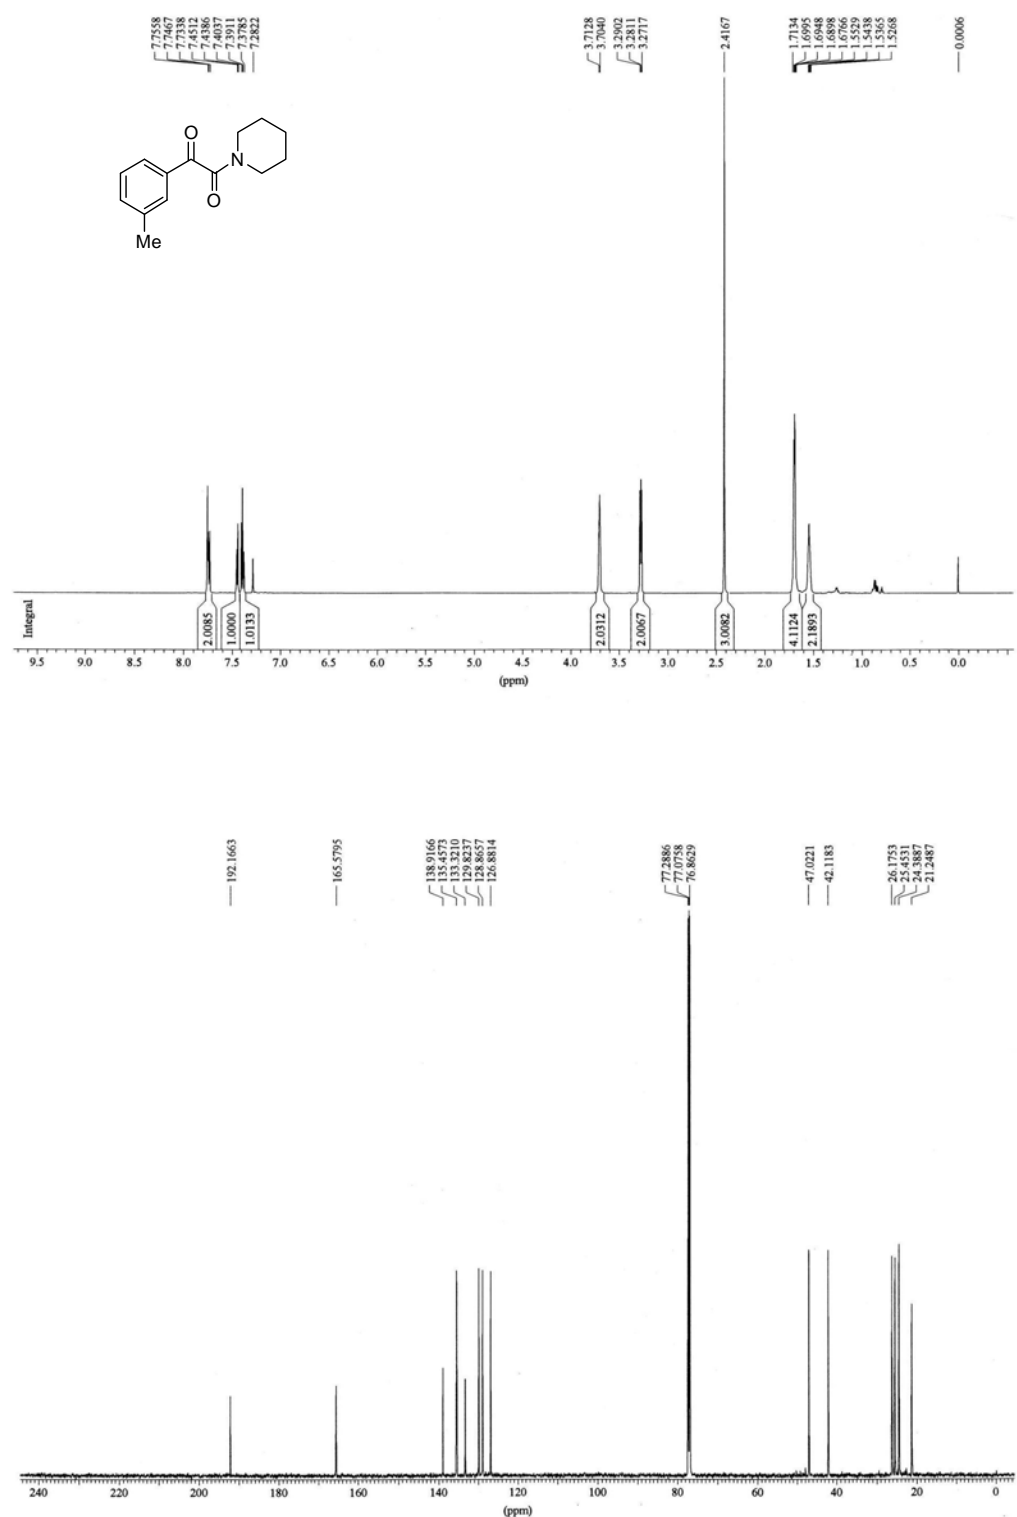

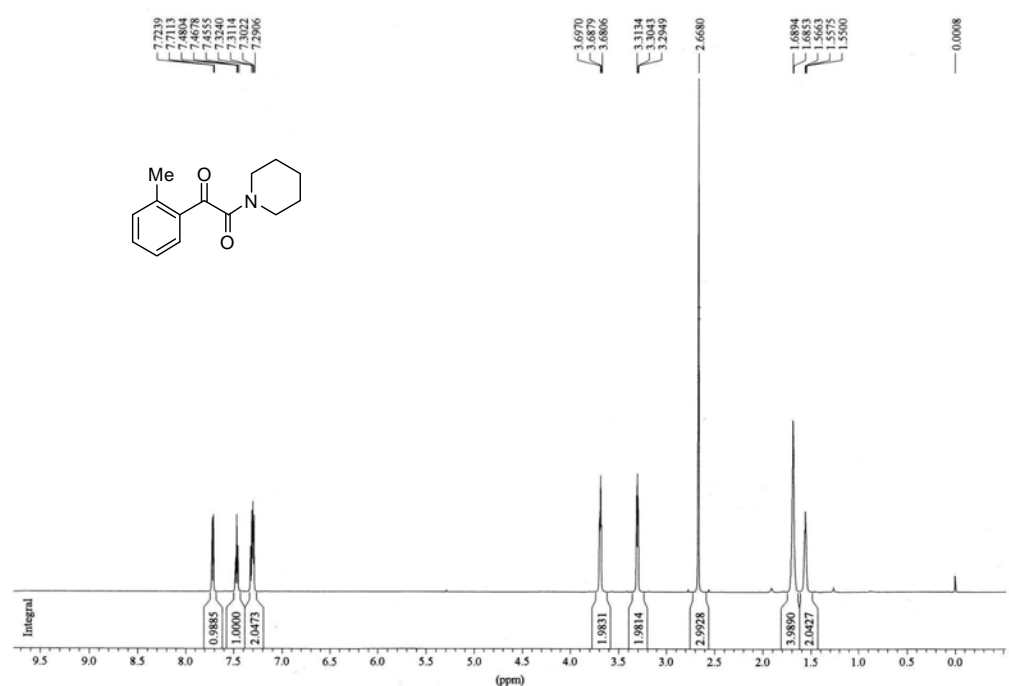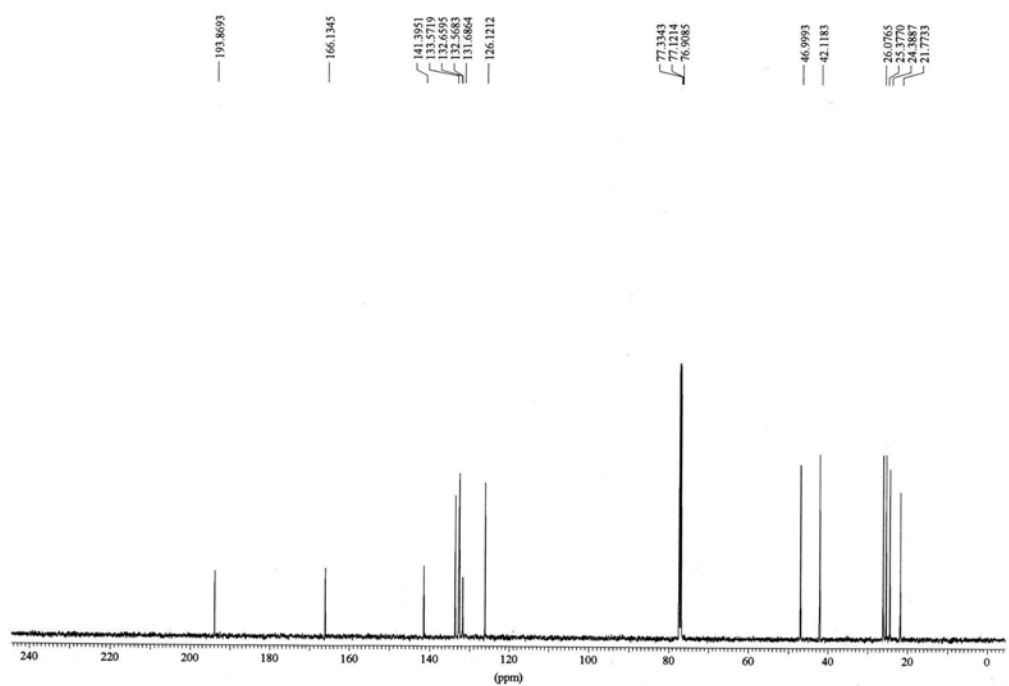

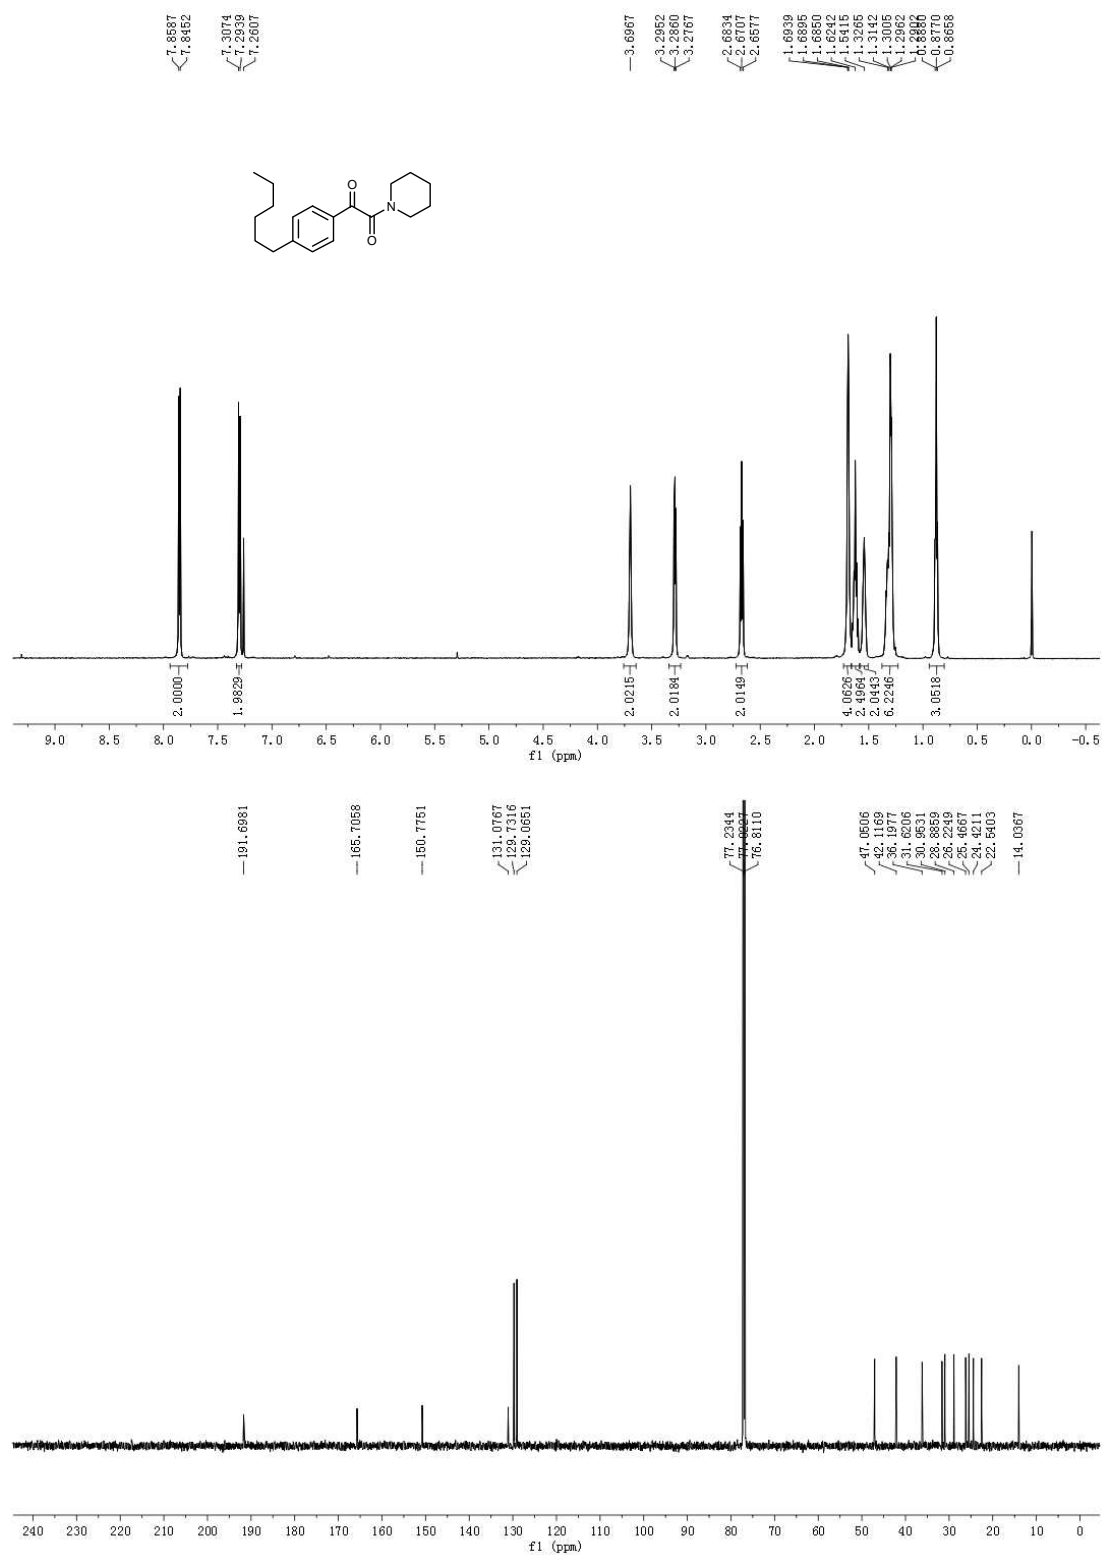

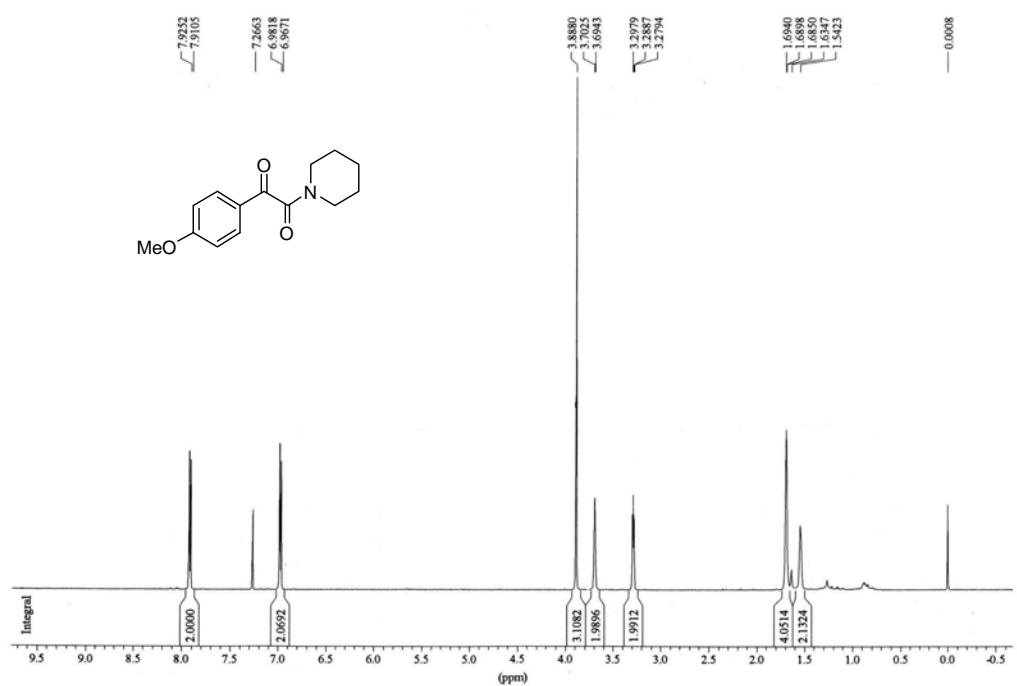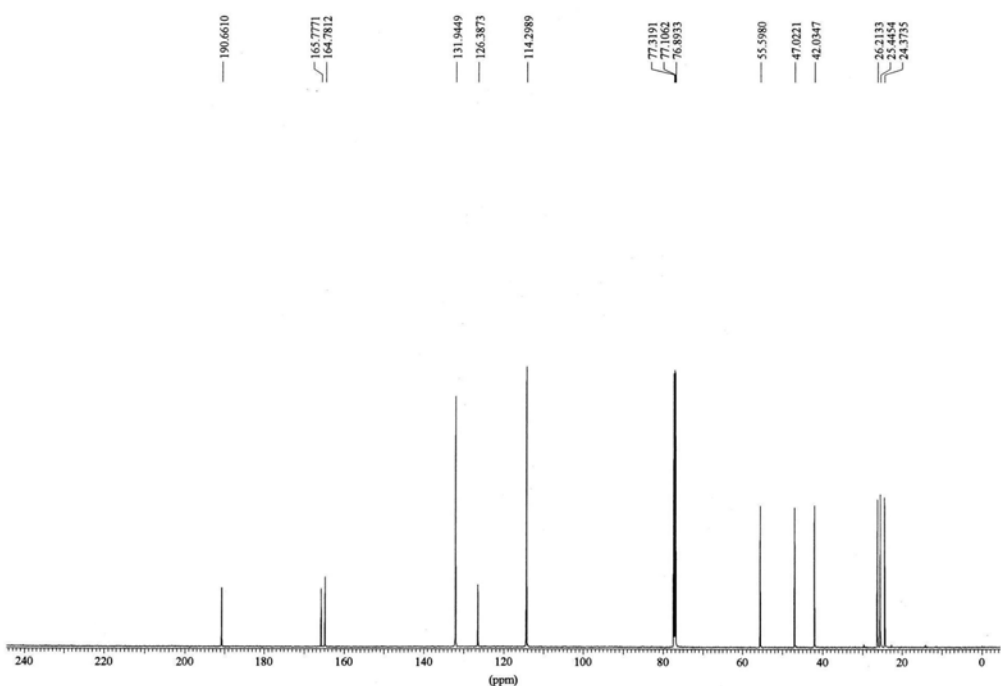

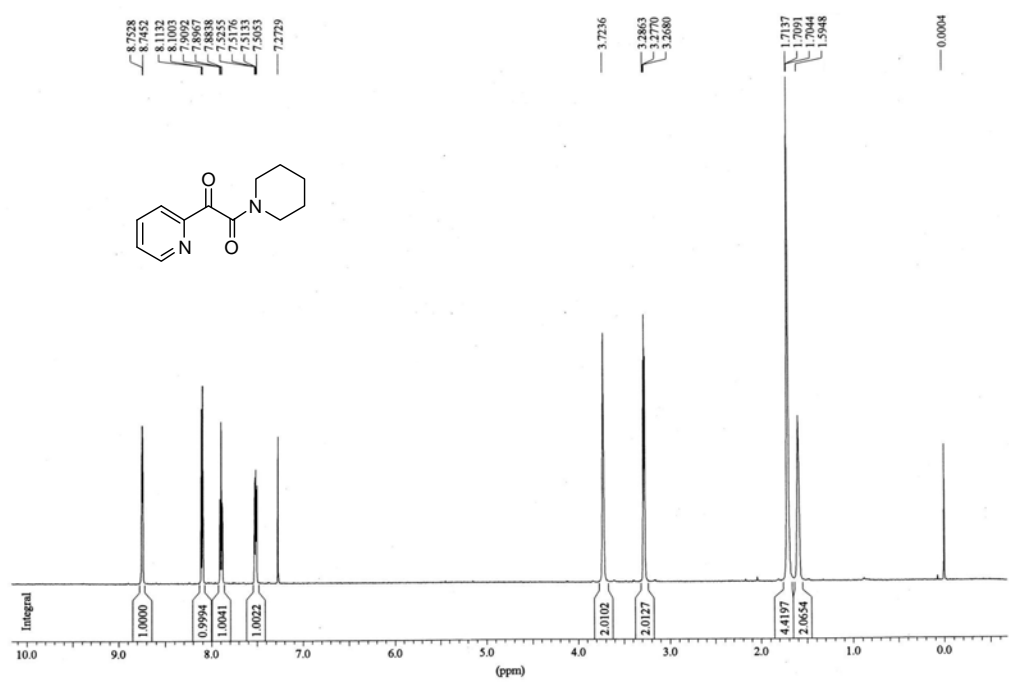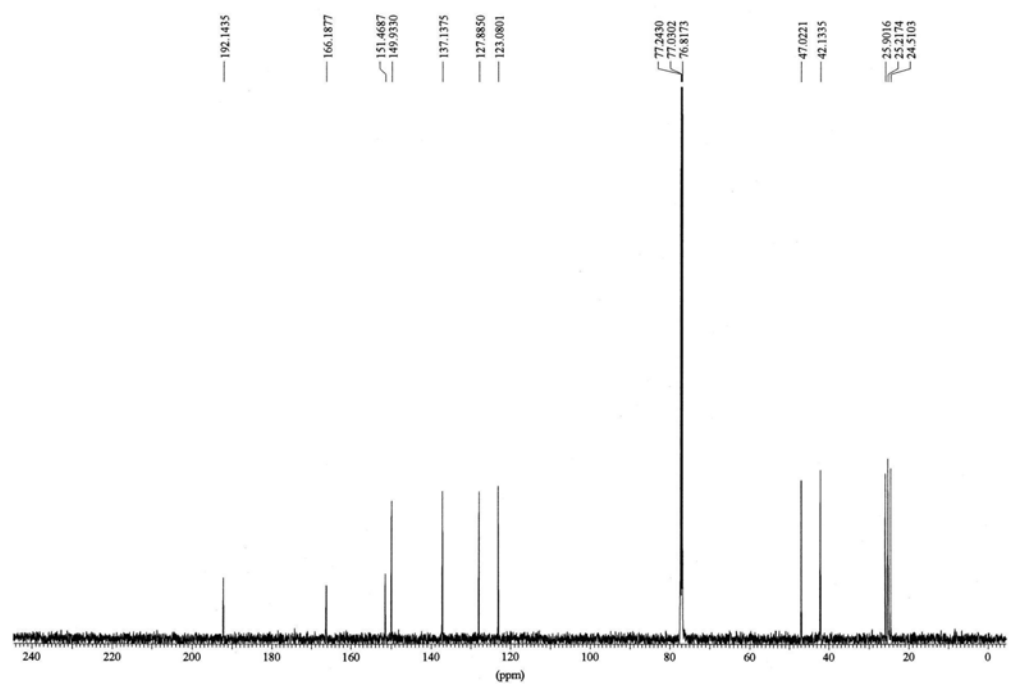

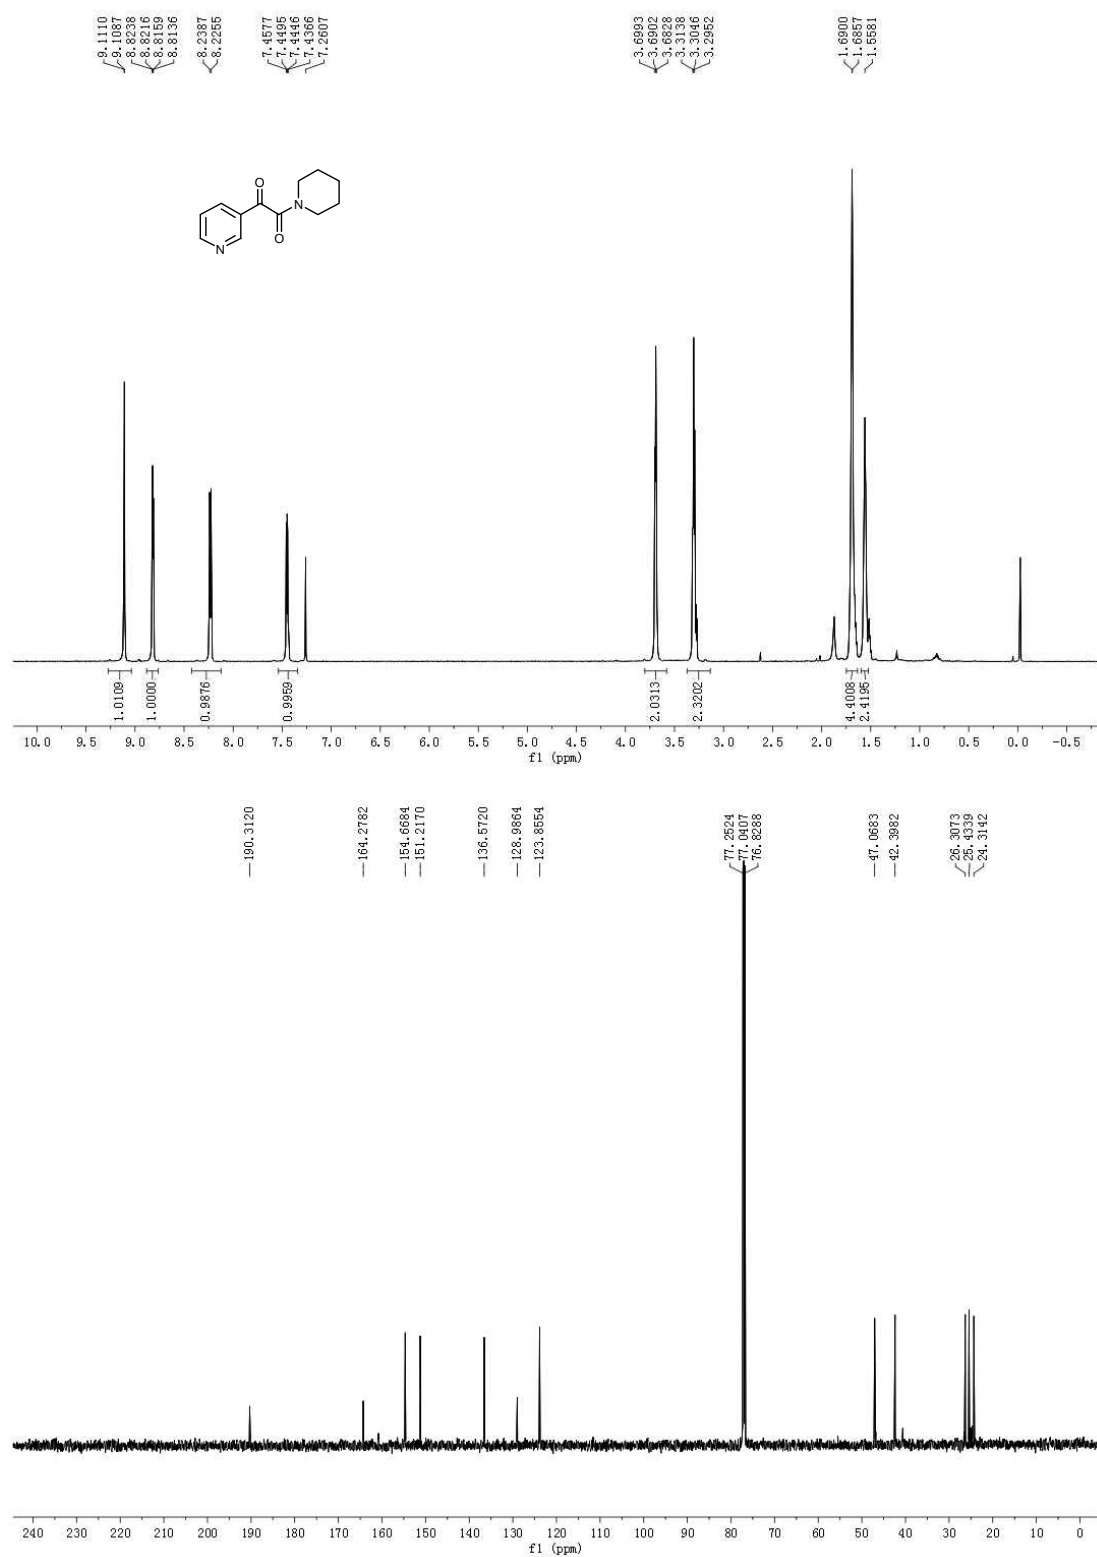

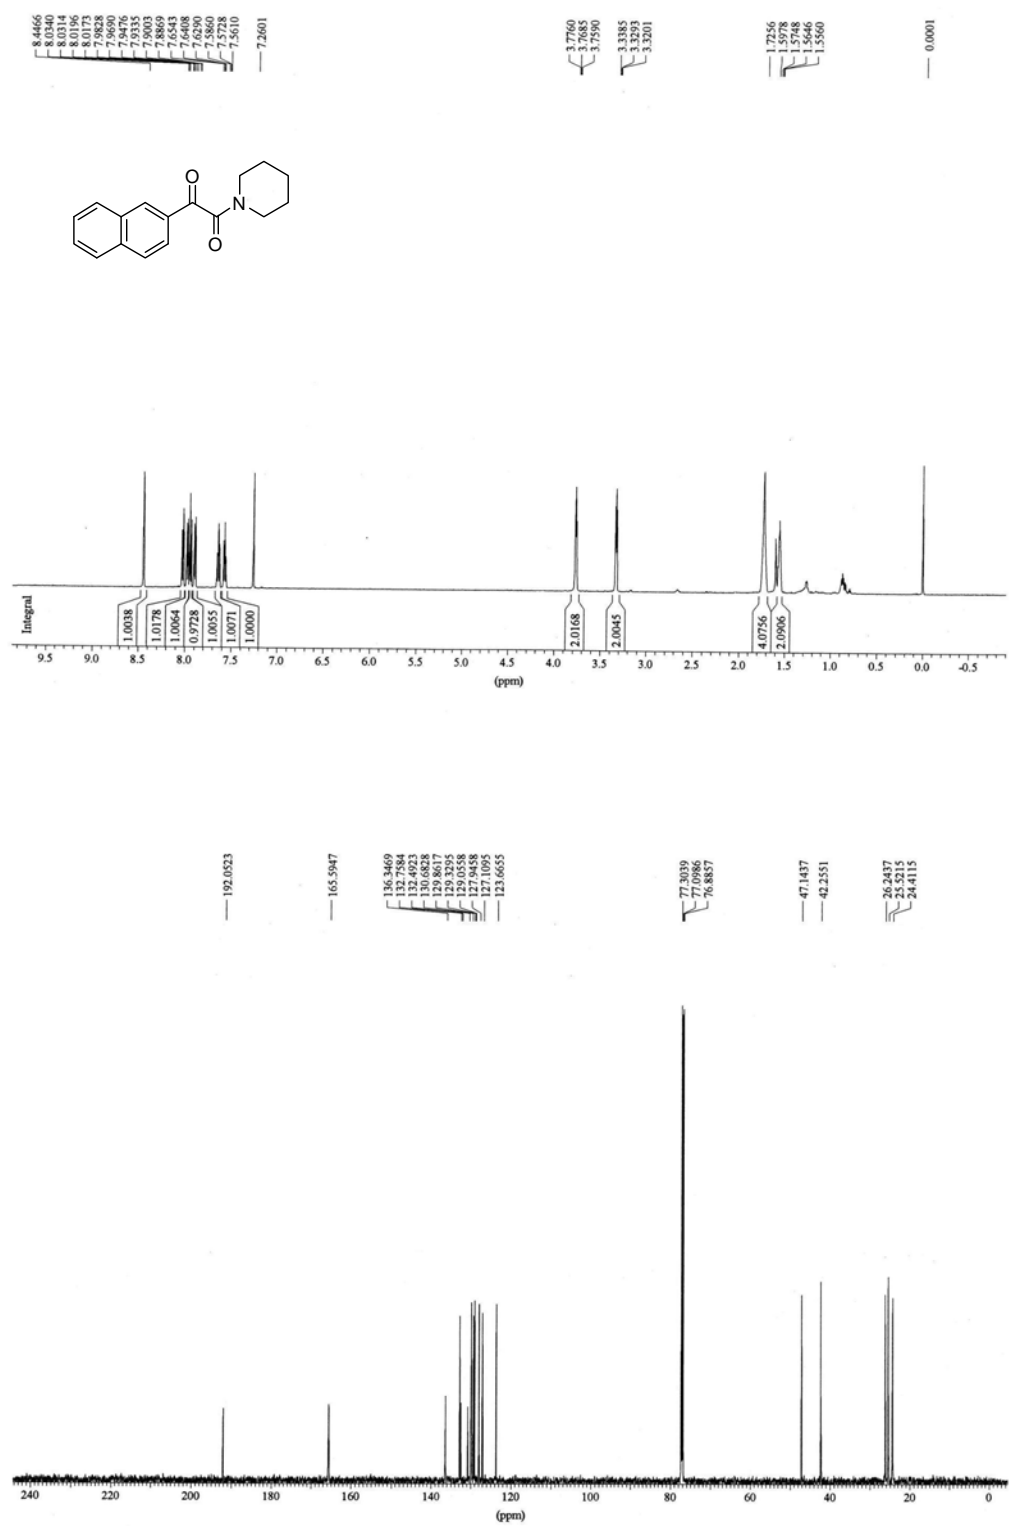

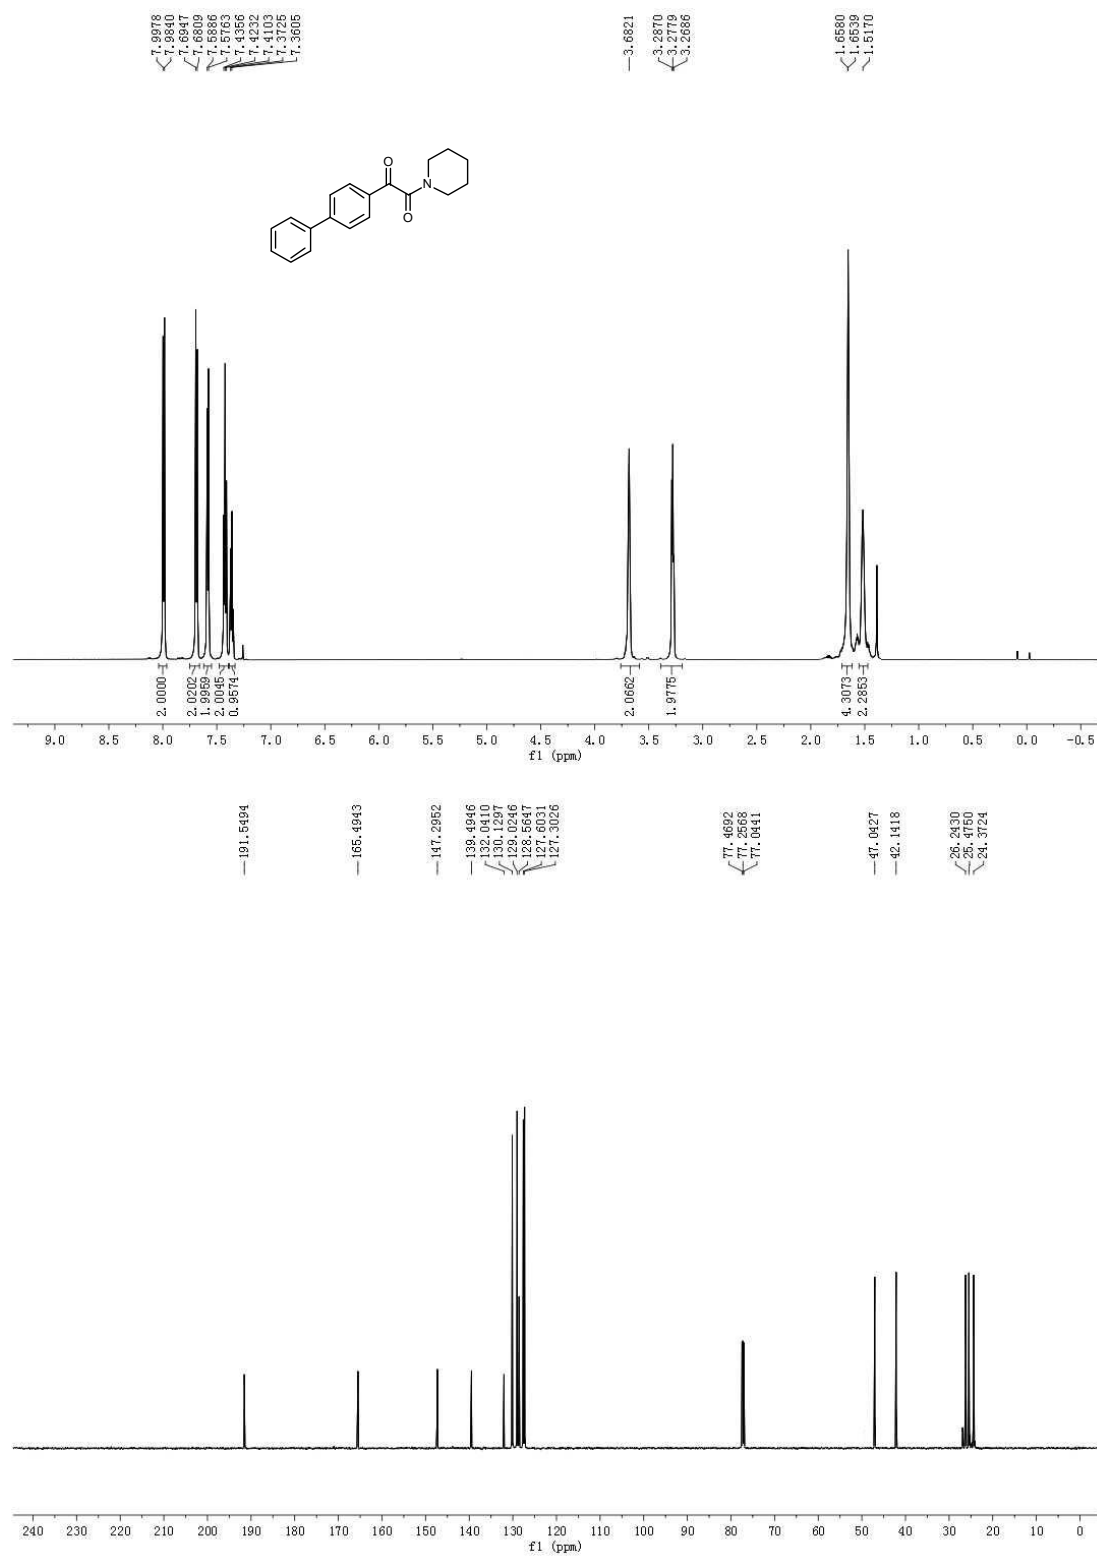



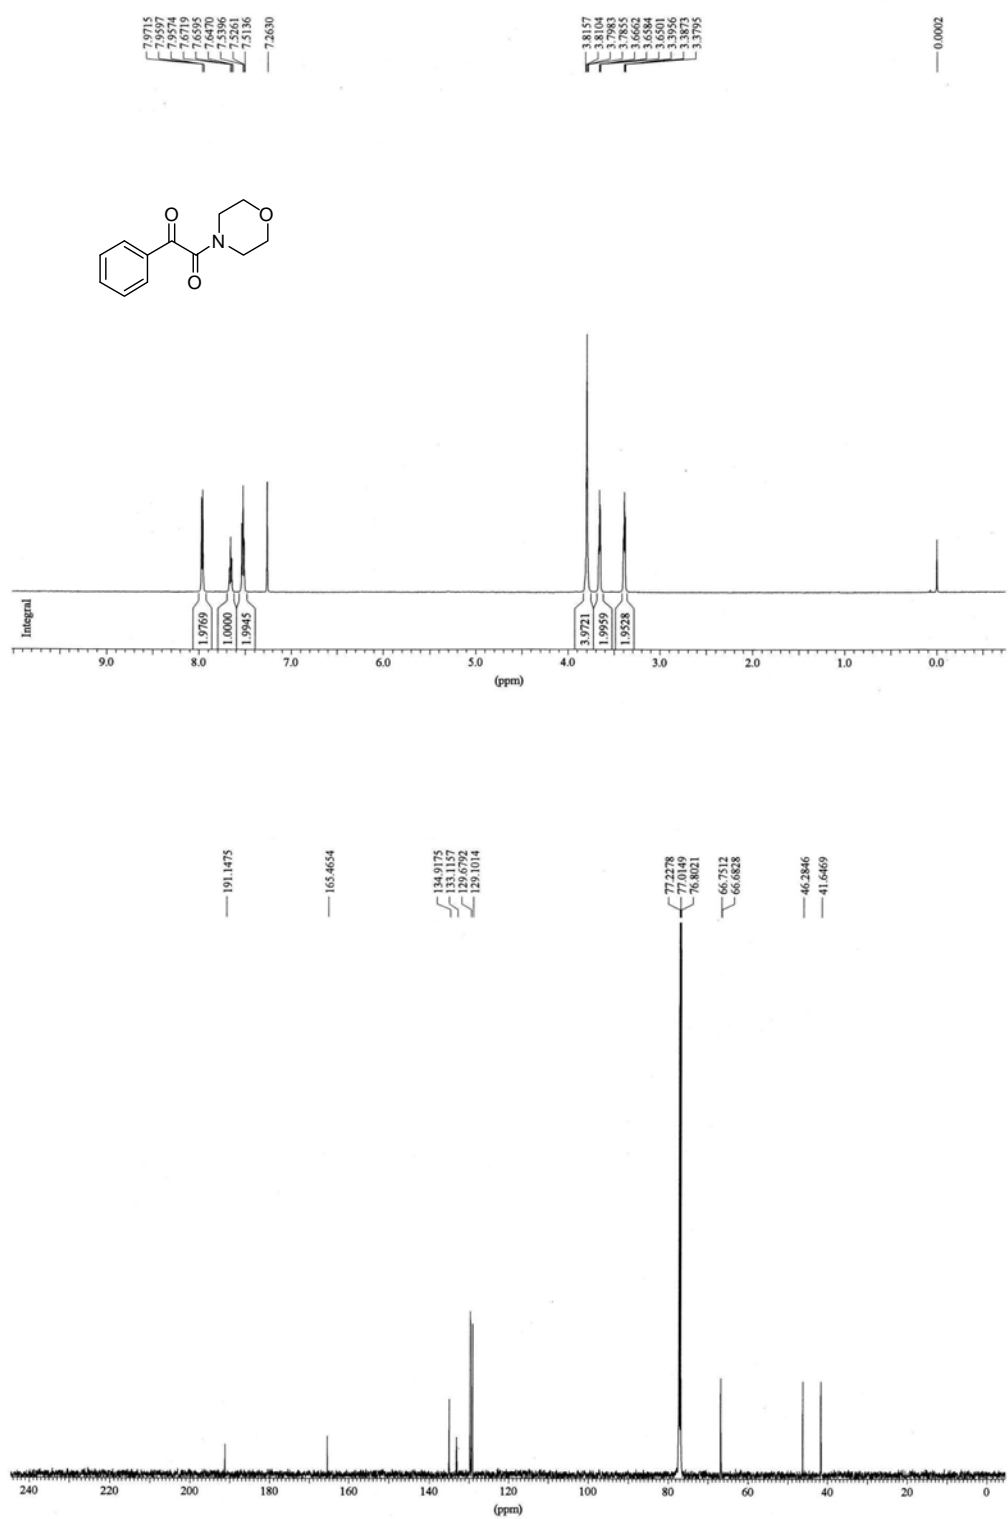

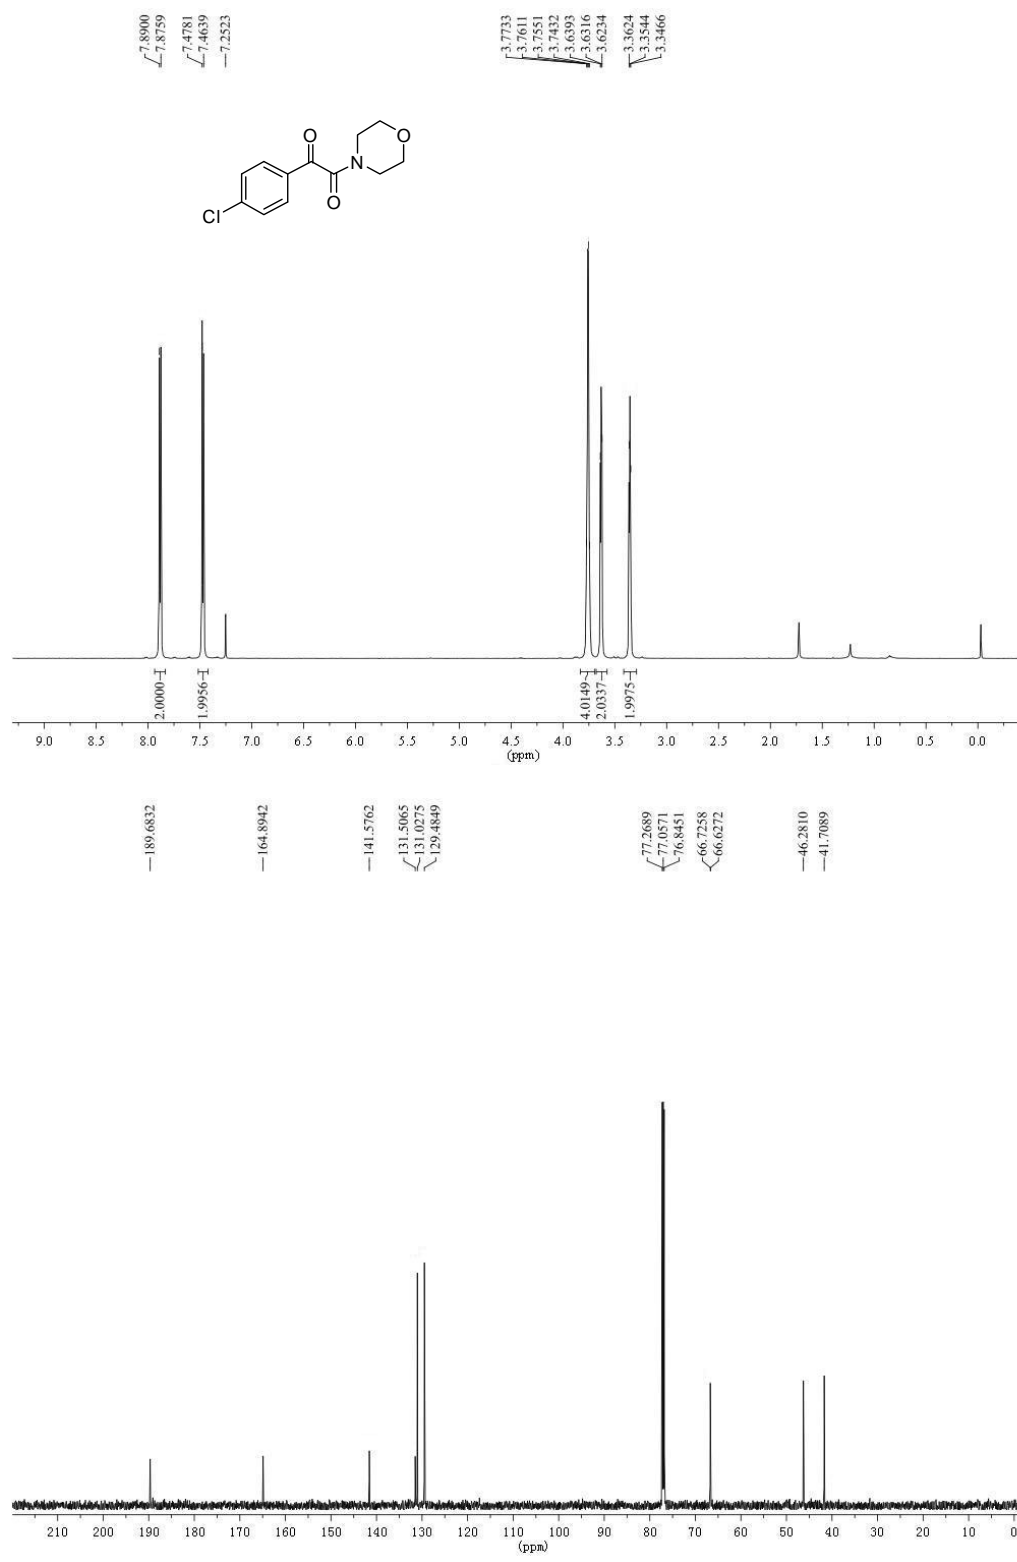

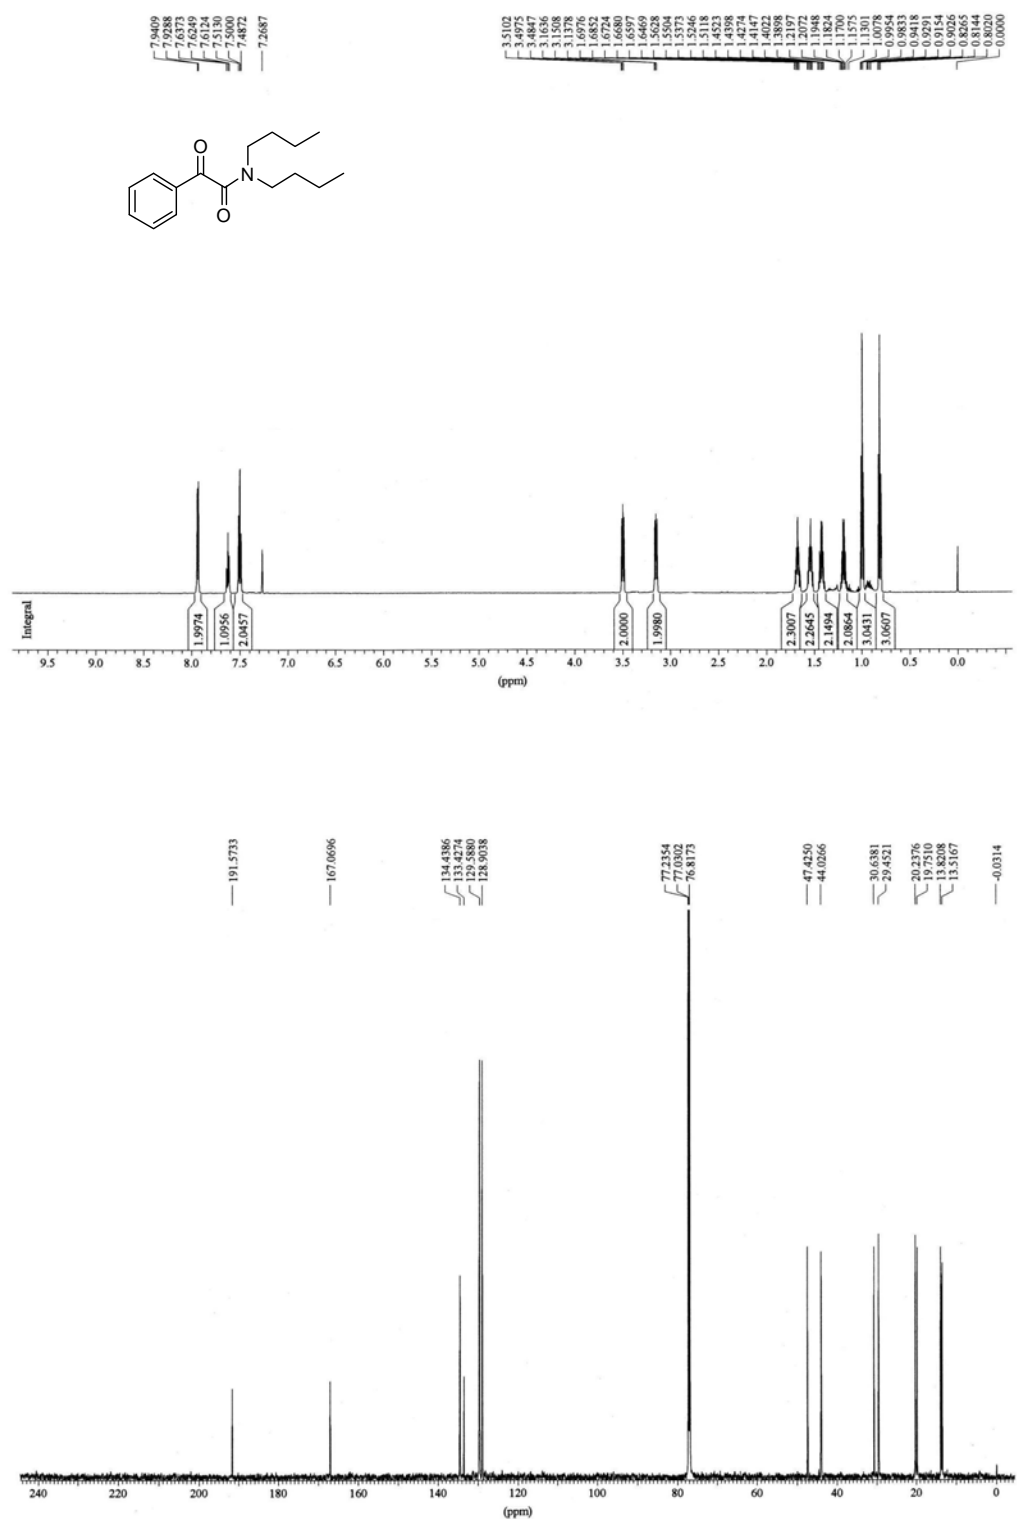

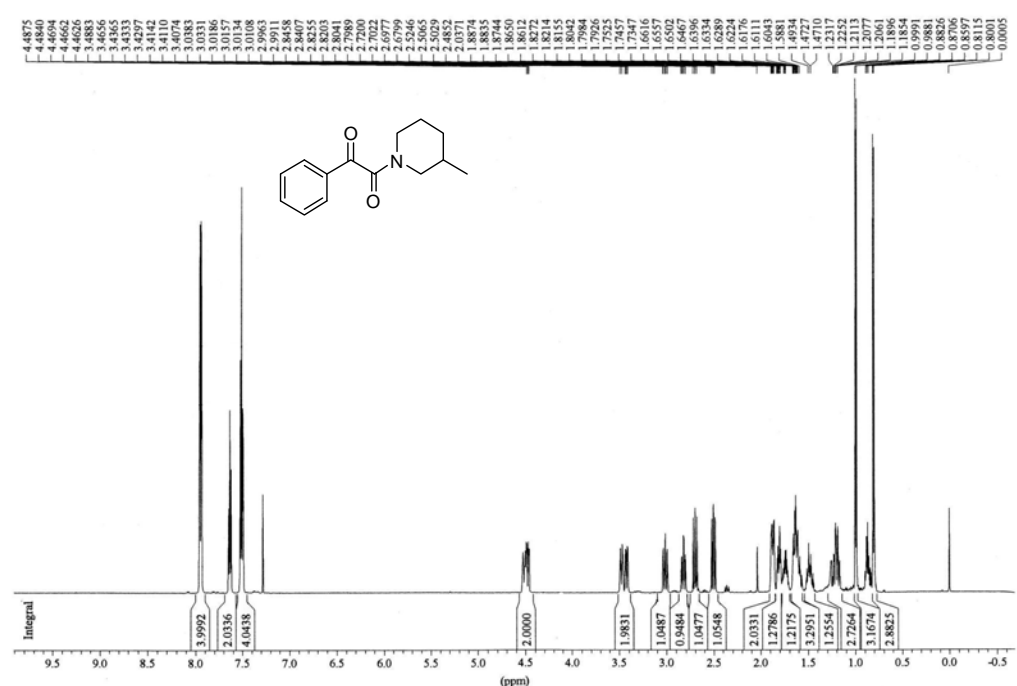

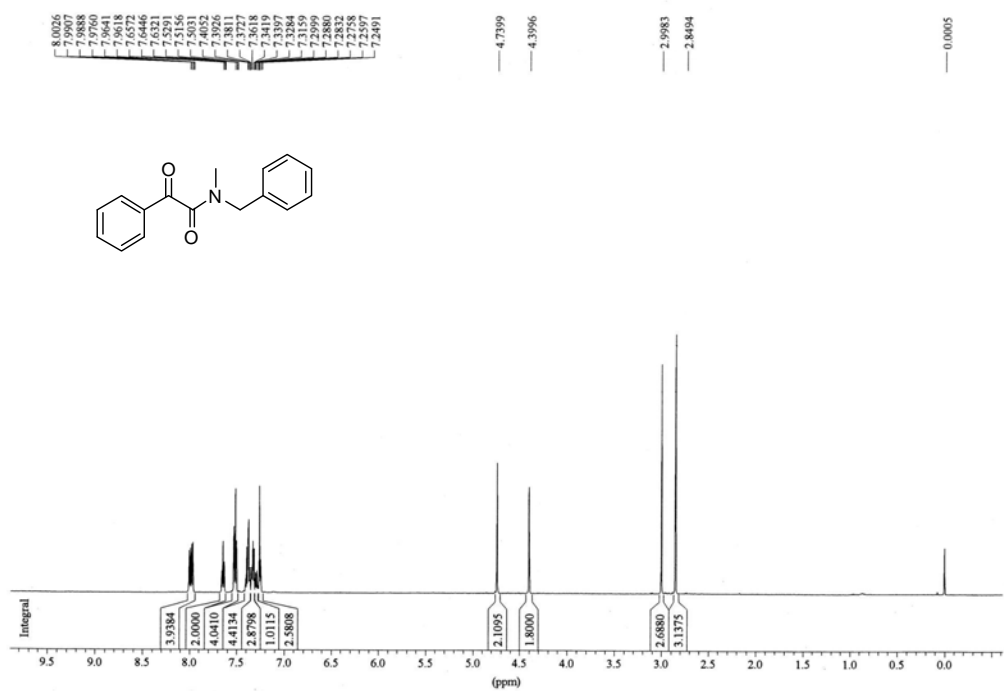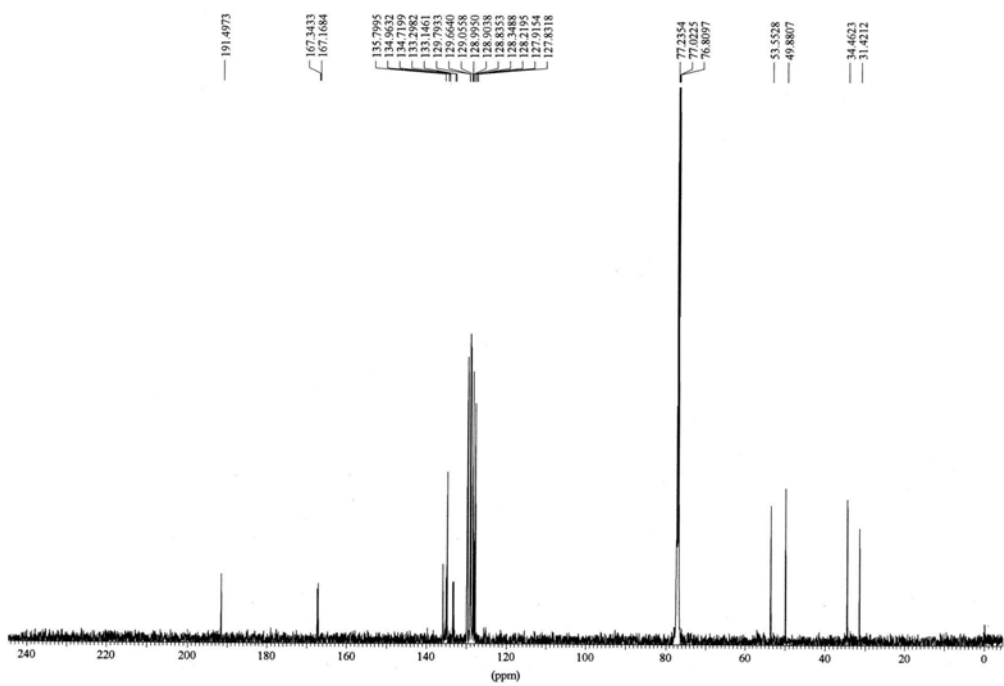

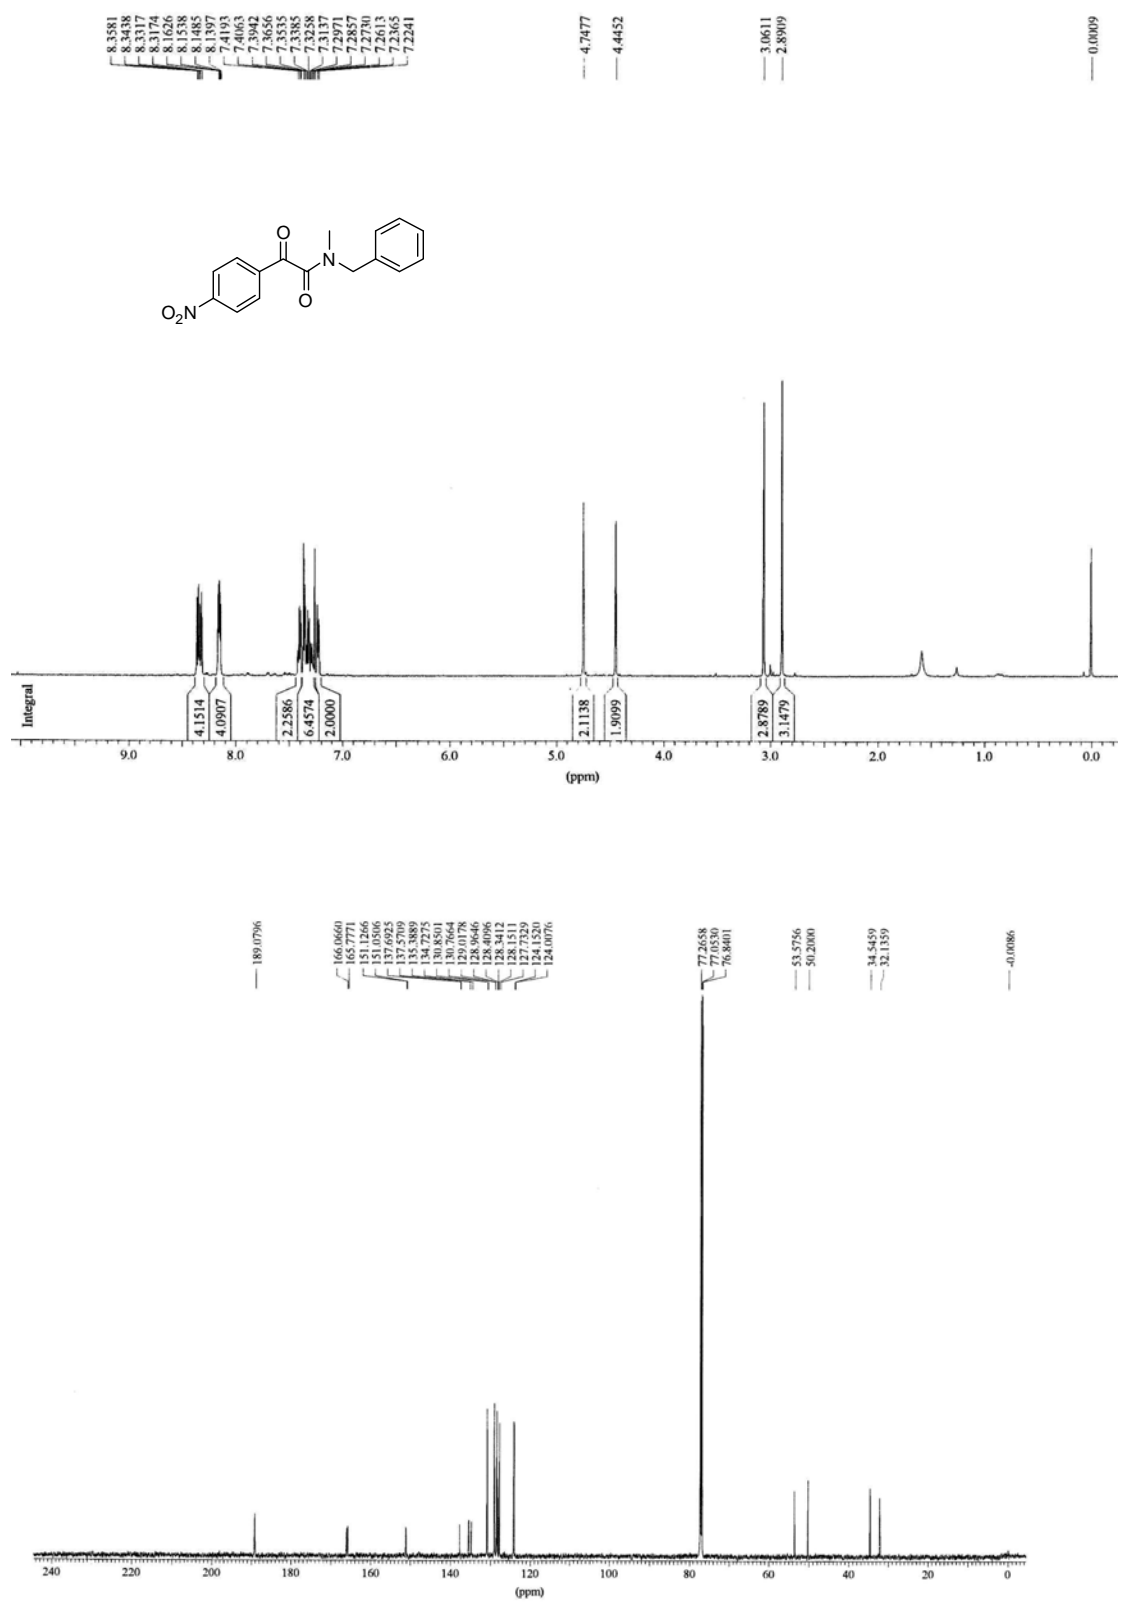

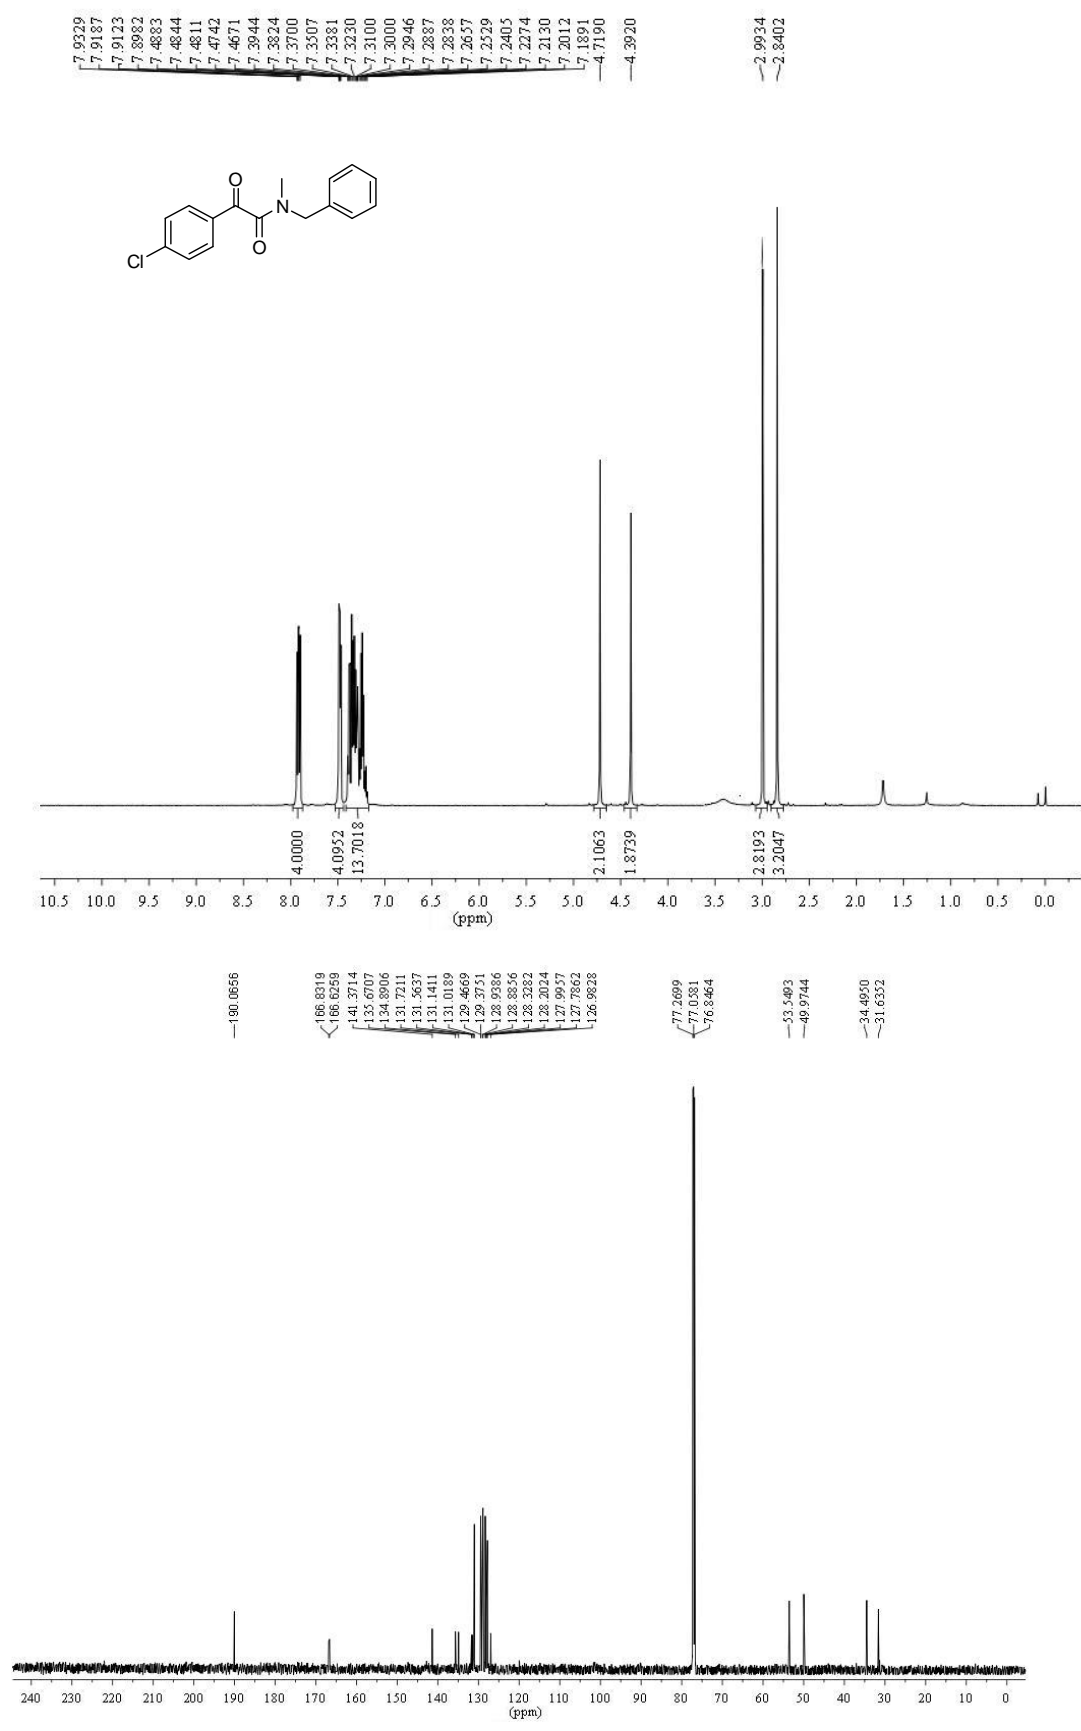

Supplement: c1sc00312g.pdf [file c1sc00312g.pdf]
